# Supplementary material
Source: publisher site journal article supplement (https://www.dovepress.com/article/566887)
Supplement: Supplementary file 1 [file 566887%20Revised%20Supplementary%20Table.pdf]

## **Supplementary Materials:**

**Supplementary Table S1.** mRNA Primers Used for RT-qPCR. Comprehensive list of mRNA-specific primer pairs employed in RT-qPCR experiments.

**Supplementary Table S2.** Demographic Characteristics of Patients with NSV, SV and Healthy Controls for CXCL10 test. Structured compilation of demographic data and clinical characteristics of non-segmental vitiligo, segmental vitiligo, and healthy donor cohorts enrolled for serum CXCL10 quantification.

**Supplementary Table S3.** Analysis data of differential miRNAs in patients with vitiligo and healthy CTRLs. Integrated dataset of microarray screening results for miRNA expression signatures in vitiligo patients and healthy controls, including fold-change values, statistical significance (p-values).

**Supplementary Table S1. mRNA Primers Used for RT-qPCR**

| <b>mRNA Primer Name</b> | <b>Primer Sequences</b> |
|-------------------------|-------------------------|
| LC3 F                   | AAGGCGCTTACAGCTCAATG    |
| LC3 R                   | CTGGGAGGCATAGACCATGT    |
| ATG5 F                  | AGAAGCTGTTTCGTCCTGTGG   |
| ATG5 R                  | AGGTGTTTCCAACATTGGCTC   |
| ATG7 F                  | CAGTTTGCCCCTTTTAGTAGTGC |
| ATG R                   | CCAGCCGATACTCGTTCAGC    |
| CXCL10 F                | ACTGTACGCTGTACCTGCATC   |
| CXCL10 R                | GGACAAAATTGGCTTGCAGGA   |
| CXCL9 F                 | AGAAAGGGTCGCTGTTCCCTG   |
| CXCL9 R                 | TTTCTCGCAGGAAGGGCTTG    |
| CCL8 F                  | TGGAGAGCTACACAAGAATCACC |
| CCL8 R                  | TGGTCCAGATGCTTCATGGAA   |
| CCL2 F                  | GAATCACCAGCAGCAAGTGTC   |
| CCL2 R                  | CGGAGTTTGGGTTTGCTTGTC   |

**Supplementary Table S2. Demographic Characteristics of Patients with NSV, SV and Healthy Controls for CXCL10 test**

| Characteristics                           | Patients with NSV<br>(n = 12) | Patients with SV<br>(n = 8) | Healthy Controls<br>(n = 20) |
|-------------------------------------------|-------------------------------|-----------------------------|------------------------------|
| Average age, y, mean age $\pm$ SD         | 31.0 $\pm$ 12.8               | 23.6 $\pm$ 12.2             | 31.9 $\pm$ 8.1               |
| Sex, n (%)                                |                               |                             |                              |
| Male                                      | 5(41.7)                       | 3(37.5)                     | 8(40.0)                      |
| Female                                    | 7(58.3)                       | 5(62.5)                     | 12(60.0)                     |
| Duration of disease, month, mean $\pm$ SD | 126.3 $\pm$ 77.1              | 61.5 $\pm$ 122.4            | NA                           |
| Score of VIDA, mean $\pm$ SD              | 3.7 $\pm$ 0.7                 | 3.0 $\pm$ 0.9               | NA                           |
| Score of VASI, mean $\pm$ SD              | 15.3 $\pm$ 22.5               | 0.9 $\pm$ 0.9               | NA                           |

*NSV: non-segmental vitiligo; SV: segmental vitiligo; VASI: Vitiligo Area Scoring Index; VIDA: Vitiligo Disease Activity Score; SD: standard deviation*

**Supplementary Table S3. Analysis data of differential miRNAs in patients with vitiligo and healthy CTRLs**

| miRNA_ID        | TJ010-<br>XYY | TJ019-<br>ZYH | XWH-<br>N008-1 | TJ017-<br>LYY | LQ-<br>N007-1 | TJ011-<br>WTT | TJ013-<br>WXY | N027-<br>LCY | TJ016-<br>WYF | WX-<br>N004-1 | YH-<br>201805<br>1401-1 | 201807<br>1201-<br>ZH | 201807<br>1203-<br>XXT | GTY-<br>201804<br>1603-1 | CT-<br>201804<br>1103-1 | 201807<br>1505-<br>XSH | 201807<br>1602-<br>YHJ | YZY-<br>201807<br>2801 | 201807<br>2301-<br>ASX | ZT-<br>201810<br>2501 | C      | T1_T3  | log2(fo<br>ldchan<br>ge) | P-value  |        |
|-----------------|---------------|---------------|----------------|---------------|---------------|---------------|---------------|--------------|---------------|---------------|-------------------------|-----------------------|------------------------|--------------------------|-------------------------|------------------------|------------------------|------------------------|------------------------|-----------------------|--------|--------|--------------------------|----------|--------|
| hsa-miR-1-3p    | 111.63        | 38.1          | 2.38           | 128.28        | 31.56         | 62.6          | 14.77         | 13.99        | 13.66         | 11.8          | 110.76                  | 23.34                 | 13.74                  | 6616.3                   | 6818.6                  | 18.82                  | 223.85                 | 97.03                  | 46.26                  | 55.7                  | 42.877 | 1402.4 | 5.0316                   | 7.45E-06 |        |
| hsa-miR-411-3p  | 0.38          | 1.04          | 0              | 0             | 0             | 0             | 0.57          | 0            | 0             | 0             | 0                       | 0                     | 1.19                   | 0.62                     | 3.93                    | 0.94                   | 1.33                   | 3.44                   | 2.51                   | 3.28                  | 0.199  | 1.724  | 3.1149                   | 0.0015   |        |
| hsa-miR-493-3p  | 37.46         | 50.9          | 34.16          | 16.93         | 57.4          | 25.43         | 42.88         | 15.59        | 70.78         | 36.37         | 1428.1                  | 53.03                 | 61.53                  | 63.98                    | 93.31                   | 29.65                  | 33.18                  | 75.8                   | 53.08                  | 230.23                | 38.79  | 212.19 | 2.4516                   | 0.0022   |        |
| hsa-miR-449c-5p | 0.38          | 0             | 0              | 0             | 0             | 0             | 0.57          | 0            | 0             | 0             | 0                       | 0.53                  | 2.99                   | 0                        | 7.86                    | 0.47                   | 0.44                   | 1.5                    | 0                      | 0                     | 0.095  | 1.379  | 3.8596                   | 0.0064   |        |
| hsa-miR-411-5p  | 5.35          | 7.27          | 0.89           | 2.01          | 0             | 0.98          | 2.56          | 0            | 2.48          | 0.98          | 3.96                    | 2.12                  | 2.39                   | 8.08                     | 42.24                   | 1.65                   | 4.87                   | 19.74                  | 4.66                   | 10.13                 | 2.252  | 9.984  | 2.1484                   | 0.0069   |        |
| hsa-miR-3677-3p | 0             | 0.69          | 2.97           | 0.86          | 0             | 0.49          | 0.28          | 2.8          | 0.62          | 0.49          | 0                       | 0.53                  | 0                      | 0                        | 0                       | 0.71                   | 0                      | 0                      | 0                      | 0                     | 0.92   | 0.124  | -2.891                   | 0.0073   |        |
| hsa-miR-1469    | 0.38          | 0             | 0              | 0             | 0             | 0             | 0             | 1.6          | 0             | 0             | 0                       | 0                     | 0.6                    | 0.62                     | 0                       | 0                      | 0                      | 34.99                  | 0                      | 1.19                  | 0.198  | 3.74   | 4.2395                   | 0.0082   |        |
| hsa-miR-4497    | 1.91          | 1.04          | 8.02           | 1.43          | 10.04         | 1.47          | 1.42          | 4.8          | 1.86          | 0.98          | 17.8                    | 3.18                  | 2.99                   | 7.45                     | 3.93                    | 2.59                   | 0.44                   | 11.96                  | 4.66                   | 69.99                 | 3.297  | 12.499 | 1.9226                   | 0.0104   |        |
| hsa-miR-6736-5p | 0             | 0             | 0              | 0             | 0             | 0             | 0.85          | 0            | 0             | 1.47          | 0                       | 1.06                  | 1.19                   | 8.7                      | 3.93                    | 0.24                   | 0                      | 1.35                   | 0                      | 2.98                  | 0.232  | 1.945  | 3.0676                   | 0.0175   |        |
| hsa-miR-526b-5p | 0.76          | 0             | 1.49           | 3.44          | 0             | 0             | 0.28          | 0            | 0             | 0             | 0                       | 0                     | 0                      | 0                        | 0                       | 0.24                   | 0                      | 0                      | 0                      | 0                     | 0.3    | 0.597  | 0.054                    | -3.467   | 0.0194 |
| hsa-miR-34c-5p  | 0.38          | 0.69          | 0              | 1.15          | 0             | 1.47          | 0.57          | 0            | 0             | 0             | 7.91                    | 2.12                  | 1.19                   | 0                        | 4.91                    | 0.71                   | 1.77                   | 2.84                   | 0                      | 2.38                  | 0.426  | 2.383  | 2.4839                   | 0.0256   |        |
| hsa-miR-548aa   | 0.76          | 2.43          | 0              | 0.57          | 2.86          | 2.94          | 1.14          | 0            | 2.48          | 0             | 0                       | 0                     | 0                      | 0                        | 0                       | 0.24                   | 1.32                   | 1.5                    | 0                      | 0                     | 1.318  | 0.306  | -2.107                   | 0.0283   |        |
| hsa-miR-548t-3p | 0.76          | 2.43          | 0              | 0.57          | 2.86          | 2.94          | 1.14          | 0            | 2.48          | 0             | 0                       | 0                     | 0                      | 0                        | 0                       | 0.24                   | 1.32                   | 1.5                    | 0                      | 0                     | 1.318  | 0.306  | -2.107                   | 0.0283   |        |
| hsa-miR-379-5p  | 31.35         | 16.62         | 0.59           | 4.59          | 1.43          | 9.29          | 15.9          | 0            | 11.8          | 10.32         | 61.32                   | 11.67                 | 7.17                   | 8.7                      | 56.97                   | 10.59                  | 18.14                  | 57.56                  | 35.51                  | 58.08                 | 10.189 | 32.571 | 1.6766                   | 0.0301   |        |
| hsa-miR-4437    | 2.29          | 0.69          | 0              | 0.57          | 4.3           | 1.96          | 0             | 0            | 0.62          | 0.98          | 0                       | 0                     | 0                      | 0                        | 0                       | 0                      | 0                      | 0                      | 1.08                   | 0                     | 1.141  | 0.108  | -3.401                   | 0.0302   |        |
| hsa-miR-1273d   | 1.91          | 2.42          | 2.67           | 0.57          | 8.61          | 1.47          | 1.7           | 3.2          | 1.24          | 2.46          | 39.56                   | 2.12                  | 2.99                   | 9.94                     | 6.88                    | 0.71                   | 2.21                   | 4.19                   | 0.72                   | 18.17                 | 2.625  | 8.749  | 1.7368                   | 0.0302   |        |
| hsa-miR-1323    | 4.97          | 1.73          | 0.3            | 6.89          | 4.3           | 1.47          | 0.85          | 0            | 0.62          | 1.47          | 0                       | 1.06                  | 0.6                    | 0                        | 0                       | 0.71                   | 3.98                   | 0.6                    | 0                      | 0                     | 2.26   | 0.695  | -1.701                   | 0.0328   |        |
| hsa-miR-370-3p  | 222.86        | 131.59        | 2123.5         | 44.48         | 552.47        | 136.46        | 155.89        | 338.16       | 281.89        | 374.48        | 8491.4                  | 323.47                | 612.35                 | 2607.1                   | 1942.8                  | 184.97                 | 160.59                 | 506.55                 | 206.59                 | 2028                  | 436.17 | 1706.4 | 1.968                    | 0.0329   |        |

|                 |        |        |        |        |        |        |        |        |        |        |        |        |        |        |        |        |        |        |        |        |        |        |        |        |
|-----------------|--------|--------|--------|--------|--------|--------|--------|--------|--------|--------|--------|--------|--------|--------|--------|--------|--------|--------|--------|--------|--------|--------|--------|--------|
| hsa-miR-4638-5p | 0.38   | 1.04   | 0.3    | 0      | 1.43   | 0      | 1.7    | 0.8    | 0      | 0.49   | 0      | 0.53   | 0      | 8.08   | 4.91   | 0.47   | 1.33   | 0.9    | 0.72   | 5.06   | 0.614  | 2.2    | 1.8412 | 0.0347 |
| hsa-miR-522-3p  | 0.38   | 0      | 0      | 4.3    | 0      | 0      | 0.28   | 0.4    | 0      | 0      | 0      | 0      | 0      | 0      | 0      | 0.24   | 0      | 0      | 0      | 0      | 0.536  | 0.024  | -4.481 | 0.036  |
| hsa-miR-6808-3p | 3.06   | 1.04   | 2.08   | 1.15   | 4.3    | 4.4    | 0.85   | 0      | 0      | 0.98   | 1.98   | 0      | 0      | 0      | 0      | 0.94   | 0.44   | 1.35   | 0.72   | 1.49   | 1.786  | 0.692  | -1.368 | 0.0372 |
| hsa-miR-485-3p  | 0      | 0.69   | 0      | 0.29   | 1.43   | 4.89   | 0.85   | 0      | 0.62   | 4.42   | 11.87  | 3.71   | 0      | 0.62   | 1.96   | 0.94   | 2.21   | 5.98   | 15.78  | 5.66   | 1.319  | 4.873  | 1.8854 | 0.0383 |
| hsa-miR-127-3p  | 256.12 | 188.72 | 349.65 | 121.11 | 572.56 | 199.55 | 259.82 | 298.99 | 683.62 | 866.41 | 4389.1 | 454.45 | 553.21 | 1054.8 | 1442.9 | 228.04 | 157.05 | 517.46 | 415.69 | 1842.5 | 379.66 | 1105.5 | 1.542  | 0.0394 |
| hsa-miR-8072    | 0.38   | 0.35   | 0      | 0      | 1.43   | 0      | 0.28   | 0      | 0      | 0      | 1.98   | 0      | 0      | 4.35   | 4.91   | 0      | 0      | 0      | 0      | 3.28   | 0.244  | 1.452  | 2.5731 | 0.0398 |
| hsa-miR-4488    | 4.2    | 0.69   | 6.83   | 2.01   | 8.61   | 1.96   | 2.84   | 23.18  | 1.86   | 3.93   | 21.76  | 5.83   | 5.97   | 26.09  | 1.96   | 2.35   | 0.44   | 11.51  | 3.59   | 103.05 | 5.611  | 18.255 | 1.702  | 0.0406 |
| hsa-miR-548w    | 0.38   | 0.35   | 0      | 0      | 0      | 0      | 0      | 0      | 0      | 0      | 0      | 2.65   | 1.79   | 0      | 0      | 0.24   | 0      | 0.75   | 1.08   | 0      | 0.073  | 0.651  | 3.1567 | 0.0412 |
| hsa-miR-518b    | 1.53   | 1.04   | 0      | 2.87   | 0      | 0      | 0      | 0      | 0      | 0      | 0      | 0      | 0      | 0      | 0      | 0      | 0      | 0.45   | 0      | 0      | 0.544  | 0.045  | -3.596 | 0.0423 |
| hsa-miR-512-3p  | 0.38   | 0      | 2.38   | 10.91  | 0      | 1.47   | 0      | 0      | 0.62   | 0      | 0      | 0.53   | 1.19   | 0      | 0      | 0.71   | 0      | 0      | 0.72   | 0      | 1.576  | 0.315  | -2.323 | 0.0437 |
| hsa-miR-202-5p  | 0.38   | 0      | 0      | 0      | 0      | 0.49   | 0      | 0      | 0      | 0      | 0      | 0      | 0      | 0      | 0      | 0.71   | 0.44   | 2.39   | 1.79   | 0.3    | 0.087  | 0.563  | 2.694  | 0.0448 |
| hsa-miR-1261    | 0      | 0      | 0      | 0.29   | 0      | 0      | 0.28   | 0      | 0.62   | 0.49   | 7.91   | 0.53   | 0.6    | 1.24   | 0      | 0.94   | 0      | 0.9    | 0      | 1.79   | 0.168  | 1.391  | 3.0496 | 0.0513 |
| hsa-miR-548ap-2 | 0.76   | 2.78   | 0      | 0.57   | 0      | 2.94   | 1.71   | 0      | 2.48   | 0      | 0      | 0      | 0      | 0      | 0      | 0.24   | 1.32   | 1.5    | 0      | 0      | 1.124  | 0.306  | -1.877 | 0.0514 |
| hsa-miR-1273a   | 1.91   | 0.69   | 1.49   | 1.43   | 2.87   | 0.98   | 0.57   | 1.6    | 0      | 0.98   | 5.93   | 3.71   | 2.39   | 1.86   | 4.91   | 1.65   | 0.44   | 3.59   | 1.43   | 4.17   | 1.252  | 3.008  | 1.2646 | 0.0528 |
| hsa-miR-548ag   | 0.38   | 0.35   | 0      | 0      | 0      | 0      | 0      | 0      | 0      | 0      | 0      | 1.59   | 0      | 0      | 0      | 0.24   | 1.77   | 0.9    | 1.08   | 0      | 0.073  | 0.558  | 2.9343 | 0.0533 |
| hsa-miR-4466    | 0      | 0.35   | 3.27   | 2.01   | 0      | 0.49   | 1.14   | 9.19   | 1.86   | 1.97   | 31.65  | 3.18   | 0.6    | 10.56  | 9.82   | 1.41   | 0.44   | 3.29   | 1.43   | 18.17  | 2.028  | 8.055  | 1.9898 | 0.0537 |
| hsa-miR-5094    | 0      | 0      | 0      | 0.29   | 0      | 0      | 0      | 0      | 0      | 0      | 0      | 0      | 0.6    | 3.73   | 0      | 0      | 0.44   | 1.05   | 0      | 0      | 0.029  | 0.582  | 4.3269 | 0.0538 |
| hsa-miR-1273h-5 | 22.55  | 6.93   | 16.04  | 13.49  | 45.92  | 21.52  | 13.35  | 13.19  | 19.87  | 15.73  | 189.88 | 24.39  | 14.34  | 41.62  | 71.7   | 7.77   | 21.23  | 10.02  | 21.88  | 65.53  | 18.859 | 46.836 | 1.3124 | 0.0567 |
| hsa-miR-513c-5p | 0      | 0      | 0      | 0      | 0      | 0      | 0.28   | 0      | 0      | 0      | 0      | 0      | 0      | 0      | 0      | 0.24   | 0.44   | 1.5    | 0      | 2.98   | 0.028  | 0.516  | 4.2039 | 0.0586 |
| hsa-miR-877-3p  | 1.15   | 0      | 0      | 0.29   | 0      | 0.98   | 0.28   | 0      | 0.62   | 0      | 0      | 0      | 0      | 3.11   | 0      | 0.47   | 0.44   | 1.79   | 6.81   | 0      | 0.332  | 1.262  | 1.9265 | 0.061  |

|                  |        |        |       |        |        |        |        |       |        |        |        |        |        |        |        |        |        |        |       |        |        |        |        |        |
|------------------|--------|--------|-------|--------|--------|--------|--------|-------|--------|--------|--------|--------|--------|--------|--------|--------|--------|--------|-------|--------|--------|--------|--------|--------|
| hsa-miR-7110-3p  | 0.76   | 0      | 0     | 0.29   | 0      | 0.49   | 0.28   | 0     | 0      | 0      | 0      | 0      | 0      | 0      | 0      | 0      | 0      | 0.9    | 3.23  | 6.25   | 0.182  | 1.038  | 2.5118 | 0.0626 |
| hsa-miR-1238-3p  | 0.38   | 0      | 0     | 1.15   | 0      | 0      | 0      | 0     | 0      | 0.49   | 0      | 0      | 1.79   | 0      | 0      | 0.24   | 0      | 0.3    | 9.68  | 0      | 0.202  | 1.201  | 2.5718 | 0.0665 |
| hsa-miR-3653-3p  | 0.38   | 0.35   | 0.89  | 0      | 0      | 0      | 0.57   | 1.6   | 0.62   | 0      | 3.96   | 2.12   | 0.6    | 6.21   | 0      | 0.71   | 0      | 4.34   | 0     | 0      | 0.441  | 1.794  | 2.0243 | 0.0684 |
| hsa-miR-29b-1-5p | 0.38   | 0.35   | 0     | 0      | 0      | 0      | 0      | 0     | 0      | 0      | 0      | 0.53   | 0.6    | 0      | 0      | 0.24   | 0.44   | 0.45   | 0     | 3.57   | 0.073  | 0.583  | 2.9975 | 0.07   |
| hsa-miR-150-5p   | 259.18 | 2331.5 | 23.47 | 294.45 | 143.5  | 286.12 | 181.45 | 52.76 | 148.4  | 147.92 | 75.16  | 197.26 | 38.83  | 26.09  | 70.72  | 216.27 | 214.12 | 607.02 | 97.56 | 413.11 | 386.88 | 195.61 | -0.984 | 0.071  |
| hsa-miR-1258     | 0      | 0      | 0     | 0.29   | 4.3    | 0      | 0      | 0     | 0      | 2.46   | 0      | 0      | 0      | 0      | 0      | 0      | 0      | 0.3    | 0     | 0      | 0.705  | 0.03   | -4.555 | 0.0733 |
| hsa-miR-369-5p   | 4.2    | 5.54   | 0     | 1.15   | 0      | 2.45   | 3.69   | 0.8   | 1.86   | 1.97   | 49.45  | 1.59   | 1.19   | 0      | 0      | 3.77   | 2.65   | 5.53   | 7.17  | 17.57  | 2.166  | 8.892  | 2.0375 | 0.0752 |
| hsa-miR-323a-5p  | 0.76   | 0      | 3.27  | 0.29   | 0      | 0.49   | 0.28   | 0     | 0.62   | 2.95   | 1.98   | 0.53   | 0      | 2.48   | 7.86   | 0.94   | 0      | 2.24   | 4.66  | 9.53   | 0.866  | 3.022  | 1.8031 | 0.0796 |
| hsa-miR-369-3p   | 1.15   | 2.08   | 0.3   | 1.43   | 0      | 0      | 1.7    | 0     | 0      | 0.98   | 0      | 1.06   | 0      | 6.21   | 16.7   | 0.24   | 1.77   | 0      | 2.51  | 0.89   | 0.764  | 2.938  | 1.9432 | 0.0798 |
| hsa-miR-128-1-5p | 4.2    | 0.69   | 3.27  | 3.44   | 7.17   | 0      | 0.85   | 0     | 1.86   | 1.97   | 0      | 0.53   | 1.19   | 2.48   | 0      | 0.71   | 2.21   | 1.94   | 0     | 0      | 2.345  | 0.906  | -1.372 | 0.0848 |
| hsa-miR-3130-5p  | 0      | 0.35   | 0     | 0.29   | 0      | 0.98   | 0.28   | 0     | 0      | 0      | 0      | 0      | 0      | 0      | 0      | 0      | 0      | 0.15   | 0     | 0      | 0.19   | 0.015  | -3.663 | 0.0893 |
| hsa-miR-342-3p   | 215.6  | 400.3  | 18.42 | 118.53 | 67.44  | 179.5  | 76.95  | 25.98 | 126.67 | 98.78  | 79.12  | 136.28 | 40.62  | 1.24   | 31.43  | 81.43  | 159.26 | 162.67 | 52.36 | 28.29  | 132.82 | 77.27  | -0.782 | 0.094  |
| hsa-miR-1291     | 3.82   | 1.39   | 8.32  | 1.72   | 7.17   | 2.93   | 4.26   | 3.6   | 0.62   | 1.47   | 19.78  | 1.59   | 6.57   | 3.11   | 13.75  | 2.59   | 3.54   | 7.03   | 2.15  | 20.85  | 3.53   | 8.096  | 1.1975 | 0.094  |
| hsa-miR-6726-5p  | 0      | 0.35   | 5.94  | 0      | 0      | 0      | 0      | 0     | 0.62   | 0      | 0      | 0      | 0.6    | 0      | 0      | 0      | 0      | 0      | 0     | 0      | 0.691  | 0.06   | -3.526 | 0.0977 |
| hsa-miR-6815-5p  | 6.12   | 1.39   | 4.75  | 7.46   | 2.87   | 6.85   | 4.54   | 11.59 | 6.21   | 6.39   | 1.98   | 4.24   | 3.58   | 0.62   | 0.98   | 2.59   | 3.54   | 7.92   | 1.79  | 10.42  | 5.817  | 3.766  | -0.627 | 0.0977 |
| hsa-miR-199a-5p  | 248.86 | 240.67 | 30.3  | 90.11  | 182.24 | 176.08 | 157.88 | 93.93 | 93.14  | 50.62  | 363.94 | 362.18 | 156.52 | 106.22 | 352.62 | 130.61 | 355.24 | 369.29 | 54.88 | 357.11 | 136.38 | 260.86 | 0.9356 | 0.1056 |
| hsa-miR-1538     | 3.82   | 1.04   | 2.08  | 4.02   | 1.43   | 1.96   | 1.14   | 5.6   | 1.24   | 1.47   | 0      | 4.24   | 0      | 0      | 0      | 1.65   | 0.44   | 2.99   | 1.08  | 1.79   | 2.38   | 1.219  | -0.965 | 0.1079 |
| hsa-miR-3622b-2  | 0      | 0      | 0     | 0.29   | 0      | 0      | 0      | 0     | 0      | 0      | 0      | 0      | 0      | 0      | 0      | 0.47   | 0      | 1.2    | 0     | 2.68   | 0.029  | 0.435  | 3.9069 | 0.1109 |
| hsa-miR-493-5p   | 11.85  | 12.47  | 3.27  | 3.73   | 20.09  | 7.34   | 4.26   | 0     | 4.97   | 3.93   | 118.68 | 4.77   | 0.6    | 0.62   | 20.63  | 3.53   | 12.83  | 14.8   | 22.24 | 11.02  | 7.191  | 20.972 | 1.5442 | 0.1145 |
| hsa-miR-615-5p   | 0.38   | 0      | 3.27  | 0.29   | 0      | 0.49   | 0      | 0     | 0      | 0.49   | 0      | 0      | 0      | 0      | 0      | 0.71   | 0      | 0      | 0     | 0      | 0.492  | 0.071  | -2.793 | 0.1146 |

|                  |      |       |       |       |       |      |      |       |      |      |        |       |       |        |        |      |       |       |      |       |        |        |        |        |        |
|------------------|------|-------|-------|-------|-------|------|------|-------|------|------|--------|-------|-------|--------|--------|------|-------|-------|------|-------|--------|--------|--------|--------|--------|
| hsa-miR-7977     | 1.15 | 0     | 0     | 0     | 0     | 0.49 | 0    | 0.4   | 0    | 0    | 0      | 0     | 0     | 1.86   | 0      | 0.24 | 1.33  | 3.29  | 0.72 | 0.3   | 0.204  | 0.774  | 1.9238 | 0.1172 |        |
| hsa-miR-4745-3p  | 0.38 | 0     | 0     | 0.57  | 0     | 0.49 | 0.85 | 0.4   | 0    | 0    | 0      | 0     | 0.6   | 0      | 0      | 0    | 0     | 0     | 0    | 0     | 0      | 0.269  | 0.06   | -2.165 | 0.1179 |
| hsa-miR-3136-5p  | 1.15 | 1.39  | 2.67  | 0.29  | 0     | 0    | 0    | 1.2   | 0    | 0.49 | 0      | 0     | 1.19  | 0      | 0      | 0.47 | 0.44  | 0     | 0    | 0     | 0.719  | 0.21   | -1.776 | 0.1184 |        |
| hsa-miR-4526     | 0.38 | 0     | 9.8   | 0     | 0     | 0    | 0    | 3.2   | 0.62 | 0    | 0      | 0     | 0.6   | 1.86   | 0      | 0.47 | 0     | 0.45  | 0    | 0     | 1.4    | 0.338  | -2.05  | 0.1187 |        |
| hsa-miR-1228-3p  | 0.76 | 0     | 0     | 0     | 0     | 0.98 | 0    | 0     | 0.62 | 0    | 0      | 1.59  | 0     | 0      | 2.95   | 0    | 0.88  | 0     | 4.3  | 0     | 0.236  | 0.972  | 2.0422 | 0.1202 |        |
| hsa-miR-4440     | 4.97 | 0     | 2.67  | 1.43  | 15.78 | 4.4  | 3.98 | 55.16 | 2.48 | 9.34 | 9.89   | 4.77  | 4.18  | 2.48   | 6.88   | 4.24 | 3.1   | 7.18  | 5.38 | 6.25  | 10.021 | 5.435  | -0.883 | 0.1231 |        |
| hsa-miR-133a-3p  | 8.79 | 20.78 | 0     | 14.92 | 33    | 8.31 | 3.98 | 21.58 | 8.69 | 7.37 | 5.93   | 7.42  | 1.79  | 111.19 | 131.62 | 5.88 | 15.93 | 13.61 | 1.43 | 8.04  | 12.742 | 30.284 | 1.249  | 0.1233 |        |
| hsa-miR-3150b-5p | 0    | 0     | 0     | 0     | 0     | 0    | 0    | 0     | 0    | 1.47 | 0      | 0.53  | 0     | 1.24   | 0.98   | 0    | 0     | 0.6   | 1.43 | 2.38  | 0.147  | 0.716  | 2.2841 | 0.1283 |        |
| hsa-miR-1289     | 1.15 | 1.39  | 0     | 1.43  | 2.87  | 0    | 1.14 | 0.4   | 1.24 | 0    | 0      | 1.06  | 0     | 0      | 0      | 0.71 | 0.88  | 0.9   | 0    | 0     | 0.962  | 0.355  | -1.438 | 0.1287 |        |
| hsa-miR-548a-3p  | 0    | 0     | 0     | 0.58  | 0     | 1.96 | 1.14 | 0     | 1.24 | 0    | 0      | 0     | 0     | 0      | 0      | 0.94 | 0     | 0     | 0    | 0     | 0.492  | 0.094  | -2.388 | 0.1288 |        |
| hsa-miR-1273g-2p | 4.2  | 0     | 1.78  | 2.3   | 4.3   | 0.98 | 0    | 0.8   | 0    | 0    | 7.91   | 1.06  | 1.79  | 6.21   | 1.96   | 1.65 | 0.88  | 4.93  | 1.79 | 5.66  | 1.436  | 3.384  | 1.2367 | 0.1291 |        |
| hsa-miR-345-3p   | 0.38 | 0     | 6.54  | 0.86  | 8.61  | 0    | 0.28 | 2.4   | 0.62 | 0    | 0      | 0     | 0     | 1.24   | 1.96   | 0.24 | 0.88  | 0.45  | 1.08 | 0     | 1.969  | 0.585  | -1.751 | 0.1293 |        |
| hsa-miR-4726-5p  | 0    | 0     | 4.46  | 1.43  | 0     | 0    | 0.57 | 11.19 | 2.48 | 0.49 | 1.98   | 1.59  | 1.19  | 3.11   | 0      | 0.24 | 0.44  | 0.3   | 0    | 0     | 2.062  | 0.885  | -1.22  | 0.1311 |        |
| hsa-miR-541-5p   | 0.76 | 0     | 0     | 0.29  | 0     | 0    | 0    | 0     | 0    | 0    | 0      | 0     | 1.79  | 0.62   | 0      | 0    | 0.88  | 0.75  | 0    | 1.49  | 0.105  | 0.553  | 2.3969 | 0.1318 |        |
| hsa-miR-184      | 2.29 | 1.39  | 0     | 6.89  | 1.43  | 4.4  | 8.8  | 7.19  | 4.97 | 4.91 | 3.96   | 2.12  | 3.58  | 0      | 0.98   | 2.59 | 3.98  | 6.28  | 0.72 | 3.87  | 4.227  | 2.808  | -0.59  | 0.1329 |        |
| hsa-miR-6894-5p  | 0    | 0     | 0     | 0     | 0     | 0.49 | 0    | 0     | 0    | 1.47 | 0      | 1.06  | 1.19  | 1.86   | 1.96   | 0.47 | 0.88  | 0     | 0.36 | 0     | 0.196  | 0.778  | 1.9889 | 0.1353 |        |
| hsa-miR-1228-5p  | 2.29 | 3.81  | 24.66 | 2.3   | 50.22 | 5.87 | 4.26 | 46.77 | 5.59 | 11.3 | 144.39 | 10.61 | 16.13 | 71.44  | 92.33  | 8.24 | 3.1   | 9.87  | 4.3  | 21.74 | 15.707 | 38.215 | 1.2827 | 0.1358 |        |
| hsa-miR-379-3p   | 1.15 | 2.77  | 0     | 0     | 0     | 0.49 | 1.14 | 0     | 0.62 | 0    | 3.96   | 0     | 0     | 1.86   | 6.88   | 0.47 | 2.21  | 1.35  | 1.08 | 2.38  | 0.617  | 2.019  | 1.7103 | 0.1377 |        |
| hsa-miR-1227-3p  | 0.38 | 0     | 1.19  | 0.86  | 0     | 0.49 | 0.28 | 0     | 2.48 | 0    | 0      | 0     | 0     | 0      | 0.98   | 0    | 0     | 0.45  | 0.36 | 0     | 0.568  | 0.179  | -1.666 | 0.1378 |        |
| hsa-miR-582-5p   | 0    | 0.35  | 0     | 0     | 0     | 0    | 0.28 | 0     | 0    | 0    | 0      | 0.53  | 1.19  | 1.86   | 0      | 0    | 0     | 0     | 0.72 | 0     | 0.063  | 0.43   | 2.7709 | 0.1389 |        |

|                 |       |       |        |       |        |       |       |       |       |        |        |       |       |        |        |       |       |        |       |        |        |        |        |        |
|-----------------|-------|-------|--------|-------|--------|-------|-------|-------|-------|--------|--------|-------|-------|--------|--------|-------|-------|--------|-------|--------|--------|--------|--------|--------|
| hsa-miR-1229-3p | 0.38  | 0     | 0      | 0.57  | 0      | 0     | 0     | 0     | 0.62  | 0.49   | 0      | 0     | 0     | 0      | 0      | 0.24  | 1.77  | 0.3    | 5.74  | 0      | 0.206  | 0.805  | 1.9663 | 0.1392 |
| hsa-miR-6770-5p | 0.38  | 0     | 2.67   | 0.29  | 0      | 0     | 0.28  | 0     | 0     | 1.47   | 0      | 0     | 0     | 0      | 0      | 0     | 0.88  | 0.45   | 0     | 0      | 0.509  | 0.133  | -1.936 | 0.1422 |
| hsa-miR-1908-5p | 79.51 | 8.31  | 108.43 | 50.22 | 113.36 | 121.3 | 36.06 | 144.3 | 44.08 | 135.15 | 304.61 | 64.69 | 70.49 | 154.05 | 226.89 | 57.66 | 60.61 | 158.63 | 83.21 | 514.97 | 84.072 | 169.58 | 1.0123 | 0.1444 |
| hsa-miR-6724-5p | 0.76  | 1.73  | 2.08   | 0.29  | 1.43   | 0     | 0.57  | 5.2   | 0     | 0.49   | 0      | 2.12  | 4.18  | 15.53  | 2.95   | 0.71  | 0.44  | 0.75   | 0.36  | 1.79   | 1.255  | 2.883  | 1.1999 | 0.1445 |
| hsa-miR-1273h-2 | 57.72 | 15.93 | 32.38  | 22.1  | 55.96  | 48.42 | 34.36 | 35.97 | 19.87 | 36.37  | 209.66 | 60.98 | 24.49 | 54.04  | 48.13  | 13.88 | 49.55 | 52.63  | 30.13 | 159.94 | 35.908 | 70.343 | 0.9701 | 0.1478 |
| hsa-miR-7704    | 1.53  | 0.69  | 20.2   | 1.43  | 21.52  | 1.96  | 2.84  | 25.18 | 4.97  | 2.95   | 33.63  | 7.42  | 6.57  | 17.39  | 4.91   | 5.18  | 0.88  | 28.26  | 1.08  | 97.39  | 8.327  | 20.271 | 1.2835 | 0.1487 |
| hsa-miR-4482-5p | 0     | 0     | 0      | 3.73  | 0      | 0     | 0     | 0     | 2.48  | 0      | 0      | 0.53  | 0     | 0      | 0      | 0.71  | 0     | 0      | 0     | 0      | 0.621  | 0.124  | -2.324 | 0.1495 |
| hsa-miR-4286    | 6.12  | 14.89 | 1.49   | 8.61  | 4.3    | 4.4   | 6.25  | 10.39 | 5.59  | 2.46   | 3.96   | 7.42  | 1.19  | 0.62   | 3.93   | 6.12  | 7.96  | 10.17  | 0.72  | 2.38   | 6.45   | 4.447  | -0.537 | 0.1505 |
| hsa-miR-627-5p  | 1.53  | 1.04  | 16.64  | 0.29  | 0      | 2.93  | 3.98  | 12.39 | 2.48  | 19.66  | 17.8   | 18.03 | 73.48 | 0      | 12.77  | 14.59 | 0.88  | 2.09   | 5.02  | 8.64   | 6.094  | 15.33  | 1.3309 | 0.1519 |
| hsa-miR-656-3p  | 0.76  | 3.12  | 0      | 0.29  | 0      | 0.98  | 0     | 0     | 0.62  | 0      | 0      | 1.59  | 0.6   | 0      | 0      | 4.47  | 2.21  | 0      | 6.1   | 0      | 0.577  | 1.497  | 1.3754 | 0.1521 |
| hsa-miR-6770-3p | 0     | 0     | 1.49   | 0     | 0      | 0     | 0.28  | 0     | 0     | 0.49   | 1.98   | 0.53  | 1.19  | 1.86   | 0.98   | 0     | 0.44  | 0.3    | 0     | 2.38   | 0.226  | 0.966  | 2.0957 | 0.1526 |
| hsa-miR-6500-3p | 1.53  | 0     | 0      | 0     | 2.87   | 0     | 0     | 0     | 0     | 0      | 17.8   | 1.59  | 0     | 0.62   | 0      | 0.47  | 0.88  | 1.05   | 0     | 0      | 0.44   | 2.241  | 2.3486 | 0.154  |
| hsa-miR-6855-5p | 3.44  | 1.04  | 1.49   | 4.59  | 0      | 0.49  | 3.69  | 8.39  | 7.45  | 4.42   | 3.96   | 5.3   | 12.55 | 9.94   | 17.68  | 2.82  | 1.77  | 2.09   | 8.25  | 8.04   | 3.5    | 7.24   | 1.0486 | 0.1544 |
| hsa-miR-182-3p  | 0.38  | 0.69  | 0      | 0     | 2.87   | 0.49  | 1.14  | 2.8   | 1.86  | 0      | 0      | 1.59  | 0     | 0      | 0      | 0.47  | 0.44  | 0.15   | 0.72  | 0      | 1.023  | 0.337  | -1.602 | 0.1561 |
| hsa-miR-3605-5p | 4.59  | 7.27  | 8.02   | 4.59  | 5.74   | 6.36  | 5.68  | 4.8   | 5.59  | 4.42   | 7.91   | 2.12  | 3.58  | 0      | 1.96   | 2.35  | 5.31  | 5.38   | 3.95  | 11.02  | 5.706  | 4.358  | -0.389 | 0.1577 |
| hsa-miR-4717-3p | 0.76  | 0     | 0.3    | 0     | 0      | 1.47  | 0.28  | 0     | 0.62  | 0      | 1.98   | 0     | 1.19  | 0      | 0      | 0.94  | 1.33  | 1.64   | 2.15  | 0      | 0.343  | 0.923  | 1.4281 | 0.1592 |
| hsa-miR-193b-3p | 3.44  | 16.97 | 12.77  | 4.3   | 4.3    | 4.4   | 3.69  | 28.78 | 2.48  | 1.97   | 0      | 15.91 | 1.79  | 0      | 0.98   | 11.53 | 7.52  | 2.99   | 0.36  | 0.3    | 8.31   | 4.138  | -1.006 | 0.1598 |
| hsa-miR-4701-5p | 0.38  | 1.39  | 0      | 0.57  | 0      | 1.47  | 0.85  | 0     | 2.48  | 0      | 0      | 1.06  | 0     | 0      | 0      | 0.71  | 0.44  | 0.45   | 0     | 0      | 0.714  | 0.266  | -1.425 | 0.16   |
| hsa-miR-1276    | 0     | 0     | 0      | 0.86  | 0      | 1.96  | 2.56  | 0     | 0     | 2.46   | 0      | 1.59  | 0     | 0      | 0      | 0     | 0.44  | 0.3    | 0.36  | 0      | 0.784  | 0.269  | -1.543 | 0.1608 |
| hsa-miR-296-5p  | 5.35  | 5.19  | 0.59   | 10.33 | 0      | 13.69 | 7.67  | 9.59  | 5.59  | 3.93   | 0      | 5.83  | 2.99  | 0      | 0      | 6.82  | 4.42  | 2.69   | 6.46  | 2.38   | 6.193  | 3.159  | -0.971 | 0.1635 |

|                   |       |       |       |       |        |       |       |       |       |       |        |       |       |       |        |       |       |        |       |        |        |        |        |        |
|-------------------|-------|-------|-------|-------|--------|-------|-------|-------|-------|-------|--------|-------|-------|-------|--------|-------|-------|--------|-------|--------|--------|--------|--------|--------|
| hsa-miR-181a-2-3p | 42.81 | 36.36 | 19.61 | 28.7  | 130.58 | 39.62 | 55.37 | 46.37 | 41.6  | 31.45 | 249.22 | 53.56 | 53.77 | 35.41 | 45.18  | 54.83 | 25.66 | 139.35 | 25.82 | 189.72 | 47.247 | 87.252 | 0.885  | 0.166  |
| hsa-miR-6847-5p   | 0     | 0.35  | 1.19  | 0.57  | 10.04  | 0.49  | 0.85  | 0.8   | 0.62  | 0     | 0      | 0     | 0.6   | 3.11  | 0      | 0.24  | 0     | 0.15   | 0     | 0      | 1.491  | 0.41   | -1.863 | 0.1668 |
| hsa-miR-143-5p    | 5.73  | 5.89  | 12.18 | 4.88  | 8.61   | 4.4   | 4.54  | 16.79 | 4.97  | 0.98  | 27.69  | 13.79 | 7.17  | 15.53 | 26.52  | 10.83 | 10.62 | 10.91  | 1.79  | 5.66   | 6.897  | 13.051 | 0.9201 | 0.1675 |
| hsa-miR-3174      | 0.76  | 0.35  | 0     | 0     | 0      | 0     | 0     | 0     | 0     | 0.49  | 0      | 1.59  | 0.6   | 0     | 0      | 1.18  | 1.77  | 0.45   | 0     | 0      | 0.16   | 0.559  | 1.8048 | 0.1695 |
| hsa-miR-4747-5p   | 0.38  | 0     | 0     | 0     | 0      | 0     | 0.28  | 0.8   | 0     | 0     | 0      | 0     | 1.19  | 3.73  | 0      | 0.94  | 0     | 0      | 0     | 0      | 0.146  | 0.586  | 2.0049 | 0.1723 |
| hsa-miR-580-3p    | 0     | 0     | 5.35  | 0.86  | 0      | 1.47  | 1.14  | 0.8   | 0     | 0     | 0      | 0.53  | 0     | 0     | 0      | 0.24  | 0.44  | 0      | 1.43  | 0      | 0.962  | 0.264  | -1.866 | 0.173  |
| hsa-miR-4670-5p   | 0     | 0     | 0     | 0     | 0      | 0     | 0.28  | 0     | 0     | 0     | 9.89   | 0     | 0     | 0     | 0      | 0     | 0.44  | 0      | 0     | 0      | 0.028  | 1.033  | 5.2053 | 0.1739 |
| hsa-miR-4449      | 0.38  | 0     | 2.67  | 0     | 1.43   | 1.47  | 0.57  | 0     | 0     | 0     | 0      | 0.53  | 0.6   | 0     | 1.96   | 0     | 1.33  | 0.6    | 1.08  | 12.81  | 0.652  | 1.891  | 1.5362 | 0.1748 |
| hsa-miR-4676-3p   | 1.53  | 0.35  | 0     | 0.57  | 2.87   | 0.49  | 0.28  | 0     | 1.24  | 0.98  | 0      | 3.18  | 0     | 0     | 1.96   | 0.47  | 2.21  | 1.64   | 1.43  | 7.45   | 0.831  | 1.834  | 1.1421 | 0.1751 |
| hsa-miR-708-5p    | 0.38  | 0.35  | 0.59  | 0     | 0      | 0     | 0     | 0     | 0     | 0     | 0      | 0     | 0     | 0.62  | 6.88   | 0     | 0     | 0.3    | 0     | 0      | 0.132  | 0.78   | 2.5629 | 0.176  |
| hsa-miR-1185-1-3p | 4.59  | 1.04  | 0     | 0.29  | 0      | 0.98  | 0.85  | 0     | 0.62  | 0.98  | 3.96   | 0     | 2.39  | 0     | 0      | 1.18  | 2.65  | 4.78   | 2.51  | 5.96   | 0.935  | 2.343  | 1.3253 | 0.1767 |
| hsa-miR-4510      | 1.53  | 0.35  | 0.3   | 0     | 1.43   | 0     | 0     | 0     | 0.62  | 0.49  | 0      | 0     | 0     | 0     | 0      | 0.24  | 0.44  | 0.6    | 0     | 0      | 0.472  | 0.128  | -1.883 | 0.1772 |
| hsa-miR-203a-3p   | 6.88  | 9     | 7.43  | 4.02  | 0      | 4.4   | 3.69  | 49.56 | 1.86  | 0.49  | 0      | 5.83  | 1.19  | 36.65 | 135.55 | 3.06  | 5.31  | 11.36  | 6.46  | 2.08   | 8.733  | 20.749 | 1.2485 | 0.1805 |
| hsa-miR-532-3p    | 22.17 | 29.09 | 19.01 | 43.62 | 34.44  | 25.92 | 35.78 | 44.77 | 33.53 | 27.52 | 7.91   | 39.77 | 22.1  | 7.45  | 14.73  | 47.54 | 15.93 | 36.33  | 8.25  | 31.87  | 31.585 | 23.188 | -0.446 | 0.1819 |
| hsa-miR-4792      | 0.38  | 0     | 2.38  | 0     | 4.3    | 1.47  | 1.42  | 6     | 0     | 0     | 11.87  | 1.59  | 0.6   | 3.73  | 3.93   | 2.12  | 0     | 4.19   | 0     | 14.3   | 1.595  | 4.233  | 1.4081 | 0.1824 |
| hsa-miR-3186-3p   | 0.38  | 0.69  | 0     | 1.15  | 1.43   | 0     | 0.28  | 0     | 0.62  | 0     | 0      | 0     | 0     | 0     | 0      | 0.24  | 0.44  | 0.75   | 0     | 0      | 0.455  | 0.143  | -1.67  | 0.185  |
| hsa-miR-4507      | 1.53  | 0     | 0.3   | 0     | 4.3    | 0     | 0     | 0     | 0.62  | 0     | 5.93   | 0     | 1.19  | 4.35  | 3.93   | 0     | 0     | 0      | 0     | 5.66   | 0.675  | 2.106  | 1.6415 | 0.1857 |
| hsa-miR-7705      | 0     | 0.69  | 0     | 0     | 0      | 0     | 0.28  | 0.8   | 0.62  | 0     | 0      | 0     | 0     | 0     | 0      | 0.24  | 0     | 0      | 0     | 0      | 0.239  | 0.024  | -3.316 | 0.1867 |
| hsa-miR-6505-5p   | 0.38  | 0     | 0     | 0.29  | 4.3    | 0     | 0     | 0     | 1.86  | 0     | 1.98   | 0     | 0     | 0     | 0      | 0.47  | 0     | 0.3    | 0     | 0      | 0.683  | 0.275  | -1.313 | 0.1868 |

|                 |        |        |       |        |        |        |        |        |        |       |       |       |       |       |       |       |        |        |        |       |        |        |        |        |
|-----------------|--------|--------|-------|--------|--------|--------|--------|--------|--------|-------|-------|-------|-------|-------|-------|-------|--------|--------|--------|-------|--------|--------|--------|--------|
| hsa-miR-449a    | 0.76   | 0      | 0     | 0      | 0      | 0      | 0      | 0      | 0      | 0     | 0     | 0     | 0.6   | 0     | 5.89  | 0.24  | 0      | 0      | 0      | 0     | 0.076  | 0.673  | 3.1465 | 0.1881 |
| hsa-miR-133b    | 0      | 1.39   | 0     | 2.01   | 4.3    | 0.98   | 0.28   | 2.4    | 0      | 0.49  | 0     | 0     | 0.6   | 9.32  | 13.75 | 1.88  | 0.88   | 2.39   | 0      | 0.3   | 1.185  | 2.912  | 1.2971 | 0.1886 |
| hsa-miR-5090    | 0.38   | 0.69   | 0     | 0      | 5.74   | 1.47   | 1.14   | 5.2    | 0.62   | 1.47  | 0     | 1.06  | 0.6   | 0     | 4.91  | 0.24  | 0      | 0.6    | 0      | 0     | 1.671  | 0.741  | -1.173 | 0.1886 |
| hsa-miR-3913-5p | 29.43  | 21.82  | 20.2  | 19.52  | 101.88 | 19.07  | 28.11  | 103.93 | 21.73  | 40.79 | 37.58 | 31.29 | 41.22 | 17.39 | 45.18 | 48.48 | 19.02  | 23.77  | 5.74   | 17.27 | 40.648 | 28.694 | -0.502 | 0.1896 |
| hsa-miR-3909    | 11.09  | 3.12   | 0     | 6.89   | 8.61   | 7.83   | 6.53   | 0      | 7.45   | 2.46  | 0     | 6.36  | 1.79  | 0     | 0     | 5.88  | 7.08   | 4.49   | 1.79   | 0.89  | 5.398  | 2.828  | -0.933 | 0.1916 |
| hsa-miR-6882-3p | 0.38   | 0      | 0     | 0      | 2.87   | 0      | 0.85   | 0      | 0      | 1.97  | 1.98  | 0     | 0     | 0     | 0     | 0     | 0.44   | 0      | 0      | 0     | 0.607  | 0.242  | -1.327 | 0.192  |
| hsa-miR-542-5p  | 0      | 0.35   | 5.05  | 0      | 0      | 0      | 0      | 0      | 0      | 0     | 0     | 0     | 0     | 0     | 0.98  | 0     | 0      | 0      | 0      | 0     | 0.54   | 0.098  | -2.462 | 0.1923 |
| hsa-miR-6782-3p | 0      | 0      | 0     | 0      | 0      | 0      | 0.28   | 0      | 0      | 0     | 0     | 1.06  | 1.79  | 0     | 0     | 0     | 0      | 0.3    | 0      | 0     | 0.028  | 0.315  | 3.4919 | 0.1934 |
| hsa-miR-5100    | 3.82   | 0      | 4.16  | 1.72   | 5.74   | 1.47   | 0.28   | 0.4    | 2.48   | 0     | 3.96  | 1.06  | 0.6   | 0     | 3.93  | 1.41  | 1.33   | 8.52   | 5.02   | 17.57 | 2.007  | 4.34   | 1.1127 | 0.1956 |
| hsa-miR-7974    | 0      | 0.35   | 0     | 1.43   | 0      | 0      | 0      | 0      | 0.62   | 0     | 0     | 0     | 0     | 0     | 0     | 0     | 0      | 0      | 0      | 0.3   | 0.24   | 0.03   | -3     | 0.1972 |
| hsa-miR-223-3p  | 460.25 | 1700.2 | 16.64 | 192.86 | 64.57  | 274.39 | 211.84 | 103.93 | 372.55 | 50.13 | 75.16 | 492.1 | 88.42 | 0.62  | 56.97 | 199.8 | 607.84 | 326.09 | 102.94 | 68.5  | 344.74 | 201.84 | -0.772 | 0.1979 |
| hsa-miR-4689    | 0      | 0      | 4.16  | 0      | 0      | 0      | 0      | 0      | 0      | 0     | 0     | 0     | 0     | 0     | 0     | 0.47  | 0      | 0      | 0      | 0     | 0.416  | 0.047  | -3.146 | 0.1989 |
| hsa-miR-581     | 0.76   | 0.35   | 0     | 0      | 0      | 1.47   | 1.42   | 0      | 0      | 0     | 0     | 1.59  | 1.19  | 0     | 0.98  | 2.12  | 0.88   | 0.9    | 1.08   | 0     | 0.4    | 0.874  | 1.1276 | 0.1991 |
| hsa-miR-6843-3p | 0      | 0      | 0     | 0.29   | 0      | 0.49   | 0.85   | 0      | 0      | 0.49  | 11.87 | 0     | 0     | 0     | 0     | 0     | 0.44   | 1.05   | 1.08   | 0     | 0.212  | 1.444  | 2.7679 | 0.2004 |
| hsa-miR-3120-3p | 15.67  | 1.73   | 0     | 4.88   | 11.48  | 10.27  | 6.82   | 4.4    | 3.1    | 4.91  | 39.56 | 9.55  | 5.38  | 3.11  | 17.68 | 5.41  | 18.58  | 20.48  | 3.23   | 6.55  | 6.326  | 12.953 | 1.0339 | 0.2012 |
| hsa-miR-136-5p  | 1.53   | 4.85   | 14.85 | 0.86   | 0      | 4.4    | 1.7    | 4      | 3.1    | 0.49  | 7.91  | 6.36  | 13.14 | 7.45  | 11.79 | 3.29  | 3.98   | 4.34   | 4.66   | 5.96  | 3.578  | 6.888  | 0.9449 | 0.2021 |
| hsa-miR-490-5p  | 0.38   | 0      | 2.38  | 0      | 0      | 0      | 0      | 2.8    | 1.24   | 0     | 0     | 0     | 0.6   | 0     | 0.98  | 0.47  | 0      | 0.15   | 0      | 0     | 0.68   | 0.22   | -1.628 | 0.2028 |
| hsa-miR-887-3p  | 0      | 0      | 2.38  | 0.29   | 0      | 0      | 0.28   | 0      | 0.62   | 0     | 3.96  | 1.59  | 1.79  | 4.35  | 0.98  | 0.47  | 0      | 0.15   | 0      | 0     | 0.357  | 1.329  | 1.8963 | 0.2036 |
| hsa-miR-6836-5p | 0.38   | 0      | 0     | 0      | 4.3    | 0.49   | 0.28   | 2      | 0      | 0.49  | 0     | 0     | 0     | 1.86  | 0     | 0     | 0      | 0      | 0      | 0     | 0.794  | 0.186  | -2.094 | 0.2045 |
| hsa-miR-624-5p  | 1.53   | 4.85   | 0     | 1.15   | 0      | 1.96   | 0.85   | 0      | 1.24   | 0     | 0     | 0.53  | 0     | 0     | 0     | 1.41  | 1.77   | 0.9    | 0.36   | 0     | 1.158  | 0.497  | -1.22  | 0.205  |

|                   |        |        |       |       |        |        |        |        |        |        |        |        |        |       |        |        |        |        |       |        |        |        |        |        |
|-------------------|--------|--------|-------|-------|--------|--------|--------|--------|--------|--------|--------|--------|--------|-------|--------|--------|--------|--------|-------|--------|--------|--------|--------|--------|
| hsa-miR-6825-5p   | 0.38   | 0.35   | 0     | 0.29  | 0      | 0.49   | 0      | 3.2    | 0      | 0      | 0      | 0      | 0      | 0     | 0      | 0.47   | 0      | 0.75   | 0     | 0      | 0.471  | 0.122  | -1.949 | 0.2055 |
| hsa-miR-124-3p    | 0.76   | 0      | 2.08  | 0.57  | 0      | 0      | 0.57   | 2      | 0      | 0.49   | 0      | 0      | 0      | 0     | 0      | 0.47   | 0.88   | 1.35   | 0     | 0      | 0.647  | 0.27   | -1.261 | 0.2059 |
| hsa-miR-6852-5p   | 41.29  | 5.89   | 10.69 | 25.54 | 48.79  | 37.17  | 38.9   | 33.98  | 21.73  | 25.06  | 189.88 | 35     | 16.13  | 41.62 | 60.9   | 17.65  | 46.01  | 60.85  | 29.77 | 47.95  | 28.904 | 54.576 | 0.917  | 0.2063 |
| hsa-miR-6730-5p   | 0.38   | 0      | 2.08  | 0     | 0      | 0.49   | 0      | 0      | 0      | 0      | 0      | 0      | 0      | 0     | 0      | 0      | 0      | 0.45   | 0     | 0      | 0.295  | 0.045  | -2.713 | 0.2083 |
| hsa-miR-28-5p     | 85.25  | 45.02  | 4.16  | 30.71 | 31.57  | 53.8   | 36.06  | 22.38  | 19.25  | 25.06  | 225.49 | 44.54  | 32.26  | 16.77 | 36.34  | 32.48  | 80.07  | 143.53 | 23.31 | 77.44  | 35.326 | 71.223 | 1.0116 | 0.2089 |
| hsa-miR-2115-5p   | 3.44   | 4.5    | 9.51  | 1.43  | 7.17   | 0.49   | 1.7    | 0.8    | 2.48   | 1.47   | 33.63  | 7.42   | 2.99   | 4.97  | 6.88   | 0.94   | 4.42   | 2.39   | 0     | 19.36  | 3.299  | 8.3    | 1.3311 | 0.2102 |
| hsa-miR-543       | 157.5  | 10.04  | 6.54  | 38.17 | 25.83  | 123.25 | 65.03  | 4.4    | 66.44  | 108.61 | 201.75 | 68.94  | 34.05  | 13.67 | 45.18  | 27.3   | 123.87 | 173.28 | 295.9 | 172.75 | 60.581 | 115.67 | 0.9331 | 0.2113 |
| hsa-miR-1255b-5p  | 66.9   | 59.91  | 35.35 | 81.22 | 66.01  | 85.1   | 130.05 | 148.29 | 105.55 | 167.58 | 51.43  | 107.65 | 129.04 | 20.5  | 57.95  | 118.84 | 103.52 | 58.46  | 28.33 | 37.83  | 94.596 | 71.355 | -0.407 | 0.213  |
| hsa-miR-1294      | 27.14  | 15.93  | 19.31 | 26.4  | 58.83  | 27.88  | 34.36  | 31.58  | 18.63  | 54.06  | 23.74  | 25.45  | 17.92  | 14.29 | 22.59  | 32.71  | 27.43  | 34.84  | 20.8  | 25.91  | 31.412 | 24.568 | -0.355 | 0.2141 |
| hsa-miR-146b-3p   | 21.79  | 45.36  | 65.06 | 13.49 | 34.44  | 22.01  | 19.03  | 24.38  | 13.66  | 16.22  | 67.25  | 25.45  | 11.95  | 29.2  | 19.64  | 16.47  | 20.79  | 25.87  | 3.23  | 30.98  | 27.544 | 25.083 | -0.135 | 0.2162 |
| hsa-miR-431-5p    | 5.35   | 11.08  | 0     | 2.3   | 1.43   | 2.93   | 5.68   | 5.6    | 6.21   | 3.44   | 53.4   | 3.18   | 2.39   | 3.73  | 9.82   | 5.65   | 2.65   | 15.1   | 2.51  | 14     | 4.402  | 11.243 | 1.3528 | 0.2171 |
| hsa-miR-433-3p    | 43.96  | 15.93  | 35.35 | 12.91 | 14.35  | 57.71  | 31.52  | 7.59   | 49.05  | 105.17 | 39.56  | 36.59  | 33.46  | 29.82 | 46.16  | 28.24  | 28.31  | 44.41  | 176.1 | 177.22 | 37.354 | 63.987 | 0.7765 | 0.2208 |
| hsa-miR-219a-1-3p | 3.82   | 0.69   | 7.43  | 3.16  | 2.87   | 7.83   | 4.54   | 6.4    | 2.48   | 4.42   | 13.85  | 5.83   | 8.36   | 4.35  | 7.86   | 5.41   | 4.42   | 4.19   | 2.87  | 23.53  | 4.364  | 8.067  | 0.8864 | 0.2219 |
| hsa-miR-149-5p    | 4.2    | 0.35   | 2.08  | 0.86  | 0      | 7.34   | 2.27   | 0      | 0      | 0      | 0      | 4.24   | 1.19   | 9.32  | 5.89   | 3.29   | 3.98   | 4.49   | 0     | 5.66   | 1.71   | 3.806  | 1.1543 | 0.2225 |
| hsa-miR-4667-5p   | 0      | 0      | 6.24  | 1.15  | 5.74   | 1.47   | 0.85   | 4.8    | 0.62   | 0.98   | 0      | 1.59   | 1.19   | 1.86  | 2.95   | 0.71   | 0.88   | 0.45   | 1.43  | 0      | 2.185  | 1.106  | -0.982 | 0.2238 |
| hsa-miR-362-3p    | 0.38   | 5.54   | 0     | 1.15  | 0      | 0      | 1.42   | 0      | 2.48   | 0      | 0      | 0.53   | 0      | 0     | 0      | 1.88   | 1.77   | 0.3    | 0     | 0      | 1.097  | 0.448  | -1.292 | 0.2242 |
| hsa-miR-5584-5p   | 0      | 0      | 0     | 0     | 0      | 0      | 1.14   | 1.2    | 0      | 0.49   | 0      | 1.06   | 0      | 0     | 0.98   | 0      | 0.44   | 0.3    | 0     | 8.04   | 0.283  | 1.082  | 1.9348 | 0.226  |
| hsa-miR-6733-5p   | 0.76   | 0.69   | 0     | 0.29  | 0      | 0.49   | 1.14   | 0      | 0      | 0.98   | 9.89   | 1.06   | 0.6    | 0     | 0      | 1.65   | 0      | 1.05   | 1.79  | 0      | 0.435  | 1.604  | 1.8826 | 0.2276 |
| hsa-miR-342-5p    | 308.11 | 402.73 | 90.01 | 211.8 | 142.06 | 269.01 | 226.03 | 344.95 | 263.89 | 344.01 | 306.58 | 260.9  | 148.76 | 88.83 | 283.86 | 228.27 | 174.74 | 321    | 95.05 | 392.55 | 260.26 | 230.05 | -0.178 | 0.2308 |
| hsa-miR-6866-5p   | 6.88   | 6.58   | 11.59 | 2.01  | 0      | 7.34   | 3.41   | 1.6    | 1.86   | 6.88   | 0      | 4.77   | 4.18   | 0     | 0      | 4      | 3.98   | 3.29   | 2.51  | 8.04   | 4.815  | 3.077  | -0.646 | 0.2309 |

|                  |        |        |        |        |        |        |        |        |        |        |        |        |        |        |        |        |        |        |        |        |        |        |        |        |
|------------------|--------|--------|--------|--------|--------|--------|--------|--------|--------|--------|--------|--------|--------|--------|--------|--------|--------|--------|--------|--------|--------|--------|--------|--------|
| hsa-miR-3183     | 1.15   | 0      | 0      | 0.29   | 1.43   | 0      | 0.28   | 0      | 0      | 0      | 0      | 0      | 1.19   | 0      | 6.88   | 0.24   | 0      | 1.2    | 0      | 0      | 0.315  | 0.951  | 1.5941 | 0.2363 |
| hsa-miR-517b-3p  | 0      | 0      | 0      | 15.5   | 5.74   | 0.98   | 0      | 0      | 0      | 0      | 0      | 3.18   | 0      | 0      | 0      | 0.94   | 3.54   | 1.2    | 0      | 0      | 2.222  | 0.886  | -1.327 | 0.2374 |
| hsa-miR-517a-3p  | 0      | 0      | 0      | 15.5   | 5.74   | 0.98   | 0      | 0      | 0      | 0      | 0      | 3.18   | 0      | 0      | 0      | 0.94   | 3.54   | 1.2    | 0      | 0      | 2.222  | 0.886  | -1.327 | 0.2376 |
| hsa-miR-548b-5p  | 0      | 0.35   | 0      | 0      | 0      | 0      | 0.57   | 1.6    | 0      | 0      | 0      | 0      | 0      | 0      | 0      | 0.24   | 0      | 0      | 0      | 0      | 0.252  | 0.024  | -3.392 | 0.2382 |
| hsa-miR-4731-5p  | 1.15   | 0      | 0      | 0.57   | 0      | 1.47   | 0.28   | 3.2    | 1.24   | 2.95   | 0      | 0      | 0      | 0      | 0.98   | 0.47   | 0.44   | 0.15   | 0.72   | 2.98   | 1.086  | 0.574  | -0.92  | 0.2394 |
| hsa-miR-30c-2-3p | 3.06   | 1.39   | 5.94   | 2.58   | 0      | 1.47   | 1.99   | 0      | 1.24   | 0      | 27.69  | 3.18   | 2.39   | 3.73   | 1.96   | 0.94   | 4.87   | 4.19   | 1.43   | 0.89   | 1.767  | 5.127  | 1.5368 | 0.2414 |
| hsa-miR-27b-5p   | 3.82   | 2.42   | 0      | 2.87   | 2.87   | 3.42   | 1.99   | 2      | 1.24   | 3.93   | 23.74  | 4.77   | 0.6    | 0      | 4.91   | 1.88   | 4.42   | 7.33   | 0      | 16.38  | 2.456  | 6.403  | 1.3824 | 0.2415 |
| hsa-miR-1273f    | 2.68   | 0.69   | 11.59  | 0.57   | 15.78  | 4.4    | 1.99   | 4.4    | 0      | 1.97   | 49.45  | 2.12   | 3.58   | 7.45   | 3.93   | 1.88   | 0.44   | 6.28   | 1.08   | 31.57  | 4.407  | 10.778 | 1.2902 | 0.2415 |
| hsa-miR-6839-5p  | 1.15   | 0      | 2.38   | 0      | 0      | 0      | 0      | 0.8    | 0      | 0.49   | 0      | 0      | 1.19   | 4.97   | 0      | 0      | 0      | 0.15   | 0      | 9.83   | 0.482  | 1.614  | 1.7435 | 0.2416 |
| hsa-miR-1283     | 0.38   | 0      | 0      | 4.59   | 0      | 0      | 0      | 0      | 0      | 0      | 0      | 0      | 1.19   | 0      | 0      | 0      | 0      | 0      | 0      | 0      | 0.497  | 0.119  | -2.062 | 0.242  |
| hsa-miR-3194-3p  | 1.15   | 1.73   | 0.59   | 1.15   | 5.74   | 0      | 3.12   | 0      | 1.24   | 0      | 0      | 1.06   | 0      | 0      | 0      | 1.41   | 1.33   | 2.39   | 0      | 0      | 1.472  | 0.619  | -1.25  | 0.2427 |
| hsa-miR-371a-5p  | 0      | 0      | 0      | 0      | 0      | 0.49   | 0      | 0      | 0      | 0      | 0      | 1.59   | 0.6    | 0      | 0      | 0      | 0      | 0      | 0      | 0.6    | 0.049  | 0.279  | 2.5094 | 0.2452 |
| hsa-miR-29a-3p   | 334.49 | 2020.2 | 31.19  | 222.7  | 166.46 | 351.66 | 229.72 | 99.93  | 198.69 | 46.69  | 270.98 | 372.79 | 185.2  | 32.3   | 95.28  | 385.47 | 442.83 | 469.62 | 148.84 | 173.05 | 370.17 | 257.64 | -0.523 | 0.2452 |
| hsa-miR-744-5p   | 2164.8 | 222.66 | 1437.5 | 635.68 | 990.13 | 1459.5 | 857.28 | 1167.6 | 712.18 | 986.33 | 4832.2 | 1333.7 | 766.48 | 1585.9 | 1962.5 | 447.6  | 1323.2 | 1924.8 | 1228.4 | 3336.1 | 1063.4 | 1874.1 | 0.8175 | 0.2455 |
| hsa-miR-2277-3p  | 0.38   | 0.69   | 1.49   | 0.29   | 2.87   | 0      | 1.14   | 1.2    | 0      | 0      | 0      | 0      | 0      | 7.45   | 4.91   | 1.18   | 0.44   | 0.75   | 0      | 2.38   | 0.806  | 1.711  | 1.086  | 0.2478 |
| hsa-miR-378b     | 0.38   | 1.04   | 15.45  | 2.3    | 18.65  | 0      | 3.41   | 6      | 0.62   | 3.44   | 23.74  | 12.2   | 13.74  | 14.29  | 12.77  | 6.59   | 5.31   | 1.94   | 1.08   | 4.47   | 5.129  | 9.613  | 0.9063 | 0.2491 |
| hsa-miR-4723-3p  | 0.38   | 0      | 0      | 0.29   | 0      | 0      | 0      | 0      | 0      | 0      | 0      | 0      | 0      | 0      | 0      | 0.24   | 0.44   | 0.45   | 1.79   | 0      | 0.067  | 0.292  | 2.1237 | 0.2524 |
| hsa-miR-6501-5p  | 4.97   | 4.5    | 77.83  | 6.89   | 21.52  | 0.49   | 3.98   | 98.33  | 6.83   | 4.42   | 3.96   | 9.55   | 29.27  | 36.65  | 18.66  | 9.41   | 6.64   | 7.03   | 1.08   | 11.32  | 22.976 | 13.357 | -0.783 | 0.2526 |
| hsa-miR-520a-3p  | 0      | 1.04   | 0.3    | 4.3    | 0      | 1.47   | 0.28   | 0      | 0      | 0      | 0      | 0.53   | 0      | 1.86   | 0      | 0      | 0.44   | 0.75   | 0      | 0      | 0.739  | 0.358  | -1.046 | 0.2527 |
| hsa-miR-654-5p   | 24.47  | 15.24  | 27.92  | 14.35  | 15.78  | 27.88  | 21.58  | 16.79  | 40.36  | 90.43  | 265.05 | 20.68  | 24.49  | 67.09  | 49.11  | 13.65  | 15.93  | 38.13  | 48.06  | 105.44 | 29.48  | 64.763 | 1.1354 | 0.2548 |

|                   |        |        |        |       |        |        |        |       |        |        |        |        |        |        |        |        |        |        |       |        |        |        |        |        |        |
|-------------------|--------|--------|--------|-------|--------|--------|--------|-------|--------|--------|--------|--------|--------|--------|--------|--------|--------|--------|-------|--------|--------|--------|--------|--------|--------|
| hsa-miR-153-3p    | 0      | 0.7    | 0      | 0.58  | 0      | 0      | 0      | 2.4   | 0      | 0      | 0      | 1.06   | 0      | 0      | 0      | 0      | 0      | 0      | 0     | 0      | 0.368  | 0.106  | -1.796 | 0.2557 |        |
| hsa-miR-597-5p    | 0      | 0      | 2.38   | 0     | 0      | 0      | 0.28   | 0     | 0      | 0      | 0      | 0      | 0      | 0      | 0      | 0      | 0.44   | 0      | 0     | 0      | 0.266  | 0.044  | -2.596 | 0.2576 |        |
| hsa-miR-134-5p    | 478.6  | 162.75 | 6092.3 | 138.9 | 1752.1 | 407.91 | 502.04 | 556.4 | 418.49 | 2288.2 | 11047  | 475.13 | 1091.5 | 7028.1 | 5288.3 | 425.72 | 410.1  | 435.53 | 513.6 | 3388.8 | 1279.8 | 3010.4 | 1.2341 | 0.2584 |        |
| hsa-miR-5088-5p   | 0      | 0      | 0      | 0     | 0      | 0      | 0.28   | 0     | 0      | 0      | 7.91   | 0      | 0.6    | 0      | 0      | 0      | 0      | 0      | 0     | 0      | 0.028  | 0.851  | 4.9257 | 0.2585 |        |
| hsa-miR-219a-2-3p | 0      | 0      | 2.97   | 0     | 0      | 0      | 0      | 2.4   | 0      | 1.47   | 0      | 0      | 0      | 0      | 0      | 0      | 0.44   | 0      | 1.08  | 0.3    | 0.684  | 0.182  | -1.91  | 0.2588 |        |
| hsa-miR-6761-5p   | 0.76   | 0.69   | 3.27   | 0     | 1.43   | 0      | 0      | 0     | 0.62   | 3.93   | 0      | 0      | 1.19   | 0      | 0.98   | 0.47   | 0.44   | 0      | 1.08  | 0      | 1.07   | 0.416  | -1.363 | 0.2589 |        |
| hsa-miR-4781-3p   | 1.91   | 4.5    | 0      | 2.58  | 1.43   | 2.93   | 1.42   | 0.4   | 2.48   | 0.49   | 5.93   | 4.24   | 3.58   | 0      | 13.75  | 2.59   | 3.54   | 4.63   | 0.72  | 0.6    | 1.814  | 3.958  | 1.1256 | 0.2596 |        |
| hsa-miR-34b-3p    | 0.38   | 0.69   | 0      | 0.29  | 0      | 0.49   | 0      | 0     | 1.24   | 0      | 0      | 0.53   | 0      | 0      | 0      | 0.24   | 0      | 0      | 0     | 0      | 0.309  | 0.077  | -2.005 | 0.261  |        |
| hsa-miR-4725-3p   | 0      | 0      | 0      | 0.29  | 0      | 0      | 0.28   | 0     | 0      | 0      | 5.93   | 0      | 0      | 0      | 0      | 0      | 0      | 0      | 0     | 0      | 2.08   | 0.057  | 0.801  | 3.8128 | 0.2611 |
| hsa-miR-4433b-5p  | 277.91 | 36.01  | 4.46   | 92.41 | 24.39  | 115.43 | 80.65  | 35.57 | 69.54  | 111.56 | 37.58  | 112.95 | 15.53  | 21.12  | 73.67  | 29.89  | 160.15 | 135.31 | 594.3 | 116.46 | 84.793 | 129.7  | 0.6131 | 0.2613 |        |
| hsa-miR-3614-5p   | 2.68   | 2.08   | 11.88  | 3.73  | 41.61  | 4.4    | 6.82   | 33.98 | 6.83   | 6.88   | 235.38 | 18.56  | 10.75  | 3.73   | 17.68  | 2.35   | 6.64   | 6.88   | 3.23  | 24.72  | 12.089 | 32.992 | 1.4484 | 0.2624 |        |
| hsa-miR-548u      | 0.76   | 1.73   | 0      | 1.15  | 0      | 3.42   | 0.28   | 0     | 0.62   | 0.98   | 0      | 1.59   | 0.6    | 0      | 0      | 1.65   | 0.44   | 0      | 0     | 0      | 0.894  | 0.428  | -1.063 | 0.2626 |        |
| hsa-miR-4728-3p   | 0      | 0      | 0      | 0.86  | 0      | 0      | 0      | 0     | 0      | 0      | 0      | 0.53   | 0      | 0.62   | 0      | 0.71   | 0.44   | 0.75   | 0.72  | 0      | 0.086  | 0.377  | 2.1322 | 0.2628 |        |
| hsa-miR-4492      | 0.38   | 0      | 2.08   | 0.57  | 10.04  | 0.98   | 0.28   | 3.2   | 1.24   | 0.49   | 5.93   | 0.53   | 0      | 8.7    | 5.89   | 0.24   | 0      | 0.75   | 0.72  | 16.98  | 1.926  | 3.974  | 1.045  | 0.2657 |        |
| hsa-miR-4446-5p   | 0.38   | 0      | 0      | 0.29  | 0      | 0      | 0.57   | 0     | 0.62   | 0      | 0      | 0      | 0      | 0      | 0      | 0      | 0      | 0.3    | 0     | 0      | 0.186  | 0.03   | -2.632 | 0.267  |        |
| hsa-miR-619-5p    | 13.38  | 4.85   | 0.89   | 5.45  | 67.44  | 10.27  | 6.82   | 9.19  | 7.45   | 10.32  | 168.13 | 9.55   | 13.14  | 13.04  | 13.75  | 5.65   | 11.5   | 10.76  | 9.68  | 32.17  | 13.606 | 28.737 | 1.0787 | 0.2673 |        |
| hsa-miR-193a-3p   | 0.38   | 0      | 2.97   | 0     | 0      | 0      | 0      | 2.4   | 0      | 0      | 0      | 0.53   | 0      | 0      | 0.98   | 0.24   | 0      | 0      | 0     | 0      | 0.575  | 0.175  | -1.716 | 0.2674 |        |
| hsa-miR-6740-5p   | 0      | 0      | 7.13   | 0     | 1.43   | 0      | 0.28   | 0     | 0.62   | 0.49   | 3.96   | 0.53   | 0      | 0      | 0      | 0.24   | 0.88   | 0      | 0     | 1.19   | 0.995  | 0.68   | -0.549 | 0.2674 |        |
| hsa-miR-211-3p    | 0      | 0      | 0      | 0     | 0      | 0      | 0.28   | 0     | 0      | 0      | 0      | 0      | 0      | 0      | 4.91   | 0      | 0      | 0      | 0     | 0      | 0.028  | 0.491  | 4.1322 | 0.2681 |        |
| hsa-miR-574-5p    | 14.14  | 12.81  | 118.53 | 9.18  | 127.71 | 18.1   | 18.74  | 30.78 | 8.07   | 46.2   | 694.26 | 27.57  | 32.26  | 109.95 | 64.83  | 17.65  | 17.7   | 25.57  | 13.63 | 31.87  | 40.426 | 103.53 | 1.3567 | 0.2691 |        |

|                  |        |        |        |        |        |        |        |        |        |        |        |        |       |        |        |        |        |        |        |        |        |        |        |        |
|------------------|--------|--------|--------|--------|--------|--------|--------|--------|--------|--------|--------|--------|-------|--------|--------|--------|--------|--------|--------|--------|--------|--------|--------|--------|
| hsa-miR-7849-3p  | 1.91   | 0.35   | 0      | 0      | 1.43   | 0.49   | 0      | 0.4    | 0      | 1.47   | 0      | 0.53   | 1.19  | 0      | 0      | 1.41   | 1.77   | 1.79   | 1.43   | 2.38   | 0.605  | 1.05   | 0.7954 | 0.2695 |
| hsa-miR-451b     | 4.97   | 7.62   | 0      | 6.03   | 1.43   | 8.31   | 5.4    | 1.2    | 3.1    | 0.98   | 0      | 4.77   | 0.6   | 0      | 0.98   | 3.53   | 3.54   | 6.88   | 2.87   | 1.19   | 3.904  | 2.436  | -0.68  | 0.2703 |
| hsa-miR-143-3p   | 1278.3 | 1287.8 | 352.33 | 582.87 | 404.66 | 1672.7 | 680.66 | 303.78 | 753.16 | 220.66 | 3417.9 | 1333.7 | 461.8 | 256.55 | 799.53 | 961.57 | 1868.2 | 2832.2 | 583.18 | 1411.5 | 753.7  | 1392.6 | 0.8857 | 0.2703 |
| hsa-miR-1292-3p  | 0.38   | 0      | 0.3    | 0      | 0      | 0      | 0      | 0      | 0      | 0      | 0      | 0.53   | 0     | 0      | 0      | 0      | 0      | 0      | 0      | 4.17   | 0.068  | 0.47   | 2.7891 | 0.2706 |
| hsa-miR-4533     | 1.53   | 1.73   | 8.32   | 1.15   | 21.52  | 1.47   | 4.83   | 1.2    | 0.62   | 9.83   | 9.89   | 1.06   | 1.79  | 3.11   | 13.75  | 1.65   | 1.77   | 0.9    | 0      | 3.57   | 5.22   | 3.749  | -0.478 | 0.2711 |
| hsa-miR-500b-3p  | 1.15   | 0.35   | 0      | 0.29   | 0      | 0.49   | 1.42   | 0      | 0      | 0      | 0      | 0.53   | 0.6   | 0      | 0      | 0.71   | 1.77   | 0.75   | 0      | 5.66   | 0.37   | 1.002  | 1.4373 | 0.2715 |
| hsa-miR-6735-3p  | 0.38   | 0.35   | 0      | 0.57   | 2.87   | 0      | 1.14   | 2.4    | 0      | 0      | 0      | 0.53   | 0     | 0      | 0      | 0      | 0      | 0.45   | 0      | 2.08   | 0.771  | 0.306  | -1.333 | 0.2716 |
| hsa-miR-2355-3p  | 16.44  | 10.73  | 32.08  | 6.6    | 10.04  | 8.31   | 10.51  | 10.79  | 4.97   | 4.91   | 43.52  | 20.68  | 14.94 | 31.06  | 41.25  | 5.41   | 23.45  | 21.23  | 1.08   | 7.74   | 11.538 | 21.036 | 0.8665 | 0.272  |
| hsa-miR-3620-5p  | 4.2    | 0      | 4.46   | 0.57   | 10.04  | 0      | 0.28   | 3.2    | 3.1    | 0.49   | 15.82  | 0.53   | 2.39  | 14.91  | 8.84   | 1.65   | 0.44   | 2.69   | 0      | 8.64   | 2.634  | 5.591  | 1.0859 | 0.2721 |
| hsa-miR-6812-3p  | 0      | 0      | 0      | 0.57   | 0      | 0      | 0      | 0      | 0      | 0      | 0      | 0      | 0     | 0      | 0      | 0.24   | 0      | 0.45   | 2.15   | 0      | 0.057  | 0.284  | 2.3169 | 0.2733 |
| hsa-miR-3130-3p  | 13.76  | 1.39   | 0      | 3.73   | 5.74   | 1.96   | 1.99   | 21.98  | 4.35   | 0.49   | 27.69  | 18.03  | 11.35 | 3.11   | 1.96   | 10.83  | 4.87   | 1.2    | 3.23   | 27.4   | 5.539  | 10.967 | 0.9855 | 0.2733 |
| hsa-miR-6726-3p  | 0      | 0      | 0      | 0.29   | 0      | 1.47   | 0.57   | 0      | 0.62   | 0      | 0      | 0      | 0.6   | 1.86   | 0      | 0.94   | 0      | 1.05   | 2.15   | 0      | 0.295  | 0.66   | 1.1618 | 0.2737 |
| hsa-miR-129-2-3p | 0      | 0.35   | 0      | 0      | 0      | 0.49   | 0      | 0      | 0      | 0.49   | 0      | 0      | 0     | 0      | 0      | 0      | 0      | 0.15   | 0      | 0      | 0.133  | 0.015  | -3.148 | 0.2758 |
| hsa-miR-4443     | 0      | 0.35   | 3.27   | 1.15   | 4.3    | 0.49   | 0.85   | 4.8    | 0.62   | 1.47   | 13.85  | 0.53   | 0.6   | 6.21   | 2.95   | 0.71   | 1.33   | 1.2    | 0.72   | 11.62  | 1.73   | 3.972  | 1.1991 | 0.2782 |
| hsa-miR-3184-5p  | 0.38   | 0      | 0      | 0.29   | 0      | 0      | 0      | 0      | 0      | 0      | 0      | 0      | 0     | 0      | 0      | 0.47   | 0      | 0.3    | 0.72   | 1.19   | 0.067  | 0.268  | 2      | 0.2796 |
| hsa-miR-3682-3p  | 2.29   | 1.04   | 0.89   | 0.86   | 0      | 1.47   | 1.14   | 1.2    | 0      | 2.46   | 1.98   | 0      | 0.6   | 0      | 0      | 0.47   | 0.44   | 0.9    | 1.08   | 2.68   | 1.135  | 0.815  | -0.478 | 0.28   |
| hsa-miR-1224-5p  | 22.55  | 5.89   | 75.46  | 14.35  | 58.83  | 10.27  | 9.37   | 75.15  | 23.59  | 42.76  | 53.4   | 8.48   | 25.09 | 83.24  | 21.61  | 16.24  | 5.75   | 17.04  | 8.25   | 22.93  | 33.822 | 26.203 | -0.368 | 0.28   |
| hsa-miR-642b-5p  | 1.15   | 0.35   | 0      | 0.57   | 0      | 0      | 0.57   | 0      | 0      | 0      | 0      | 0      | 0     | 0      | 0      | 0      | 0.44   | 0.6    | 0      | 0      | 0.264  | 0.104  | -1.344 | 0.2824 |
| hsa-miR-5585-3p  | 0      | 0      | 2.38   | 0.29   | 1.43   | 0      | 0      | 3.6    | 0      | 0.49   | 0      | 0      | 0     | 1.86   | 0.98   | 0.24   | 0      | 0.15   | 0      | 0      | 0.819  | 0.323  | -1.342 | 0.2826 |
| hsa-miR-5698     | 0.38   | 0      | 0      | 0.29   | 0      | 0.49   | 0      | 2.4    | 0      | 0.49   | 0      | 0.53   | 0.6   | 0      | 0      | 0      | 0      | 0.15   | 0      | 0      | 0.405  | 0.128  | -1.662 | 0.2827 |

|                 |        |        |        |        |        |        |        |        |        |        |        |        |        |        |        |        |        |        |        |        |        |        |        |        |
|-----------------|--------|--------|--------|--------|--------|--------|--------|--------|--------|--------|--------|--------|--------|--------|--------|--------|--------|--------|--------|--------|--------|--------|--------|--------|
| hsa-miR-4433a-2 | 0      | 0.69   | 0      | 0      | 0      | 0.98   | 0.57   | 0.8    | 0      | 0.49   | 5.93   | 0      | 0.6    | 0.62   | 1.96   | 0.71   | 0.88   | 0.15   | 0.36   | 0.3    | 0.353  | 1.151  | 1.7051 | 0.2832 |
| hsa-miR-181d-3p | 0      | 0.35   | 0      | 0.57   | 0      | 0      | 0.28   | 0      | 0      | 0      | 0      | 0      | 0      | 0      | 0      | 0      | 0      | 0.15   | 0      | 0      | 0.12   | 0.015  | -3     | 0.2837 |
| hsa-miR-4763-5p | 0      | 0      | 0      | 0.29   | 0      | 0.49   | 0.28   | 1.2    | 0.62   | 1.47   | 0      | 1.59   | 0.6    | 8.08   | 0      | 0.94   | 0.44   | 0      | 0      | 0      | 0.435  | 1.165  | 1.4212 | 0.2845 |
| hsa-miR-3195    | 0      | 0      | 0      | 0      | 0      | 0      | 0      | 1.2    | 0.62   | 0      | 0      | 0      | 0      | 0      | 0.98   | 0      | 0      | 0.3    | 0.36   | 4.77   | 0.182  | 0.641  | 1.8164 | 0.2846 |
| hsa-miR-4508    | 655.21 | 79.99  | 2772.3 | 863.83 | 3550.1 | 1176.3 | 611.37 | 5036.8 | 1476.5 | 985.34 | 1455.8 | 826.17 | 1083.1 | 6671.6 | 2708   | 1463.5 | 309.67 | 3184.2 | 1486.3 | 9189.6 | 1720.8 | 2837.8 | 0.7217 | 0.285  |
| hsa-miR-127-5p  | 3.82   | 2.77   | 25.25  | 0      | 0      | 2.45   | 4.26   | 9.19   | 1.24   | 6.39   | 112.74 | 1.59   | 9.56   | 17.39  | 13.75  | 3.77   | 1.33   | 3.29   | 0      | 13.7   | 5.537  | 17.712 | 1.6776 | 0.2855 |
| hsa-miR-485-5p  | 41.29  | 11.77  | 30.3   | 17.51  | 34.44  | 44.02  | 34.08  | 19.59  | 31.05  | 156.77 | 296.69 | 42.42  | 34.65  | 73.92  | 86.44  | 18.83  | 27.87  | 36.48  | 93.97  | 127.48 | 42.082 | 83.875 | 0.995  | 0.2873 |
| hsa-miR-651-5p  | 8.79   | 12.47  | 0      | 3.44   | 1.43   | 8.8    | 5.4    | 2.8    | 9.93   | 6.88   | 0      | 10.61  | 4.78   | 0      | 7.86   | 17.41  | 22.12  | 15.25  | 19.73  | 3.87   | 5.994  | 10.163 | 0.7617 | 0.2879 |
| hsa-miR-212-5p  | 0      | 1.39   | 0      | 2.3    | 0      | 0.49   | 1.42   | 2      | 2.48   | 0.49   | 0      | 0      | 0.6    | 0      | 0      | 1.65   | 1.33   | 0.9    | 1.08   | 0      | 1.057  | 0.556  | -0.927 | 0.2937 |
| hsa-miR-23a-3p  | 1157.5 | 4060.8 | 364.8  | 671.84 | 400.36 | 1288.8 | 808.15 | 444.48 | 1195.3 | 454.09 | 801.07 | 1425.4 | 425.36 | 119.27 | 242.61 | 1282.6 | 1846.5 | 1575.4 | 341.8  | 452.42 | 1084.6 | 851.24 | -0.35  | 0.2949 |
| hsa-miR-3180-5p | 0.76   | 0      | 0      | 0.29   | 0      | 0      | 0      | 0      | 0      | 0.49   | 0      | 0.53   | 0      | 0      | 0      | 0      | 0      | 1.2    | 0.72   | 2.68   | 0.154  | 0.513  | 1.736  | 0.2959 |
| hsa-miR-135a-5p | 0      | 1.38   | 0      | 1.14   | 0      | 0      | 0.56   | 0      | 0      | 0      | 0      | 0      | 0      | 0      | 1.96   | 1.42   | 0.88   | 3.58   | 0.72   | 0      | 0.308  | 0.856  | 1.4747 | 0.2976 |
| hsa-miR-556-3p  | 0      | 0.69   | 0      | 0.29   | 0      | 0      | 0      | 0      | 0      | 0      | 0      | 0      | 0      | 0      | 0      | 0      | 0      | 0.15   | 0      | 0      | 0.098  | 0.015  | -2.708 | 0.2985 |
| hsa-miR-7641    | 7.26   | 7.27   | 7.43   | 15.5   | 57.4   | 10.27  | 16.75  | 26.38  | 14.28  | 16.71  | 15.82  | 25.98  | 18.52  | 18.01  | 7.86   | 19.53  | 7.96   | 40.67  | 19.01  | 93.82  | 17.925 | 26.718 | 0.5758 | 0.2989 |
| hsa-miR-6826-5p | 0      | 0      | 0      | 0      | 0      | 0      | 0      | 0      | 0.62   | 0      | 0      | 0.53   | 0      | 0      | 0      | 0.24   | 0.44   | 1.05   | 0      | 0      | 0.062  | 0.226  | 1.866  | 0.299  |
| hsa-miR-4732-5p | 122.71 | 112.89 | 29.11  | 208.35 | 189.42 | 174.12 | 148.23 | 54.76  | 226.63 | 319.93 | 73.18  | 158.02 | 100.96 | 41.62  | 190.55 | 144.49 | 152.62 | 97.93  | 166.78 | 119.73 | 158.62 | 124.59 | -0.348 | 0.299  |
| hsa-miR-6833-3p | 0.38   | 0      | 0      | 1.15   | 0      | 0.49   | 0.57   | 0      | 0      | 0.98   | 0      | 0      | 0      | 0      | 0      | 0.47   | 0.44   | 0.3    | 0.36   | 0      | 0.357  | 0.157  | -1.185 | 0.3001 |
| hsa-miR-542-3p  | 8.79   | 7.62   | 0.59   | 2.58   | 0      | 5.38   | 3.98   | 2      | 4.35   | 1.97   | 0      | 7.42   | 3.58   | 4.97   | 20.63  | 9.18   | 10.62  | 3.74   | 4.66   | 0.3    | 3.726  | 6.51   | 0.805  | 0.3004 |
| hsa-miR-4454    | 0      | 0.35   | 0      | 0      | 0      | 0.49   | 0.28   | 1.2    | 0      | 0.49   | 1.98   | 2.65   | 0      | 0      | 0      | 1.18   | 0.44   | 0.45   | 0      | 1.79   | 0.281  | 0.849  | 1.5952 | 0.3019 |
| hsa-miR-7114-5p | 0.38   | 0      | 0      | 0      | 1.43   | 0      | 0      | 0      | 0      | 0.98   | 9.89   | 0      | 0      | 0      | 0      | 0      | 0      | 0      | 1.08   | 2.68   | 0.279  | 1.365  | 2.2906 | 0.3023 |

|                 |       |       |        |       |        |       |       |       |       |        |        |       |       |        |        |       |       |       |       |       |        |        |        |        |
|-----------------|-------|-------|--------|-------|--------|-------|-------|-------|-------|--------|--------|-------|-------|--------|--------|-------|-------|-------|-------|-------|--------|--------|--------|--------|
| hsa-miR-616-3p  | 1.91  | 1.73  | 0      | 1.43  | 4.3    | 3.42  | 1.7   | 0.4   | 2.48  | 3.44   | 0      | 0     | 2.39  | 1.86   | 0      | 0.94  | 2.21  | 3.29  | 1.08  | 0.89  | 2.081  | 1.266  | -0.717 | 0.3023 |
| hsa-miR-3690    | 1.53  | 1.04  | 0      | 3.44  | 0      | 1.96  | 1.14  | 2     | 4.35  | 0      | 23.74  | 9.55  | 0.6   | 0      | 3.93   | 0.47  | 0     | 6.28  | 0.72  | 2.68  | 1.546  | 4.797  | 1.6336 | 0.3039 |
| hsa-miR-370-5p  | 0.76  | 0     | 0      | 0     | 0      | 0.49  | 0     | 0     | 0     | 0      | 0      | 0     | 0     | 0      | 0      | 0     | 0     | 0.15  | 0     | 0     | 0.125  | 0.015  | -3.059 | 0.304  |
| hsa-miR-6775-3p | 0.76  | 0     | 0      | 0     | 1.43   | 0     | 0.28  | 1.2   | 0.62  | 0.49   | 0      | 0     | 0     | 0      | 0      | 0     | 0.44  | 0.15  | 0     | 1.19  | 0.478  | 0.178  | -1.425 | 0.3041 |
| hsa-miR-877-5p  | 12.61 | 9     | 13.96  | 14.92 | 17.22  | 17.61 | 7.67  | 15.19 | 9.93  | 12.29  | 3.96   | 11.14 | 7.17  | 8.7    | 11.79  | 9.41  | 10.17 | 10.76 | 10.04 | 23.83 | 13.04  | 10.697 | -0.286 | 0.3043 |
| hsa-miR-6758-3p | 0     | 0     | 0      | 0.29  | 0      | 0     | 0     | 0     | 0     | 0      | 0      | 0     | 0     | 0      | 0      | 0     | 0.44  | 0     | 1.43  | 0     | 0.029  | 0.187  | 2.6889 | 0.3047 |
| hsa-miR-3133    | 0     | 0.35  | 0      | 0.29  | 0      | 0     | 0     | 0     | 1.24  | 0      | 0      | 0     | 0     | 0      | 0      | 0.24  | 0     | 0.3   | 0     | 0     | 0.188  | 0.054  | -1.8   | 0.3049 |
| hsa-miR-518e-3p | 0     | 0.35  | 0      | 0.29  | 0      | 0.49  | 0     | 0     | 0     | 0      | 0      | 0     | 0     | 3.11   | 0      | 0     | 0     | 0.15  | 0     | 1.79  | 0.113  | 0.505  | 2.16   | 0.3052 |
| hsa-miR-6729-5p | 0     | 0.35  | 5.64   | 0.86  | 2.87   | 0.98  | 0.57  | 11.99 | 1.24  | 2.46   | 9.89   | 2.12  | 2.39  | 15.53  | 5.89   | 3.06  | 0.88  | 3.14  | 0     | 11.32 | 2.696  | 5.422  | 1.008  | 0.3087 |
| hsa-miR-326     | 27.91 | 29.43 | 49.91  | 18.08 | 54.53  | 16.14 | 20.16 | 75.55 | 29.8  | 17.69  | 126.59 | 55.15 | 21.51 | 87.59  | 101.17 | 24    | 23.45 | 66.23 | 13.63 | 33.95 | 33.92  | 55.327 | 0.7058 | 0.3096 |
| hsa-miR-6861-5p | 0     | 0     | 2.67   | 0.29  | 0      | 0.98  | 0.57  | 0     | 0     | 0      | 0      | 1.06  | 0     | 1.86   | 3.93   | 0.47  | 0.44  | 0.15  | 2.51  | 0     | 0.451  | 1.042  | 1.2082 | 0.3099 |
| hsa-miR-4772-3p | 1.15  | 11.43 | 0      | 0.57  | 0      | 2.45  | 1.14  | 0     | 1.86  | 0      | 0      | 3.18  | 1.19  | 0      | 0      | 0.94  | 2.21  | 2.69  | 0     | 0     | 1.86   | 1.021  | -0.865 | 0.3113 |
| hsa-miR-6791-5p | 0     | 0     | 0      | 0.29  | 1.43   | 0     | 0     | 0     | 0     | 0.49   | 0      | 0.53  | 0.6   | 0      | 0.98   | 0     | 0     | 0.15  | 0     | 3.28  | 0.221  | 0.554  | 1.3258 | 0.3126 |
| hsa-miR-193b-5p | 26.76 | 10.73 | 250.13 | 8.9   | 117.67 | 51.36 | 35.21 | 94.73 | 14.28 | 178.39 | 270.98 | 65.22 | 83.04 | 118.03 | 51.08  | 26.83 | 20.79 | 22.13 | 17.22 | 31.57 | 78.816 | 70.689 | -0.157 | 0.3134 |
| hsa-miR-660-3p  | 0.38  | 0.69  | 0.59   | 0.86  | 0      | 0.49  | 0.85  | 7.99  | 0.62  | 1.47   | 0      | 0     | 2.39  | 1.24   | 1.96   | 1.65  | 0     | 0.45  | 0     | 0     | 1.394  | 0.769  | -0.858 | 0.3137 |
| hsa-miR-3688-3p | 6.12  | 10.04 | 6.83   | 3.73  | 18.65  | 4.4   | 7.95  | 13.99 | 6.21  | 1.97   | 0      | 5.83  | 7.77  | 2.48   | 5.89   | 11.3  | 10.17 | 6.58  | 1.79  | 0     | 7.989  | 5.181  | -0.625 | 0.3142 |
| hsa-miR-9-5p    | 2.29  | 1.73  | 4.16   | 19.8  | 14.35  | 1.47  | 1.7   | 0.4   | 1.24  | 0      | 3.96   | 4.77  | 4.78  | 8.08   | 2.95   | 0     | 3.54  | 1.64  | 0.72  | 2.98  | 4.714  | 3.342  | -0.496 | 0.3154 |
| hsa-miR-873-3p  | 2.68  | 0     | 27.63  | 1.43  | 86.1   | 5.87  | 2.56  | 37.57 | 8.07  | 9.34   | 5.93   | 0.53  | 24.49 | 13.67  | 14.73  | 3.06  | 3.98  | 6.88  | 4.66  | 23.83 | 18.125 | 10.176 | -0.833 | 0.3156 |
| hsa-miR-3181    | 0.38  | 0     | 0      | 0     | 0      | 0     | 0.28  | 0     | 0     | 0      | 0      | 0     | 0     | 3.11   | 0      | 0     | 0     | 0     | 0     | 0.89  | 0.066  | 0.4    | 2.5995 | 0.3159 |
| hsa-miR-5010-3p | 13.76 | 8.66  | 9.51   | 27.84 | 30.13  | 17.12 | 19.31 | 6.4   | 27.32 | 25.56  | 0      | 19.09 | 10.75 | 1.86   | 14.73  | 8     | 17.25 | 19.29 | 28.69 | 2.98  | 18.561 | 12.264 | -0.598 | 0.318  |

|                  |       |        |        |        |        |        |        |        |       |       |        |        |       |        |        |        |        |        |        |        |        |        |        |        |
|------------------|-------|--------|--------|--------|--------|--------|--------|--------|-------|-------|--------|--------|-------|--------|--------|--------|--------|--------|--------|--------|--------|--------|--------|--------|
| hsa-miR-6798-3p  | 0.76  | 0.35   | 0      | 0.57   | 0      | 0.49   | 0      | 0      | 0     | 0     | 0      | 2.12   | 0     | 0      | 0      | 0.24   | 0.44   | 0.75   | 1.43   | 0      | 0.217  | 0.498  | 1.1985 | 0.3185 |
| hsa-miR-652-5p   | 0     | 0.35   | 0      | 0      | 0      | 0.98   | 0      | 0      | 0.62  | 0     | 0      | 0      | 0     | 0      | 0      | 0      | 0.44   | 0      | 0      | 0      | 0.195  | 0.044  | -2.148 | 0.32   |
| hsa-miR-589-3p   | 0     | 0.69   | 0      | 0.57   | 0      | 0      | 0      | 2      | 0.62  | 0     | 0      | 1.06   | 0     | 0      | 0      | 0.47   | 0      | 0      | 0      | 0      | 0.388  | 0.153  | -1.343 | 0.3229 |
| hsa-miR-215-5p   | 181.2 | 172.79 | 12.77  | 120.25 | 34.44  | 539.97 | 160.44 | 35.57  | 76.37 | 28.01 | 166.15 | 134.16 | 43.61 | 15.53  | 15.72  | 219.09 | 126.08 | 159.83 | 106.88 | 32.17  | 136.18 | 101.92 | -0.418 | 0.3231 |
| hsa-miR-874-3p   | 29.43 | 29.43  | 51.99  | 20.09  | 40.18  | 36.19  | 21.87  | 62.76  | 27.32 | 22.61 | 27.69  | 35.53  | 33.46 | 34.17  | 28.48  | 20.94  | 21.68  | 35.43  | 8.25   | 55.4   | 34.187 | 30.103 | -0.184 | 0.3232 |
| hsa-miR-6848-5p  | 0     | 0.35   | 0      | 0      | 0      | 0      | 0      | 2.4    | 0     | 0     | 0      | 0      | 0     | 0.62   | 0      | 0      | 0      | 0      | 0      | 0      | 0.275  | 0.062  | -2.149 | 0.3234 |
| hsa-miR-1910-3p  | 0.38  | 1.04   | 0      | 0.57   | 0      | 0      | 0      | 0      | 0     | 0     | 0      | 0      | 0     | 0      | 0      | 0      | 0.44   | 0      | 0      | 0      | 0.199  | 0.044  | -2.177 | 0.324  |
| hsa-miR-708-3p   | 6.5   | 10.04  | 14.26  | 2.58   | 11.48  | 18.1   | 7.1    | 5.2    | 4.97  | 2.46  | 65.27  | 8.48   | 8.36  | 3.73   | 15.72  | 12.71  | 10.62  | 8.52   | 4.3    | 21.15  | 8.269  | 15.886 | 0.942  | 0.3242 |
| hsa-miR-6510-3p  | 0     | 0      | 0      | 0      | 0      | 0      | 0      | 0      | 0.62  | 0     | 7.91   | 0      | 0.6   | 0      | 0      | 0.24   | 0      | 0      | 0      | 0      | 0.062  | 0.875  | 3.8189 | 0.3252 |
| hsa-miR-6737-5p  | 0     | 0      | 0      | 0      | 0      | 0      | 0      | 2.4    | 0     | 0.49  | 0      | 0      | 0     | 0.62   | 0      | 0      | 0      | 0      | 0      | 0      | 0.289  | 0.062  | -2.221 | 0.3277 |
| hsa-miR-96-5p    | 39.76 | 125.01 | 11.88  | 43.05  | 162.15 | 19.56  | 23.85  | 31.98  | 33.53 | 10.81 | 9.89   | 50.38  | 39.43 | 13.67  | 40.27  | 52.95  | 54.86  | 49.34  | 20.8   | 2.98   | 50.158 | 33.457 | -0.584 | 0.3283 |
| hsa-miR-4800-5p  | 0.38  | 0      | 2.97   | 0      | 0      | 0      | 0      | 2.8    | 0     | 0     | 0      | 0      | 0     | 0      | 0      | 0.24   | 0      | 0.6    | 0      | 1.79   | 0.615  | 0.263  | -1.226 | 0.3291 |
| hsa-miR-6842-3p  | 54.28 | 23.89  | 77.24  | 41.04  | 218.12 | 53.31  | 54.52  | 177.07 | 50.29 | 56.52 | 712.07 | 80.07  | 53.77 | 116.78 | 219.04 | 35.54  | 43.35  | 65.04  | 19.01  | 218.02 | 80.628 | 156.27 | 0.9547 | 0.3297 |
| hsa-miR-6858-5p  | 0     | 1.04   | 0      | 0.29   | 0      | 0.49   | 0.28   | 0      | 0     | 0     | 0      | 0.53   | 0.6   | 0      | 0      | 0.47   | 0.44   | 0      | 0      | 3.87   | 0.21   | 0.591  | 1.4928 | 0.3326 |
| hsa-miR-16-1-3p  | 0.76  | 0      | 4.46   | 0      | 0      | 0      | 0      | 6      | 0     | 0     | 0      | 0.53   | 0     | 0.62   | 2.95   | 0.71   | 0.44   | 0.45   | 0      | 0      | 1.122  | 0.57   | -0.977 | 0.3338 |
| hsa-miR-324-3p   | 35.17 | 49.52  | 166.66 | 35.87  | 57.4   | 14.18  | 33.22  | 155.49 | 24.84 | 28.5  | 47.47  | 59.92  | 51.38 | 57.77  | 68.76  | 55.77  | 18.58  | 65.49  | 19.01  | 41.1   | 60.085 | 48.525 | -0.308 | 0.3342 |
| hsa-miR-4784     | 0     | 0      | 0.89   | 0.29   | 0      | 0      | 0      | 0      | 1.24  | 0.49  | 0      | 0.53   | 0     | 0      | 4.91   | 0      | 0      | 0      | 0.36   | 4.17   | 0.291  | 0.997  | 1.7766 | 0.3348 |
| hsa-miR-548az-5p | 1.15  | 1.04   | 7.43   | 0      | 0      | 2.93   | 1.14   | 8.39   | 3.1   | 0     | 1.98   | 0.53   | 1.79  | 0      | 0      | 4.24   | 1.77   | 2.84   | 1.08   | 1.49   | 2.518  | 1.572  | -0.68  | 0.3351 |
| hsa-miR-3200-3p  | 3.82  | 12.47  | 1.49   | 10.62  | 7.17   | 1.96   | 9.37   | 9.59   | 4.97  | 0     | 0      | 8.48   | 4.18  | 0      | 0      | 9.18   | 3.54   | 7.92   | 3.59   | 0      | 6.146  | 3.689  | -0.736 | 0.3382 |
| hsa-miR-377-3p   | 0     | 1.73   | 0      | 0      | 0      | 1.96   | 0.57   | 0      | 0     | 0     | 0      | 0.53   | 4.18  | 0      | 0      | 1.88   | 3.1    | 0.3    | 0      | 0      | 0.426  | 0.999  | 1.2296 | 0.3383 |

|                  |        |        |        |        |        |        |        |        |        |        |        |       |        |        |        |        |        |        |        |        |        |        |        |        |
|------------------|--------|--------|--------|--------|--------|--------|--------|--------|--------|--------|--------|-------|--------|--------|--------|--------|--------|--------|--------|--------|--------|--------|--------|--------|
| hsa-miR-1306-3p  | 34.4   | 8.66   | 97.14  | 27.26  | 91.84  | 32.77  | 36.92  | 99.53  | 42.84  | 33.91  | 98.9   | 41.36 | 55.56  | 107.47 | 102.15 | 30.59  | 24.33  | 87.46  | 26.54  | 218.32 | 50.527 | 79.268 | 0.6497 | 0.3402 |
| hsa-miR-4448     | 4.59   | 2.42   | 3.86   | 2.01   | 11.48  | 7.83   | 3.69   | 0.8    | 2.48   | 2.46   | 39.56  | 2.65  | 1.19   | 4.97   | 0      | 2.35   | 1.77   | 11.06  | 1.43   | 25.02  | 4.162  | 9      | 1.1126 | 0.3417 |
| hsa-miR-3180-3p  | 5.36   | 4.16   | 89.12  | 1.72   | 25.82  | 16.62  | 7.96   | 110.32 | 2.48   | 44.22  | 106.8  | 22.28 | 100.36 | 38.52  | 94.3   | 19.3   | 1.76   | 14.66  | 1.44   | 217.42 | 30.778 | 61.684 | 1.003  | 0.3433 |
| hsa-miR-3180     | 5.36   | 4.16   | 89.12  | 1.72   | 25.82  | 16.62  | 7.96   | 110.32 | 2.48   | 44.22  | 106.8  | 22.28 | 100.36 | 38.52  | 94.3   | 19.3   | 1.76   | 14.66  | 1.44   | 217.42 | 30.778 | 61.684 | 1.003  | 0.3434 |
| hsa-miR-942-5p   | 99.77  | 92.11  | 65.65  | 129.72 | 202.33 | 104.67 | 171.51 | 81.54  | 95     | 181.34 | 201.75 | 120.9 | 90.81  | 51.56  | 156.17 | 122.37 | 125.2  | 117.97 | 70.3   | 85.78  | 122.36 | 114.28 | -0.099 | 0.3479 |
| hsa-miR-548at-3p | 0.38   | 1.04   | 0      | 0.57   | 0      | 0      | 0      | 0      | 0      | 0      | 0      | 2.12  | 0      | 0      | 0      | 0.94   | 0      | 0      | 1.79   | 0      | 0.199  | 0.485  | 1.2852 | 0.351  |
| hsa-miR-324-5p   | 21.41  | 23.55  | 68.33  | 21.52  | 1.43   | 12.72  | 29.53  | 91.14  | 25.46  | 5.41   | 3.96   | 48.79 | 35.84  | 32.3   | 6.88   | 26.59  | 12.83  | 30.5   | 7.89   | 13.4   | 30.05  | 21.898 | -0.457 | 0.3513 |
| hsa-miR-1262     | 0      | 0.35   | 0      | 0      | 0      | 0      | 0.28   | 0      | 0      | 0      | 0      | 0.53  | 0      | 0      | 0      | 0.24   | 0.44   | 0.3    | 0.72   | 0      | 0.063  | 0.223  | 1.8236 | 0.3513 |
| hsa-miR-192-3p   | 0      | 1.39   | 0      | 0.29   | 2.87   | 0      | 0.28   | 0      | 0      | 0      | 0      | 0     | 1.19   | 0      | 0      | 0      | 0      | 0.15   | 0      | 0      | 0.483  | 0.134  | -1.85  | 0.3517 |
| hsa-miR-17-5p    | 532.12 | 385.06 | 70.41  | 325.16 | 291.3  | 323.3  | 411.18 | 104.33 | 248.36 | 129.74 | 164.17 | 497.4 | 626.69 | 70.82  | 366.37 | 481.02 | 790.99 | 507.44 | 413.18 | 129.26 | 282.1  | 404.73 | 0.5208 | 0.3519 |
| hsa-miR-556-5p   | 1.15   | 0.69   | 0      | 0.29   | 0      | 0.98   | 0.57   | 0      | 0.62   | 0      | 0      | 1.59  | 0      | 0      | 0      | 0.71   | 2.21   | 3.14   | 0.72   | 0      | 0.43   | 0.837  | 0.9609 | 0.3523 |
| hsa-miR-519c-5p  | 5.71   | 0.35   | 16.02  | 32.45  | 17.22  | 0      | 7.09   | 2.4    | 0      | 0      | 23.76  | 3.18  | 22.08  | 3.11   | 1.96   | 1.91   | 3.08   | 1.8    | 0      | 0      | 8.124  | 6.088  | -0.416 | 0.354  |
| hsa-miR-519b-5p  | 5.71   | 0.35   | 16.02  | 32.45  | 17.22  | 0      | 7.09   | 2.4    | 0      | 0      | 23.76  | 3.18  | 22.08  | 3.11   | 1.96   | 1.91   | 3.08   | 1.8    | 0      | 0      | 8.124  | 6.088  | -0.416 | 0.354  |
| hsa-miR-522-5p   | 5.71   | 0.35   | 16.02  | 32.45  | 17.22  | 0      | 7.09   | 2.4    | 0      | 0      | 23.76  | 3.18  | 22.08  | 3.11   | 1.96   | 1.91   | 3.08   | 1.8    | 0      | 0      | 8.124  | 6.088  | -0.416 | 0.3541 |
| hsa-miR-523-5p   | 5.71   | 0.35   | 16.02  | 32.45  | 17.22  | 0      | 7.09   | 2.4    | 0      | 0      | 23.76  | 3.18  | 22.08  | 3.11   | 1.96   | 1.91   | 3.08   | 1.8    | 0      | 0      | 8.124  | 6.088  | -0.416 | 0.3542 |
| hsa-miR-518e-5p  | 5.71   | 0.35   | 16.02  | 32.45  | 17.22  | 0      | 7.09   | 2.4    | 0      | 0      | 23.76  | 3.18  | 22.08  | 3.11   | 1.96   | 1.91   | 3.08   | 1.8    | 0      | 0      | 8.124  | 6.088  | -0.416 | 0.3543 |
| hsa-miR-519a-5p  | 5.71   | 0.35   | 16.02  | 32.45  | 17.22  | 0      | 7.09   | 2.4    | 0      | 0      | 23.76  | 3.18  | 22.08  | 3.11   | 1.96   | 1.91   | 3.08   | 1.8    | 0      | 0      | 8.124  | 6.088  | -0.416 | 0.3544 |
| hsa-miR-378d     | 39.37  | 32.9   | 1451.2 | 18.65  | 434.8  | 32.28  | 34.64  | 1220.3 | 29.8   | 51.6   | 868.33 | 80.6  | 184    | 626.16 | 292.7  | 84.72  | 29.2   | 147.57 | 13.63  | 295.46 | 334.56 | 262.24 | -0.351 | 0.3545 |
| hsa-miR-5589-5p  | 0      | 0.35   | 0      | 0      | 0      | 0      | 0.28   | 2.4    | 0      | 0      | 0      | 0.53  | 0      | 0      | 0      | 0      | 0      | 0.6    | 0      | 0      | 0.303  | 0.113  | -1.423 | 0.357  |
| hsa-miR-136-3p   | 3.06   | 6.58   | 0.3    | 2.3    | 0      | 1.96   | 3.41   | 3.6    | 2.48   | 1.97   | 1.98   | 2.65  | 6.57   | 1.24   | 8.84   | 5.18   | 4.87   | 6.88   | 3.23   | 0      | 2.566  | 4.144  | 0.6915 | 0.3622 |

|                 |       |       |        |       |       |       |       |       |       |       |       |       |        |        |       |       |        |       |       |       |        |        |        |        |
|-----------------|-------|-------|--------|-------|-------|-------|-------|-------|-------|-------|-------|-------|--------|--------|-------|-------|--------|-------|-------|-------|--------|--------|--------|--------|
| hsa-miR-3182    | 0.76  | 0.69  | 0      | 0     | 0     | 0.98  | 0.28  | 2.4   | 1.86  | 0     | 0     | 0.53  | 0      | 0      | 0     | 0.47  | 0.44   | 3.59  | 0     | 11.91 | 0.697  | 1.694  | 1.2812 | 0.3626 |
| hsa-miR-337-5p  | 0     | 1.39  | 0      | 0     | 0     | 0     | 0.28  | 0     | 0     | 0     | 0     | 0.53  | 0.6    | 0      | 0     | 1.41  | 1.33   | 0.6   | 0     | 0     | 0.167  | 0.447  | 1.4204 | 0.3643 |
| hsa-miR-301a-5p | 3.44  | 1.39  | 0      | 0.57  | 0     | 2.93  | 2.56  | 0     | 0.62  | 0     | 0     | 1.59  | 1.79   | 0      | 0     | 1.65  | 6.19   | 4.93  | 2.51  | 1.19  | 1.151  | 1.985  | 0.7863 | 0.3668 |
| hsa-miR-133a-5p | 0.38  | 0     | 2.08   | 0.29  | 0     | 0     | 0     | 0     | 0     | 0     | 0     | 0     | 0      | 1.24   | 4.91  | 0.24  | 0      | 0     | 0     | 2.68  | 0.275  | 0.907  | 1.7217 | 0.3678 |
| hsa-miR-3939    | 1.53  | 0.35  | 1.49   | 1.43  | 0     | 2.93  | 0.85  | 0.4   | 0.62  | 0.49  | 0     | 1.59  | 0      | 0      | 0     | 1.18  | 0.88   | 1.5   | 1.08  | 0     | 1.009  | 0.623  | -0.696 | 0.368  |
| hsa-miR-1287-5p | 14.53 | 9.7   | 224.88 | 22.67 | 25.83 | 27.88 | 16.47 | 55.96 | 9.31  | 21.62 | 25.71 | 46.66 | 41.82  | 101.25 | 33.4  | 14.83 | 17.7   | 18.39 | 5.38  | 30.08 | 42.885 | 33.522 | -0.355 | 0.3683 |
| hsa-miR-3940-3p | 6.88  | 8.66  | 3.27   | 12.34 | 1.43  | 8.31  | 9.94  | 11.59 | 8.07  | 3.93  | 0     | 12.73 | 8.36   | 3.11   | 0     | 9.65  | 7.96   | 8.67  | 2.51  | 3.87  | 7.442  | 5.686  | -0.388 | 0.3686 |
| hsa-miR-106a-5p | 60.02 | 69.26 | 8.62   | 53.09 | 91.84 | 33.26 | 68.72 | 9.59  | 24.22 | 52.09 | 49.45 | 68.94 | 100.96 | 22.36  | 78.58 | 67.07 | 123.43 | 57.71 | 67.79 | 24.42 | 47.071 | 66.071 | 0.4892 | 0.3687 |
| hsa-miR-450a-5p | 26    | 49.86 | 0.6    | 6.32  | 11.48 | 23.48 | 26.7  | 4     | 16.14 | 7.86  | 0     | 23.34 | 17.92  | 7.46   | 49.12 | 40    | 53.98  | 36.78 | 5.02  | 51.82 | 17.244 | 28.544 | 0.7271 | 0.3698 |
| hsa-miR-429     | 0.76  | 6.23  | 0      | 3.44  | 8.61  | 8.8   | 2.56  | 0     | 2.48  | 0     | 0     | 3.71  | 0.6    | 1.24   | 0.98  | 4.47  | 3.54   | 5.08  | 0.36  | 0     | 3.288  | 1.998  | -0.719 | 0.37   |
| hsa-miR-6777-5p | 0     | 0     | 0      | 0     | 0     | 0     | 0.28  | 0     | 0     | 0     | 0     | 0     | 0      | 0      | 0     | 0     | 0      | 0.45  | 1.08  | 0     | 0.028  | 0.153  | 2.45   | 0.3704 |
| hsa-miR-3692-3p | 0     | 0     | 0      | 0     | 0     | 0     | 0     | 0     | 0.62  | 0.49  | 0     | 1.06  | 1.19   | 0      | 0     | 0     | 0.88   | 0.6   | 0     | 0     | 0.111  | 0.373  | 1.7486 | 0.3707 |
| hsa-miR-145-5p  | 15.67 | 61.98 | 29.71  | 19.23 | 57.4  | 24.94 | 11.93 | 34.78 | 40.98 | 21.13 | 35.6  | 70.53 | 24.49  | 19.88  | 31.43 | 26.36 | 26.54  | 24.22 | 4.66  | 14    | 31.775 | 27.771 | -0.194 | 0.3727 |
| hsa-miR-6804-5p | 0.38  | 0.35  | 0      | 1.15  | 1.43  | 0.98  | 0.85  | 1.2   | 0.62  | 1.47  | 3.96  | 0     | 1.19   | 3.11   | 0.98  | 0.71  | 0.88   | 0.6   | 0.36  | 5.36  | 0.843  | 1.715  | 1.0246 | 0.3735 |
| hsa-miR-4773    | 0     | 0.69  | 0      | 0     | 1.43  | 0.49  | 0.28  | 0     | 0.62  | 1.47  | 0     | 1.06  | 0      | 0      | 0     | 0     | 0      | 0.3   | 0.72  | 0     | 0.498  | 0.208  | -1.26  | 0.3748 |
| hsa-miR-6777-3p | 0.38  | 0     | 0      | 0.57  | 1.43  | 0     | 0     | 0     | 0     | 0.49  | 0     | 0     | 0      | 0      | 0     | 0     | 0      | 0.3   | 0.36  | 0     | 0.287  | 0.066  | -2.121 | 0.3754 |
| hsa-miR-4525    | 0     | 0.35  | 2.97   | 0.86  | 0     | 0.49  | 0     | 11.99 | 0.62  | 0.49  | 0     | 1.59  | 0      | 4.97   | 0     | 0.24  | 0.44   | 0.3   | 1.43  | 0     | 1.777  | 0.897  | -0.986 | 0.3769 |
| hsa-miR-34a-5p  | 0.38  | 1.04  | 0.3    | 2.58  | 1.43  | 0     | 1.14  | 0.4   | 0     | 0     | 0     | 0     | 0      | 0      | 0     | 0     | 1.33   | 0.75  | 0     | 2.68  | 0.727  | 0.476  | -0.611 | 0.3782 |
| hsa-miR-4727-3p | 0.38  | 0     | 0      | 0.29  | 0     | 0     | 0.28  | 0     | 0     | 0     | 0     | 0.53  | 0      | 0      | 0     | 1.18  | 0.44   | 0     | 0     | 0.3   | 0.095  | 0.245  | 1.3668 | 0.3782 |
| hsa-miR-605-3p  | 2.68  | 0.35  | 0      | 0.57  | 0     | 0.49  | 0.28  | 0     | 0     | 0     | 1.98  | 1.06  | 0.6    | 0      | 0     | 0     | 3.1    | 1.2   | 0     | 2.38  | 0.437  | 1.032  | 1.2397 | 0.3784 |

|                 |        |        |        |        |        |        |        |        |        |        |        |        |        |        |        |        |        |        |        |        |        |        |        |        |
|-----------------|--------|--------|--------|--------|--------|--------|--------|--------|--------|--------|--------|--------|--------|--------|--------|--------|--------|--------|--------|--------|--------|--------|--------|--------|
| hsa-miR-2682-5p | 0.38   | 0      | 0      | 0      | 0      | 0      | 0      | 0      | 0      | 0      | 7.91   | 0      | 0      | 0      | 0      | 0      | 0      | 0      | 0      | 0      | 0.038  | 0.791  | 4.3796 | 0.3785 |
| hsa-miR-380-5p  | 0      | 0.35   | 0      | 0      | 0      | 0      | 0      | 0      | 0      | 0      | 7.91   | 0      | 0      | 0      | 0      | 0      | 0      | 0      | 0      | 0      | 0.035  | 0.791  | 4.4983 | 0.3785 |
| hsa-miR-6745    | 0.38   | 0      | 5.94   | 0      | 0      | 0.49   | 0.85   | 0      | 0      | 0.49   | 5.93   | 1.06   | 0      | 0      | 0      | 0      | 0      | 0.9    | 0      | 0      | 0.815  | 0.789  | -0.047 | 0.3796 |
| hsa-miR-6749-3p | 0      | 0      | 0      | 0.86   | 2.87   | 0      | 0.28   | 1.2    | 0      | 0      | 0      | 1.06   | 0      | 0      | 0      | 0      | 0      | 0.15   | 0.36   | 0      | 0.521  | 0.157  | -1.731 | 0.3813 |
| hsa-miR-7151-3p | 1.15   | 0      | 0      | 0.29   | 0      | 0      | 1.42   | 0      | 0      | 0      | 0      | 0      | 0      | 0      | 0      | 0      | 0      | 0      | 0      | 1.19   | 0.286  | 0.119  | -1.265 | 0.3817 |
| hsa-miR-548d-3p | 0      | 0.69   | 0      | 0      | 0      | 0      | 0      | 1.6    | 0      | 0      | 0      | 0      | 0      | 0      | 0      | 0      | 0.44   | 0      | 0      | 0      | 0.229  | 0.044  | -2.38  | 0.3819 |
| hsa-miR-138-5p  | 0.76   | 2.77   | 0.89   | 0.29   | 0      | 1.96   | 0.56   | 1.6    | 0      | 0      | 3.96   | 0      | 0      | 4.96   | 1.96   | 1.42   | 0.88   | 0.9    | 0      | 5.36   | 0.883  | 1.944  | 1.1385 | 0.3824 |
| hsa-miR-339-3p  | 170.11 | 135.4  | 897.75 | 110.2  | 206.64 | 132.55 | 128.35 | 557.2  | 129.15 | 118.44 | 694.26 | 208.4  | 243.15 | 431.73 | 586.39 | 202.86 | 147.76 | 444.35 | 65.99  | 1327.5 | 258.58 | 435.24 | 0.7512 | 0.3826 |
| hsa-miR-7151-5p | 0      | 0      | 0      | 0.29   | 0      | 0.49   | 0      | 0      | 0      | 0      | 0      | 0      | 1.79   | 0      | 0      | 0      | 1.33   | 0      | 0      | 0      | 0.078  | 0.312  | 2      | 0.3834 |
| hsa-miR-4639-5p | 0.76   | 0      | 1.78   | 0.29   | 0      | 0      | 0.85   | 0      | 0.62   | 0      | 0      | 0      | 0.6    | 0      | 0      | 0.71   | 0      | 0.75   | 0      | 0      | 0.43   | 0.206  | -1.062 | 0.3837 |
| hsa-miR-6786-3p | 3.06   | 0      | 0      | 1.15   | 0      | 0.98   | 1.14   | 0      | 0      | 3.93   | 0      | 4.77   | 0      | 0      | 2.95   | 1.18   | 2.21   | 3.14   | 5.02   | 0      | 1.026  | 1.927  | 0.9093 | 0.3851 |
| hsa-miR-6845-5p | 0      | 0      | 0      | 0      | 0      | 0      | 0      | 2      | 0      | 0.98   | 0      | 0      | 0      | 0      | 0      | 0      | 0      | 0.45   | 0.36   | 0      | 0.298  | 0.081  | -1.879 | 0.3881 |
| hsa-miR-3960    | 3.06   | 0.35   | 37.43  | 3.16   | 31.57  | 1.96   | 3.12   | 50.76  | 7.45   | 4.42   | 23.74  | 8.48   | 8.36   | 71.44  | 16.7   | 6.59   | 0.44   | 24.52  | 3.59   | 79.52  | 14.328 | 24.338 | 0.7644 | 0.3892 |
| hsa-miR-3135b   | 0.38   | 0      | 0      | 0      | 0      | 0.49   | 0      | 0      | 0      | 0      | 1.98   | 0      | 0      | 0      | 0.98   | 0      | 0      | 0.3    | 0      | 1.19   | 0.087  | 0.445  | 2.3547 | 0.3893 |
| hsa-miR-409-3p  | 587.93 | 190.11 | 341.63 | 185.68 | 251.12 | 458.78 | 430.49 | 121.11 | 648.85 | 1913.2 | 2589.2 | 414.15 | 436.71 | 547.89 | 732.74 | 275.81 | 410.54 | 686.41 | 1042.6 | 2297   | 512.89 | 943.3  | 0.8791 | 0.3894 |
| hsa-miR-371a-3p | 0      | 0      | 0      | 0      | 0      | 0      | 0      | 0      | 2.48   | 0      | 0      | 0      | 0      | 0      | 0      | 0      | 0.44   | 0      | 0      | 0      | 0.248  | 0.044  | -2.495 | 0.3909 |
| hsa-miR-148b-5p | 7.26   | 11.08  | 0      | 10.62  | 17.22  | 5.87   | 7.38   | 0.4    | 3.1    | 0      | 19.78  | 7.95   | 10.16  | 3.73   | 10.8   | 9.65   | 12.83  | 11.66  | 6.81   | 7.15   | 6.293  | 10.052 | 0.6757 | 0.3926 |
| hsa-miR-8485    | 0      | 0      | 3.86   | 0      | 0      | 0      | 0      | 0      | 0      | 0.49   | 11.87  | 0      | 0      | 0      | 6.88   | 0.47   | 0      | 0.3    | 0.36   | 0      | 0.435  | 1.988  | 2.1922 | 0.3939 |
| hsa-miR-6735-5p | 5.73   | 0.69   | 4.75   | 5.17   | 5.74   | 6.85   | 5.11   | 1.6    | 7.45   | 11.3   | 13.85  | 5.3    | 4.78   | 0.62   | 22.59  | 4      | 6.64   | 4.04   | 10.76  | 19.36  | 5.439  | 9.194  | 0.7574 | 0.3945 |
| hsa-miR-10a-3p  | 4.59   | 6.93   | 2.08   | 2.3    | 7.17   | 5.87   | 1.7    | 0.8    | 0.62   | 5.41   | 1.98   | 10.08  | 5.97   | 0      | 5.89   | 4.47   | 19.91  | 5.53   | 3.23   | 0.3    | 3.747  | 5.736  | 0.6143 | 0.3958 |

|                 |        |        |        |        |        |        |        |        |        |        |        |        |        |        |        |        |        |        |        |        |        |        |        |        |
|-----------------|--------|--------|--------|--------|--------|--------|--------|--------|--------|--------|--------|--------|--------|--------|--------|--------|--------|--------|--------|--------|--------|--------|--------|--------|
| hsa-miR-4649-5p | 0      | 0.35   | 2.38   | 0      | 0      | 0      | 0      | 0      | 0      | 0      | 0      | 0.53   | 0      | 0      | 0      | 0.24   | 0      | 0      | 0      | 0      | 0.273  | 0.077  | -1.826 | 0.3959 |
| hsa-miR-518f-3p | 0      | 0      | 0      | 0      | 0      | 0.49   | 0      | 0      | 0      | 0      | 0      | 0      | 1.79   | 0      | 0      | 0      | 0      | 0.3    | 0      | 0      | 0.049  | 0.209  | 2.0926 | 0.3962 |
| hsa-miR-6809-5p | 0      | 0.69   | 0      | 0      | 0      | 0      | 0.28   | 0      | 0      | 0      | 3.96   | 0.53   | 0      | 0      | 0      | 0      | 0.44   | 0.6    | 0      | 0      | 0.097  | 0.553  | 2.5112 | 0.3972 |
| hsa-miR-6131    | 1.15   | 1.39   | 0.3    | 2.01   | 2.87   | 1.47   | 1.42   | 0.8    | 3.73   | 1.47   | 0      | 3.18   | 0      | 0      | 0.98   | 3.53   | 0.88   | 6.43   | 4.3    | 6.25   | 1.661  | 2.555  | 0.6213 | 0.3975 |
| hsa-miR-194-5p  | 583.35 | 711.26 | 37.13  | 437.94 | 66.01  | 479.81 | 528.74 | 137.5  | 278.79 | 189.7  | 47.47  | 433.77 | 173.25 | 23.61  | 46.16  | 560.8  | 396.38 | 420.88 | 334.99 | 60.16  | 345.02 | 249.75 | -0.466 | 0.3985 |
| hsa-miR-382-3p  | 2.68   | 3.81   | 0      | 2.01   | 0      | 1.47   | 1.99   | 0      | 5.59   | 0.49   | 9.89   | 1.59   | 0      | 0.62   | 6.88   | 2.35   | 2.65   | 2.69   | 8.25   | 0      | 1.804  | 3.492  | 0.9529 | 0.3994 |
| hsa-miR-4470    | 2.68   | 2.42   | 5.05   | 2.01   | 1.43   | 1.47   | 5.4    | 9.99   | 3.73   | 10.81  | 33.63  | 6.89   | 7.77   | 12.42  | 15.72  | 1.18   | 3.98   | 5.68   | 0.36   | 4.17   | 4.499  | 9.18   | 1.0289 | 0.3995 |
| hsa-miR-375     | 727.08 | 231.66 | 449.47 | 336.06 | 2077.9 | 1988.7 | 720.69 | 268.61 | 578.69 | 560.74 | 1123.5 | 589.67 | 243.15 | 181.39 | 394.85 | 629.51 | 392.84 | 628.85 | 1179.3 | 840.51 | 793.95 | 620.35 | -0.356 | 0.4011 |
| hsa-miR-6751-5p | 0      | 0      | 0      | 0.57   | 2.87   | 0      | 0      | 0      | 0      | 0      | 0      | 0.53   | 0      | 0      | 0      | 0      | 0      | 0      | 0      | 0      | 0.344  | 0.053  | -2.698 | 0.4015 |
| hsa-miR-3914    | 0      | 0      | 2.67   | 0      | 0      | 0.49   | 0      | 0      | 1.24   | 0      | 0      | 0      | 1.19   | 0.62   | 0      | 0      | 0      | 0      | 0      | 0      | 0.44   | 0.181  | -1.282 | 0.4027 |
| hsa-miR-378c    | 1.91   | 1.04   | 22.87  | 0.86   | 5.74   | 0.98   | 1.14   | 19.19  | 0.62   | 2.95   | 7.91   | 3.18   | 1.79   | 7.45   | 5.89   | 3.53   | 1.77   | 5.83   | 0      | 8.94   | 5.73   | 4.629  | -0.308 | 0.4064 |
| hsa-miR-584-3p  | 0.76   | 1.73   | 0      | 1.72   | 10.04  | 3.91   | 1.14   | 0      | 1.24   | 0.49   | 0      | 1.06   | 0      | 0      | 0      | 2.59   | 0.88   | 6.28   | 0      | 0      | 2.103  | 1.081  | -0.96  | 0.4069 |
| hsa-miR-4785    | 0.38   | 0.35   | 0.59   | 0      | 0      | 0.49   | 0.57   | 7.19   | 0      | 0      | 0      | 1.06   | 0      | 1.24   | 0.98   | 0      | 0      | 1.35   | 0      | 0.6    | 0.957  | 0.523  | -0.872 | 0.4077 |
| hsa-miR-1270    | 3.06   | 1.04   | 2.97   | 4.59   | 0      | 2.93   | 3.69   | 10.79  | 4.97   | 5.41   | 11.87  | 1.59   | 3.58   | 4.97   | 0.98   | 4.24   | 2.21   | 3.89   | 0      | 5.66   | 3.945  | 3.899  | -0.017 | 0.4083 |
| hsa-miR-33b-5p  | 0.38   | 0      | 0      | 0      | 0      | 0      | 0.57   | 1.2    | 0.62   | 0      | 0      | 0      | 0      | 0      | 0.98   | 0      | 0      | 0      | 0      | 0      | 0.277  | 0.098  | -1.499 | 0.4083 |
| hsa-miR-99b-3p  | 31.35  | 20.78  | 35.05  | 19.52  | 47.35  | 30.81  | 29.53  | 23.98  | 27.32  | 7.86   | 158.24 | 64.16  | 28.08  | 23.61  | 18.66  | 31.77  | 55.3   | 30.95  | 6.46   | 39.02  | 27.355 | 45.625 | 0.738  | 0.409  |
| hsa-miR-511-5p  | 65.37  | 29.78  | 16.93  | 33.58  | 54.53  | 135.97 | 42.03  | 5.6    | 32.29  | 44.72  | 257.14 | 52.5   | 36.44  | 27.33  | 35.36  | 48.48  | 124.75 | 77.3   | 38.02  | 106.03 | 46.08  | 80.335 | 0.8019 | 0.4106 |
| hsa-miR-125a-3p | 29.05  | 9.7    | 44.86  | 12.63  | 47.35  | 32.28  | 23     | 26.78  | 17.39  | 38.82  | 205.71 | 37.65  | 20.31  | 25.47  | 55.99  | 16.71  | 22.56  | 32.15  | 14.35  | 75.65  | 28.186 | 50.655 | 0.8457 | 0.4107 |
| hsa-miR-4659a-5 | 0      | 0      | 0      | 0.29   | 0      | 1.47   | 0      | 0      | 0.62   | 0      | 0      | 0.53   | 0      | 0      | 0      | 0.24   | 0      | 0.15   | 0      | 0      | 0.238  | 0.092  | -1.371 | 0.4121 |
| hsa-miR-5695    | 6.88   | 6.58   | 2.67   | 5.17   | 0      | 3.91   | 5.11   | 5.2    | 4.97   | 0.49   | 5.93   | 3.71   | 3.58   | 0      | 0      | 6.12   | 3.1    | 6.58   | 3.23   | 0      | 4.098  | 3.225  | -0.346 | 0.413  |

|                 |        |        |        |        |        |        |        |        |        |        |        |        |        |        |        |        |        |        |        |        |        |        |        |        |
|-----------------|--------|--------|--------|--------|--------|--------|--------|--------|--------|--------|--------|--------|--------|--------|--------|--------|--------|--------|--------|--------|--------|--------|--------|--------|
| hsa-miR-3175    | 1.15   | 0.35   | 0      | 2.01   | 2.87   | 0.49   | 0      | 6      | 0      | 3.44   | 0      | 3.18   | 0      | 0      | 0      | 0.24   | 0.44   | 0.45   | 0.36   | 5.96   | 1.631  | 1.063  | -0.618 | 0.4135 |
| hsa-miR-610     | 10.32  | 5.54   | 21.98  | 6.89   | 17.22  | 6.85   | 8.8    | 15.99  | 13.04  | 39.32  | 7.91   | 6.36   | 21.51  | 13.67  | 18.66  | 14.12  | 13.27  | 5.38   | 8.61   | 13.11  | 14.595 | 12.26  | -0.252 | 0.414  |
| hsa-miR-154-5p  | 0.76   | 4.5    | 0      | 0.57   | 0      | 0.49   | 1.14   | 0      | 0      | 0.98   | 0      | 1.59   | 0      | 0.62   | 0      | 0.94   | 0.44   | 1.35   | 0.36   | 0      | 0.844  | 0.53   | -0.671 | 0.4141 |
| hsa-miR-504-5p  | 2.68   | 0      | 0      | 0.29   | 0      | 3.42   | 1.42   | 0      | 1.86   | 0      | 1.98   | 0.53   | 0      | 0      | 0      | 0.24   | 0.44   | 1.79   | 1.08   | 0.89   | 0.967  | 0.695  | -0.477 | 0.4142 |
| hsa-miR-6764-5p | 3.82   | 0.69   | 2.38   | 1.72   | 2.87   | 0.98   | 3.69   | 1.2    | 0      | 1.47   | 3.96   | 2.65   | 0.6    | 1.86   | 0.98   | 1.65   | 2.21   | 2.54   | 5.02   | 6.85   | 1.882  | 2.832  | 0.5896 | 0.4149 |
| hsa-miR-548q    | 4.59   | 4.16   | 2.97   | 6.03   | 4.3    | 4.89   | 4.54   | 2.4    | 1.86   | 7.86   | 0      | 3.18   | 9.56   | 0      | 4.91   | 4.94   | 4.87   | 5.08   | 0.72   | 0      | 4.36   | 3.326  | -0.391 | 0.4166 |
| hsa-miR-204-3p  | 4.59   | 3.81   | 27.92  | 3.16   | 27.26  | 5.87   | 2.56   | 42.77  | 13.04  | 12.29  | 114.72 | 8.48   | 5.97   | 18.01  | 27.5   | 5.41   | 4.87   | 18.99  | 6.46   | 69.99  | 14.327 | 28.04  | 0.9687 | 0.4166 |
| hsa-miR-6878-5p | 0      | 0.35   | 1.49   | 0      | 4.3    | 0      | 0.57   | 5.6    | 0.62   | 0.49   | 0      | 0.53   | 0      | 3.73   | 0.98   | 0.24   | 0      | 0.15   | 0      | 1.79   | 1.342  | 0.742  | -0.855 | 0.4171 |
| hsa-miR-3140-5p | 0      | 0.35   | 0      | 0      | 0      | 0      | 0      | 0      | 0      | 0      | 0      | 0      | 0      | 0      | 0      | 0.47   | 0.44   | 0.45   | 0      | 0      | 0.035  | 0.136  | 1.9582 | 0.4195 |
| hsa-miR-139-3p  | 97.86  | 21.82  | 79.02  | 41.04  | 183.68 | 108.09 | 58.21  | 130.71 | 57.12  | 137.11 | 245.27 | 121.96 | 112.31 | 179.52 | 138.49 | 37.42  | 96     | 84.62  | 60.61  | 272.23 | 91.466 | 134.84 | 0.56   | 0.4195 |
| hsa-miR-6721-5p | 0.38   | 1.39   | 0      | 2.3    | 7.17   | 2.93   | 0.85   | 0      | 2.48   | 1.97   | 1.98   | 0      | 0.6    | 0      | 0      | 0      | 1.77   | 1.79   | 4.3    | 0      | 1.947  | 1.044  | -0.899 | 0.4201 |
| hsa-miR-103a-3p | 6974.9 | 3616.2 | 1627.4 | 3573.3 | 3399.5 | 3179.2 | 4740.7 | 2060.1 | 2265.7 | 1628.2 | 7510.3 | 6402.1 | 7234.7 | 1307   | 2287.6 | 4572.8 | 6850.4 | 7037.8 | 2399.8 | 2346.1 | 3306.5 | 4794.9 | 0.5362 | 0.4214 |
| hsa-miR-222-5p  | 0      | 0      | 0      | 0.57   | 0      | 0      | 0      | 0      | 0      | 0      | 0      | 0      | 0      | 0      | 0      | 0.24   | 1.33   | 0.9    | 0      | 0.3    | 0.057  | 0.277  | 2.2809 | 0.4221 |
| hsa-miR-6813-5p | 0.76   | 0      | 1.78   | 0.29   | 1.43   | 0.98   | 1.14   | 2.4    | 0.62   | 0.49   | 0      | 0      | 0      | 0      | 11.79  | 0.24   | 1.33   | 1.94   | 1.79   | 0.89   | 0.989  | 1.798  | 0.8624 | 0.4232 |
| hsa-miR-20a-3p  | 0.76   | 0.35   | 0      | 0.29   | 0      | 0      | 0      | 0      | 0      | 0      | 0      | 0      | 0      | 0      | 0      | 0      | 0.44   | 0.15   | 0      | 0      | 0.14   | 0.059  | -1.247 | 0.4235 |
| hsa-miR-22-5p   | 259.94 | 219.54 | 68.33  | 165.3  | 540.99 | 241.13 | 224.61 | 218.24 | 170.13 | 243.76 | 644.82 | 243.93 | 258.68 | 146.6  | 674.79 | 380.3  | 317.64 | 304.26 | 112.98 | 286.52 | 235.2  | 337.05 | 0.5191 | 0.4236 |
| hsa-miR-381-3p  | 62.69  | 101.81 | 16.64  | 27.84  | 1.43   | 41.57  | 55.66  | 11.19  | 96.24  | 18.18  | 92.96  | 73.18  | 66.91  | 19.26  | 20.63  | 66.83  | 57.07  | 98.08  | 77.11  | 115.26 | 43.325 | 68.729 | 0.6657 | 0.424  |
| hsa-miR-494-5p  | 0      | 0      | 0      | 0      | 0      | 0      | 0      | 0      | 0.62   | 0      | 5.93   | 0      | 0      | 0      | 0      | 0      | 0      | 0      | 0      | 1.19   | 0.062  | 0.712  | 3.5215 | 0.4247 |
| hsa-miR-4522    | 0      | 0      | 0      | 0      | 0      | 0      | 0.28   | 0      | 0      | 0      | 0      | 0.53   | 0      | 0      | 0      | 0.47   | 0      | 0.6    | 0      | 0      | 0.028  | 0.16   | 2.5146 | 0.4257 |
| hsa-miR-550a-5p | 91.75  | 38.78  | 68.92  | 77.77  | 193.72 | 126.19 | 123.81 | 111.92 | 90.03  | 159.23 | 348.12 | 119.84 | 97.98  | 152.19 | 196.45 | 125.67 | 91.13  | 128.73 | 79.98  | 268.35 | 108.21 | 160.84 | 0.5718 | 0.4265 |

|                  |       |        |       |       |      |       |       |       |       |      |       |       |       |       |       |       |       |       |       |       |        |        |        |        |
|------------------|-------|--------|-------|-------|------|-------|-------|-------|-------|------|-------|-------|-------|-------|-------|-------|-------|-------|-------|-------|--------|--------|--------|--------|
| hsa-miR-4797-5p  | 0     | 0      | 0.89  | 0.57  | 0    | 0     | 0.28  | 0     | 0     | 0.49 | 0     | 0     | 0     | 0     | 0     | 0     | 0     | 0.9   | 0     | 0     | 0.223  | 0.09   | -1.309 | 0.4272 |
| hsa-miR-6837-3p  | 2.68  | 1.04   | 2.38  | 1.72  | 7.17 | 0.98  | 1.14  | 0     | 0.62  | 1.47 | 3.96  | 1.59  | 1.79  | 1.86  | 0.98  | 0.94  | 0.88  | 2.99  | 0     | 0.3   | 1.92   | 1.529  | -0.329 | 0.4276 |
| hsa-miR-3115     | 0.76  | 0.69   | 0     | 0     | 0    | 0     | 1.14  | 0     | 0     | 0    | 0     | 0     | 0     | 0     | 0     | 0.24  | 0.88  | 0     | 0     | 0     | 0.259  | 0.112  | -1.21  | 0.4278 |
| hsa-miR-6840-5p  | 0.38  | 0      | 0     | 0     | 1.43 | 0     | 0     | 0     | 0     | 0    | 0     | 0     | 1.79  | 0     | 0     | 0     | 0.44  | 1.2   | 0     | 0     | 0.181  | 0.343  | 0.9222 | 0.4278 |
| hsa-miR-6851-5p  | 0     | 0      | 0     | 0     | 0    | 0     | 0.57  | 1.6   | 0.62  | 0    | 0     | 0.53  | 0     | 0     | 0     | 0.24  | 0     | 0     | 0     | 0     | 0.279  | 0.077  | -1.857 | 0.4282 |
| hsa-miR-4709-5p  | 1.53  | 0      | 0     | 0     | 0    | 0.49  | 0     | 0     | 0.62  | 0    | 0     | 0     | 0     | 0     | 0     | 0     | 0.44  | 0.45  | 0     | 0     | 0.264  | 0.089  | -1.569 | 0.4294 |
| hsa-miR-365b-3p  | 12.24 | 60.94  | 0     | 7.46  | 0    | 8.8   | 9.66  | 0     | 13.66 | 0    | 0     | 18.02 | 0     | 0     | 3.92  | 8.48  | 22.12 | 9.86  | 7.18  | 1.2   | 11.276 | 7.078  | -0.672 | 0.4295 |
| hsa-miR-365a-3p  | 12.24 | 60.94  | 0     | 7.46  | 0    | 8.8   | 9.66  | 0     | 13.66 | 0    | 0     | 18.02 | 0     | 0     | 3.92  | 8.48  | 22.12 | 9.86  | 7.18  | 1.2   | 11.276 | 7.078  | -0.672 | 0.4295 |
| hsa-miR-3173-3p  | 0     | 1.04   | 0     | 0.57  | 0    | 0     | 0.85  | 0     | 0     | 0    | 0     | 0     | 0     | 0     | 0     | 0.71  | 0     | 0     | 0     | 0.3   | 0.246  | 0.101  | -1.284 | 0.4308 |
| hsa-miR-2277-5p  | 1.91  | 2.08   | 1.78  | 2.01  | 7.17 | 1.47  | 1.99  | 4     | 1.86  | 0.98 | 9.89  | 6.36  | 0     | 0.62  | 3.93  | 2.82  | 1.77  | 2.54  | 0.72  | 13.4  | 2.525  | 4.205  | 0.7358 | 0.4329 |
| hsa-miR-3074-5p  | 7.65  | 2.08   | 29.11 | 3.44  | 2.87 | 5.38  | 6.82  | 23.58 | 6.83  | 7.37 | 27.69 | 9.55  | 14.34 | 21.12 | 15.72 | 10.59 | 6.19  | 21.68 | 3.95  | 21.44 | 9.513  | 15.227 | 0.6787 | 0.4348 |
| hsa-miR-548a-3p  | 0     | 1.73   | 0     | 1.15  | 0    | 1.47  | 0     | 0     | 1.24  | 0    | 0     | 0     | 1.19  | 0     | 0     | 0.94  | 0.44  | 0.45  | 0     | 0     | 0.559  | 0.302  | -0.888 | 0.4353 |
| hsa-miR-514a-3p  | 0     | 0      | 0     | 0     | 0    | 0.98  | 0.28  | 0     | 0     | 0.49 | 0     | 0     | 0.6   | 0     | 0     | 0.47  | 1.33  | 1.5   | 0     | 0     | 0.175  | 0.39   | 1.1561 | 0.4354 |
| hsa-miR-5196-3p  | 0.38  | 0      | 0     | 0.29  | 0    | 0     | 0.28  | 0     | 0     | 0    | 0     | 0     | 0     | 0     | 0     | 0     | 0     | 0.9   | 1.08  | 0     | 0.095  | 0.198  | 1.0595 | 0.4363 |
| hsa-miR-3667-5p  | 0     | 0      | 6.24  | 0.29  | 0    | 0     | 0.28  | 0.4   | 0     | 0.98 | 9.89  | 0.53  | 2.99  | 0     | 5.89  | 0.94  | 0.44  | 0.45  | 0     | 1.79  | 0.819  | 2.292  | 1.4847 | 0.4366 |
| hsa-miR-4436b-5p | 0.38  | 0      | 0     | 0     | 0    | 0     | 0     | 0     | 0     | 0    | 0     | 0     | 0     | 0     | 0     | 0     | 0     | 0     | 0     | 2.38  | 0.038  | 0.238  | 2.6469 | 0.4383 |
| hsa-miR-4532     | 0.38  | 0.69   | 3.27  | 0     | 8.61 | 0.49  | 1.14  | 0.8   | 0     | 0.49 | 1.98  | 0     | 0     | 3.11  | 0     | 0.24  | 0     | 0.75  | 0     | 3.57  | 1.587  | 0.965  | -0.718 | 0.4383 |
| hsa-miR-374b-5p  | 27.91 | 178.33 | 0.59  | 18.94 | 1.43 | 20.54 | 22.15 | 0     | 17.39 | 2.95 | 0     | 26.51 | 3.58  | 3.11  | 10.8  | 32.01 | 40.7  | 66.23 | 13.99 | 1.49  | 29.023 | 19.842 | -0.549 | 0.4383 |
| hsa-miR-766-3p   | 22.94 | 7.62   | 3.56  | 16.36 | 5.74 | 32.28 | 9.94  | 4     | 15.52 | 5.9  | 29.67 | 26.51 | 4.18  | 9.94  | 6.88  | 6.59  | 26.99 | 24.22 | 22.24 | 39.91 | 12.386 | 19.713 | 0.6704 | 0.4405 |
| hsa-miR-3678-3p  | 0     | 0      | 0     | 0     | 0    | 0.49  | 0     | 0     | 0     | 0    | 0     | 0     | 0     | 0     | 0     | 0.24  | 0.44  | 0.75  | 0     | 0     | 0.049  | 0.143  | 1.5452 | 0.4406 |

|                 |        |        |        |        |        |        |        |        |        |        |        |        |        |        |        |        |        |        |        |        |        |        |        |        |
|-----------------|--------|--------|--------|--------|--------|--------|--------|--------|--------|--------|--------|--------|--------|--------|--------|--------|--------|--------|--------|--------|--------|--------|--------|--------|
| hsa-miR-16-2-3p | 1595.6 | 1124.4 | 182.4  | 1847.1 | 12390  | 1543.1 | 2450.6 | 407.71 | 1797.5 | 1881.7 | 1701.1 | 1464.1 | 1396.8 | 411.23 | 3233.5 | 2071.9 | 2520.7 | 3113.1 | 1629.8 | 725.84 | 2522   | 1826.8 | -0.465 | 0.4413 |
| hsa-miR-4745-5p | 1.15   | 0.35   | 9.51   | 1.15   | 4.3    | 2.93   | 0.85   | 2.4    | 2.48   | 6.39   | 5.93   | 3.18   | 2.39   | 11.18  | 17.68  | 0.94   | 0.44   | 1.05   | 0.36   | 14     | 3.151  | 5.715  | 0.8589 | 0.4421 |
| hsa-miR-4646-3p | 0      | 0.35   | 0      | 2.01   | 1.43   | 0.49   | 0      | 0      | 0      | 0      | 0      | 0      | 0      | 0      | 0      | 0      | 0      | 0.15   | 1.08   | 0      | 0.428  | 0.123  | -1.799 | 0.4423 |
| hsa-miR-652-3p  | 323.78 | 408.96 | 427.78 | 308.51 | 782.06 | 204.44 | 365.74 | 1035.3 | 276.3  | 129.25 | 539.98 | 527.63 | 346.5  | 393.83 | 394.85 | 421.95 | 200.4  | 580.85 | 81.42  | 360.98 | 426.21 | 384.84 | -0.147 | 0.443  |
| hsa-miR-6871-5p | 0      | 0      | 0      | 0      | 0      | 0      | 0      | 0      | 0      | 0.49   | 0      | 0      | 0      | 0.62   | 0      | 0.47   | 0      | 0.6    | 0      | 0      | 0.049  | 0.169  | 1.7862 | 0.4444 |
| hsa-miR-1231    | 0      | 0      | 1.78   | 0      | 0      | 0      | 0      | 0      | 0      | 0      | 0      | 0      | 0      | 0      | 0      | 0.24   | 0      | 0      | 0      | 0      | 0.178  | 0.024  | -2.891 | 0.4447 |
| hsa-miR-142-3p  | 158.64 | 110.81 | 72.78  | 45.92  | 17.22  | 84.13  | 74.68  | 70.35  | 36.01  | 10.81  | 47.47  | 158.55 | 121.87 | 19.26  | 69.74  | 71.31  | 202.17 | 202.44 | 34.07  | 64.04  | 68.135 | 99.092 | 0.5404 | 0.4452 |
| hsa-miR-95-5p   | 0.38   | 0.35   | 0      | 0      | 0      | 0      | 0.28   | 0      | 0      | 0      | 0      | 0      | 0      | 0      | 0      | 0.47   | 0      | 0      | 0      | 2.38   | 0.101  | 0.285  | 1.4966 | 0.4452 |
| hsa-miR-660-5p  | 64.22  | 255.21 | 7.13   | 92.12  | 189.42 | 83.64  | 115.29 | 40.77  | 93.76  | 70.77  | 116.7  | 103.93 | 95.59  | 46.59  | 93.31  | 167.32 | 103.52 | 78.49  | 34.79  | 32.46  | 101.23 | 87.27  | -0.214 | 0.447  |
| hsa-miR-1303    | 9.17   | 12.12  | 0      | 17.79  | 33     | 2.93   | 13.06  | 2.4    | 8.07   | 11.3   | 0      | 10.08  | 8.36   | 8.08   | 0      | 12     | 2.21   | 21.23  | 7.17   | 6.55   | 10.984 | 7.568  | -0.537 | 0.4471 |
| hsa-miR-224-5p  | 105.51 | 41.21  | 4.46   | 38.17  | 14.35  | 258.73 | 63.89  | 9.59   | 31.05  | 85.02  | 71.21  | 36.59  | 39.43  | 3.73   | 32.41  | 36.24  | 176.07 | 24.37  | 62.05  | 65.23  | 65.198 | 54.733 | -0.252 | 0.4478 |
| hsa-miR-199b-5p | 8.41   | 56.1   | 3.56   | 9.76   | 10.04  | 11.74  | 9.94   | 8.79   | 9.93   | 1.97   | 21.76  | 18.03  | 6.57   | 24.23  | 107.06 | 13.88  | 9.29   | 10.32  | 1.79   | 5.36   | 13.024 | 21.829 | 0.7451 | 0.4478 |
| hsa-let-7i-3p   | 8.03   | 12.12  | 2.08   | 8.04   | 15.78  | 6.36   | 7.67   | 5.2    | 5.59   | 3.44   | 5.93   | 11.14  | 7.17   | 3.11   | 0      | 11.53  | 5.75   | 10.91  | 1.08   | 3.87   | 7.431  | 6.049  | -0.297 | 0.4482 |
| hsa-miR-29a-5p  | 0      | 0      | 0      | 0      | 0      | 0      | 0      | 2.4    | 0      | 0      | 0      | 0      | 0      | 0      | 0      | 0.24   | 0      | 0      | 0      | 0      | 0.24   | 0.024  | -3.322 | 0.4494 |
| hsa-miR-545-3p  | 0.38   | 0      | 0      | 0      | 0      | 0      | 0      | 0      | 0      | 0      | 0      | 0      | 0      | 0      | 0      | 0      | 0      | 0      | 1.43   | 0      | 0.038  | 0.143  | 1.9119 | 0.4502 |
| hsa-miR-6885-5p | 0      | 0      | 0      | 0      | 0      | 0.49   | 0      | 0      | 0      | 0      | 0      | 1.06   | 0      | 0      | 0      | 0      | 0.44   | 0.3    | 0      | 0      | 0.049  | 0.18   | 1.8771 | 0.4514 |
| hsa-miR-205-5p  | 6.12   | 31.51  | 9.21   | 19.23  | 1.43   | 16.14  | 7.67   | 26.78  | 14.9   | 3.93   | 0      | 18.56  | 10.16  | 21.12  | 89.38  | 16.24  | 11.94  | 27.66  | 4.66   | 22.34  | 13.692 | 22.206 | 0.6976 | 0.4514 |
| hsa-miR-548h-5p | 0      | 0      | 0      | 0      | 0      | 0.98   | 0      | 0      | 0      | 0      | 0      | 0      | 0      | 0      | 0      | 0.94   | 0.88   | 0.6    | 0      | 0      | 0.098  | 0.242  | 1.3042 | 0.4519 |
| hsa-miR-1248    | 0      | 0.35   | 0      | 0.29   | 0      | 0      | 0      | 0      | 0      | 0.98   | 0      | 0      | 0      | 0      | 0      | 0      | 0      | 0.3    | 0      | 0      | 0.162  | 0.03   | -2.433 | 0.4535 |
| hsa-miR-3138    | 1.91   | 1.39   | 0      | 1.15   | 0      | 1.96   | 1.42   | 1.6    | 0      | 1.97   | 5.93   | 1.06   | 0      | 0      | 0      | 1.41   | 1.77   | 1.5    | 0      | 0      | 1.14   | 1.167  | 0.0338 | 0.4546 |

|                   |        |        |        |        |        |        |        |        |        |        |        |        |        |        |        |        |        |        |        |        |        |        |        |        |
|-------------------|--------|--------|--------|--------|--------|--------|--------|--------|--------|--------|--------|--------|--------|--------|--------|--------|--------|--------|--------|--------|--------|--------|--------|--------|
| hsa-miR-6817-3p   | 0      | 0.69   | 2.08   | 0.29   | 0      | 0      | 0      | 0      | 0      | 0      | 0      | 0.53   | 1.19   | 0.62   | 1.96   | 1.41   | 0      | 0      | 0.72   | 0      | 0.306  | 0.643  | 1.0713 | 0.4546 |
| hsa-miR-597-3p    | 1.53   | 1.04   | 7.43   | 1.15   | 4.3    | 0.49   | 1.14   | 6.8    | 4.97   | 0.49   | 0      | 3.71   | 5.97   | 12.42  | 6.88   | 2.35   | 0      | 0.45   | 1.08   | 12.51  | 2.934  | 4.537  | 0.6289 | 0.456  |
| hsa-miR-4734      | 0.38   | 0.35   | 5.35   | 1.15   | 11.48  | 0.49   | 1.7    | 6.8    | 0.62   | 2.46   | 0      | 0      | 3.58   | 3.11   | 9.82   | 0.47   | 0      | 1.94   | 0.36   | 0      | 3.078  | 1.928  | -0.675 | 0.4564 |
| hsa-miR-4647      | 2.29   | 0.35   | 5.05   | 0.86   | 15.78  | 4.4    | 1.7    | 16.79  | 1.24   | 4.42   | 45.49  | 6.89   | 4.78   | 9.94   | 10.8   | 3.06   | 1.33   | 1.35   | 1.08   | 14     | 5.288  | 9.872  | 0.9006 | 0.4573 |
| hsa-miR-636       | 21.79  | 6.93   | 54.96  | 38.46  | 48.79  | 27.88  | 21.58  | 51.16  | 42.22  | 51.11  | 27.69  | 38.71  | 27.48  | 22.36  | 60.9   | 22.83  | 22.56  | 24.07  | 40.17  | 33.66  | 36.488 | 32.043 | -0.187 | 0.4578 |
| hsa-miR-30c-1-3p  | 5.73   | 1.04   | 9.51   | 2.01   | 0      | 4.89   | 1.42   | 2.4    | 0.62   | 4.91   | 9.89   | 7.42   | 2.99   | 3.73   | 5.89   | 2.35   | 5.75   | 10.76  | 3.95   | 0.89   | 3.253  | 5.362  | 0.721  | 0.4591 |
| hsa-miR-6783-3p   | 1.15   | 0.35   | 0      | 0.29   | 0      | 3.91   | 2.27   | 2.8    | 1.24   | 2.46   | 0      | 3.18   | 3.58   | 4.97   | 3.93   | 1.18   | 0.88   | 2.09   | 2.51   | 0      | 1.447  | 2.232  | 0.6253 | 0.4592 |
| hsa-miR-3164      | 2.68   | 0.35   | 5.05   | 2.3    | 1.43   | 3.42   | 3.98   | 7.99   | 6.21   | 4.42   | 0      | 1.59   | 4.78   | 3.11   | 9.82   | 2.59   | 3.98   | 1.35   | 1.43   | 3.28   | 3.783  | 3.193  | -0.245 | 0.4593 |
| hsa-miR-3187-5p   | 0.76   | 0.35   | 1.19   | 0      | 0      | 0      | 0.28   | 2.8    | 0.62   | 0.49   | 0      | 0.53   | 0.6    | 4.97   | 0      | 0      | 0.44   | 1.35   | 0      | 4.47   | 0.649  | 1.236  | 0.9294 | 0.4595 |
| hsa-miR-548a-5p   | 14.91  | 6.24   | 0      | 6.32   | 0      | 10.76  | 5.11   | 6      | 6.21   | 12.77  | 9.89   | 16.97  | 5.37   | 1.24   | 0      | 2.36   | 17.69  | 37.83  | 2.51   | 30.98  | 6.832  | 12.484 | 0.8697 | 0.4624 |
| hsa-miR-145-3p    | 57.72  | 57.48  | 3.86   | 40.18  | 21.52  | 91.46  | 31.24  | 6.4    | 36.01  | 31.45  | 104.83 | 58.86  | 34.65  | 18.64  | 29.47  | 59.07  | 134.04 | 75.06  | 36.58  | 42.29  | 37.732 | 59.349 | 0.6534 | 0.4624 |
| hsa-miR-146b-5p   | 1731.7 | 7557.6 | 240.92 | 897.12 | 563.95 | 1460.5 | 1235.2 | 513.63 | 840.71 | 819.24 | 1447.9 | 1483.7 | 1264.1 | 306.25 | 336.9  | 1631.8 | 2777.8 | 2475.6 | 604.35 | 1627.7 | 1586.1 | 1395.6 | -0.185 | 0.4629 |
| hsa-miR-765       | 0      | 0.35   | 0      | 0      | 0      | 0      | 0      | 0      | 0      | 0      | 0      | 0      | 0.6    | 1.24   | 0      | 0.24   | 0      | 0      | 0      | 0      | 0.035  | 0.208  | 2.5712 | 0.4637 |
| hsa-miR-7155-3p   | 0.38   | 0.35   | 2.38   | 0.57   | 0      | 0.98   | 0.28   | 0      | 0      | 0      | 0      | 0      | 0      | 0      | 2.95   | 0.47   | 0      | 0.15   | 0      | 0      | 0.494  | 0.357  | -0.469 | 0.4638 |
| hsa-miR-550a-3-5p | 132.27 | 66.48  | 88.23  | 118.52 | 278.38 | 160.43 | 181.17 | 163.88 | 131.63 | 213.78 | 486.58 | 158.02 | 133.23 | 201.88 | 266.19 | 178.38 | 138.47 | 198.7  | 111.9  | 361.28 | 153.48 | 223.46 | 0.542  | 0.4639 |
| hsa-miR-653-5p    | 1.15   | 0.69   | 0      | 0      | 0      | 1.47   | 0.57   | 0      | 0      | 0      | 0      | 0      | 0.6    | 0      | 0      | 0.94   | 0      | 0      | 0      | 0      | 0.388  | 0.154  | -1.333 | 0.4646 |
| hsa-miR-4513      | 0.76   | 0      | 0      | 0      | 0      | 0.98   | 0      | 0      | 0      | 0      | 0      | 0      | 0      | 0      | 0      | 0.24   | 0      | 0.3    | 0      | 0      | 0.174  | 0.054  | -1.688 | 0.4667 |
| hsa-miR-132-3p    | 18.73  | 36.01  | 3.86   | 10.04  | 7.17   | 15.65  | 16.47  | 2      | 10.56  | 4.42   | 11.87  | 14.32  | 7.17   | 0.62   | 6.88   | 14.12  | 16.81  | 22.43  | 8.97   | 2.98   | 12.491 | 10.617 | -0.235 | 0.4673 |
| hsa-miR-4668-5p   | 0.76   | 2.08   | 2.67   | 1.72   | 2.87   | 0.49   | 2.84   | 2.8    | 1.86   | 5.9    | 15.82  | 3.18   | 4.18   | 4.35   | 0.98   | 3.53   | 2.65   | 2.39   | 4.3    | 0      | 2.399  | 4.138  | 0.7865 | 0.4682 |
| hsa-miR-378j      | 0.38   | 0.69   | 10.1   | 0      | 0      | 0      | 0.57   | 6.8    | 0      | 0      | 5.93   | 0.53   | 0      | 1.86   | 2.95   | 0.71   | 0      | 1.35   | 0.36   | 2.38   | 1.854  | 1.607  | -0.206 | 0.4686 |

|                 |        |        |        |        |        |        |        |        |        |        |        |        |        |        |        |       |        |        |        |        |        |        |        |        |        |
|-----------------|--------|--------|--------|--------|--------|--------|--------|--------|--------|--------|--------|--------|--------|--------|--------|-------|--------|--------|--------|--------|--------|--------|--------|--------|--------|
| hsa-miR-6130    | 1.15   | 0      | 0      | 0.29   | 0      | 0.49   | 0.28   | 0      | 0.62   | 0      | 0      | 0.53   | 0      | 0      | 0      | 0.24  | 0.44   | 2.39   | 1.43   | 0      | 0.283  | 0.503  | 0.8298 | 0.4696 |        |
| hsa-miR-4446-3p | 42.05  | 9.7    | 14.26  | 22.39  | 68.88  | 32.77  | 22.72  | 26.78  | 29.18  | 53.08  | 122.63 | 30.76  | 14.34  | 38.51  | 96.26  | 8.24  | 22.56  | 47.1   | 47.34  | 59.87  | 32.181 | 48.761 | 0.5995 | 0.4701 |        |
| hsa-miR-4473    | 2.29   | 2.08   | 0      | 1.15   | 0      | 1.96   | 1.7    | 0      | 1.86   | 0      | 5.93   | 3.71   | 0.6    | 0      | 0      | 3.29  | 1.77   | 5.23   | 1.08   | 0      | 1.104  | 2.161  | 0.969  | 0.4703 |        |
| hsa-miR-6783-5p | 0.38   | 0.69   | 0      | 1.43   | 0      | 0.49   | 0.28   | 0      | 1.24   | 0.49   | 0      | 0      | 0      | 0      | 0      | 1.88  | 0.44   | 0.3    | 0      | 0      | 0.5    | 0.262  | -0.932 | 0.4717 |        |
| hsa-miR-1909-3p | 0      | 0      | 0      | 0      | 0      | 0      | 0      | 0.8    | 0      | 0      | 0      | 0      | 0      | 0      | 0      | 0     | 0      | 0      | 0      | 0      | 3.57   | 0.08   | 0.357  | 2.1579 | 0.4723 |
| hsa-miR-152-5p  | 0.76   | 0.35   | 0      | 0      | 0      | 0      | 0      | 0      | 0      | 0      | 0      | 1.59   | 0      | 0      | 0      | 0.71  | 0.44   | 0      | 0      | 0.6    | 0.111  | 0.334  | 1.5893 | 0.4732 |        |
| hsa-miR-4722-5p | 0      | 0      | 0      | 0      | 0      | 0.49   | 0.28   | 0      | 0      | 1.47   | 0      | 0.53   | 2.39   | 0      | 0      | 0.24  | 0.44   | 0      | 0      | 2.08   | 0.224  | 0.568  | 1.3424 | 0.4751 |        |
| hsa-miR-1277-3p | 1.53   | 1.73   | 0      | 0.57   | 0      | 0      | 0.28   | 0      | 1.24   | 0      | 0      | 2.12   | 1.19   | 0      | 0      | 1.65  | 3.1    | 0      | 1.08   | 0      | 0.535  | 0.914  | 0.7727 | 0.4765 |        |
| hsa-miR-7854-3p | 17.58  | 3.46   | 13.07  | 10.62  | 10.04  | 4.4    | 1.99   | 3.2    | 2.48   | 12.29  | 29.67  | 6.36   | 12.55  | 26.71  | 6.88   | 10.83 | 0.44   | 17.64  | 2.15   | 17.87  | 7.913  | 13.11  | 0.7284 | 0.4779 |        |
| hsa-miR-5004-3p | 0.76   | 0      | 1.49   | 0      | 0      | 0      | 0      | 0      | 1.24   | 0      | 0      | 0      | 0      | 0      | 0      | 0     | 1.33   | 0      | 0      | 0      | 0.349  | 0.133  | -1.392 | 0.4785 |        |
| hsa-miR-3177-3p | 26.76  | 6.93   | 15.45  | 18.65  | 22.96  | 23.97  | 18.46  | 17.19  | 15.52  | 23.59  | 61.32  | 25.98  | 11.95  | 28.57  | 36.34  | 11.3  | 16.81  | 21.83  | 23.31  | 43.19  | 18.948 | 28.06  | 0.5665 | 0.4786 |        |
| hsa-miR-4754    | 0.76   | 0      | 2.67   | 1.15   | 2.87   | 0.49   | 1.99   | 2.4    | 3.73   | 4.42   | 0      | 2.65   | 5.38   | 11.18  | 3.93   | 2.12  | 2.21   | 1.5    | 1.79   | 0      | 2.048  | 3.076  | 0.5868 | 0.4787 |        |
| hsa-miR-29b-3p  | 28.28  | 155.82 | 1.18   | 32.14  | 2.86   | 12.72  | 22.14  | 13.6   | 24.84  | 3.94   | 0      | 15.9   | 20.32  | 0      | 3.92   | 43.3  | 32.74  | 41.56  | 35.14  | 10.72  | 29.752 | 20.36  | -0.547 | 0.4793 |        |
| hsa-miR-331-3p  | 8.79   | 6.93   | 1.19   | 6.6    | 11.48  | 8.31   | 6.53   | 5.2    | 6.21   | 1.97   | 7.91   | 9.01   | 5.38   | 1.24   | 4.91   | 6.82  | 12.39  | 22.13  | 9.68   | 5.06   | 6.321  | 8.453  | 0.4193 | 0.4804 |        |
| hsa-miR-6868-3p | 1.15   | 0.35   | 0      | 0      | 0      | 1.96   | 0      | 0      | 0      | 1.47   | 7.91   | 0      | 0      | 0      | 0      | 1.65  | 0      | 3.59   | 1.08   | 0      | 0.493  | 1.423  | 1.5293 | 0.4805 |        |
| hsa-miR-6771-5p | 0      | 0      | 0      | 0      | 0      | 0      | 0      | 0      | 0.62   | 2.95   | 0      | 0      | 0      | 0      | 0      | 0     | 1.33   | 0      | 0      | 0      | 0.357  | 0.133  | -1.425 | 0.4806 |        |
| hsa-miR-18b-3p  | 1.15   | 1.39   | 0      | 1.15   | 1.43   | 0      | 0      | 2      | 0      | 0.49   | 1.98   | 2.12   | 0      | 0      | 0      | 1.65  | 0.44   | 1.35   | 1.79   | 3.28   | 0.761  | 1.261  | 0.7286 | 0.4823 |        |
| hsa-miR-155-5p  | 152.14 | 291.22 | 0      | 69.74  | 21.52  | 101.73 | 61.34  | 11.19  | 51.54  | 47.18  | 39.56  | 116.66 | 38.23  | 0.62   | 10.8   | 45.65 | 128.29 | 115.27 | 72.09  | 64.04  | 80.76  | 63.121 | -0.356 | 0.4825 |        |
| hsa-miR-1268a   | 3.06   | 3.46   | 69.52  | 4.3    | 22.95  | 5.38   | 2.28   | 19.99  | 4.96   | 5.9    | 45.5   | 3.18   | 7.16   | 65.84  | 8.84   | 5.88  | 1.76   | 16.3   | 1.43   | 93.23  | 14.18  | 24.912 | 0.813  | 0.4836 |        |
| hsa-miR-191-5p  | 6700.8 | 3003.6 | 4139.4 | 4327.2 | 4774.2 | 5533.7 | 4193.8 | 3581.9 | 4441.4 | 3957.6 | 10572  | 8061.8 | 6740.6 | 2601.5 | 4903.3 | 3350  | 9016.3 | 9006   | 4139.7 | 4492.9 | 4465.4 | 6288.4 | 0.4939 | 0.4837 |        |

|                 |        |        |        |        |        |        |        |        |        |        |        |        |        |        |        |        |        |        |        |        |        |        |        |        |        |
|-----------------|--------|--------|--------|--------|--------|--------|--------|--------|--------|--------|--------|--------|--------|--------|--------|--------|--------|--------|--------|--------|--------|--------|--------|--------|--------|
| hsa-miR-3605-3p | 6.88   | 4.16   | 0      | 9.76   | 2.87   | 9.29   | 8.8    | 0      | 4.35   | 7.86   | 5.93   | 4.77   | 1.79   | 0      | 1.96   | 4      | 6.64   | 7.92   | 32.64  | 10.13  | 5.397  | 7.578  | 0.4897 | 0.4839 |        |
| hsa-miR-27a-5p  | 52.75  | 34.63  | 97.14  | 16.65  | 71.75  | 46.95  | 34.93  | 93.13  | 40.36  | 17.2   | 539.98 | 66.28  | 35.84  | 37.27  | 26.52  | 25.89  | 34.51  | 93.15  | 21.16  | 100.37 | 50.549 | 98.097 | 0.9565 | 0.4849 |        |
| hsa-miR-4750-5p | 0.76   | 1.04   | 6.24   | 1.43   | 4.3    | 2.93   | 1.42   | 0.8    | 0.62   | 0.49   | 0      | 2.65   | 0.6    | 6.21   | 1.96   | 0.94   | 0.44   | 1.35   | 0.72   | 16.98  | 2.003  | 3.185  | 0.6691 | 0.4868 |        |
| hsa-miR-675-3p  | 0      | 2.08   | 0      | 1.43   | 0      | 0.98   | 0.85   | 0      | 0.62   | 0      | 0      | 0      | 0      | 0      | 0      | 0.47   | 0      | 0.45   | 1.79   | 0      | 0.596  | 0.271  | -1.137 | 0.4878 |        |
| hsa-miR-486-3p  | 1806.6 | 502.11 | 108.13 | 1571   | 1722   | 2285.1 | 1242.9 | 326.97 | 1127.6 | 1164.2 | 929.64 | 910.49 | 566.35 | 191.33 | 652.2  | 1004.4 | 1116.6 | 1152.3 | 1835.6 | 1511.8 | 1185.7 | 987.08 | -0.264 | 0.4904 |        |
| hsa-miR-494-3p  | 13     | 26.66  | 2.67   | 3.44   | 0      | 5.38   | 9.09   | 0.8    | 14.28  | 19.17  | 53.4   | 12.2   | 1.19   | 4.97   | 21.61  | 3.06   | 19.47  | 13.01  | 33.36  | 2.38   | 9.449  | 16.465 | 0.8012 | 0.4912 |        |
| hsa-miR-4654    | 0.76   | 0      | 0      | 0      | 0      | 0.98   | 0.85   | 1.6    | 1.86   | 0.98   | 0      | 0.53   | 0.6    | 3.11   | 2.95   | 0.24   | 0      | 0.45   | 0      | 5.66   | 0.703  | 1.354  | 0.9456 | 0.4923 |        |
| hsa-miR-3143    | 5.73   | 3.81   | 0      | 3.44   | 4.3    | 1.47   | 2.84   | 0      | 4.35   | 2.46   | 0      | 2.12   | 0.6    | 0      | 0      | 3.53   | 4.42   | 5.38   | 3.23   | 0      | 2.84   | 1.928  | -0.559 | 0.4945 |        |
| hsa-miR-5581-3p | 0.76   | 2.08   | 0      | 2.87   | 0      | 0.98   | 1.99   | 0      | 1.86   | 0.49   | 0      | 0      | 0      | 0      | 0      | 3.29   | 2.21   | 1.79   | 0.36   | 0      | 1.103  | 0.765  | -0.528 | 0.4946 |        |
| hsa-miR-93-3p   | 15.29  | 24.59  | 22.87  | 27.84  | 30.13  | 21.03  | 22.72  | 55.96  | 34.15  | 29.49  | 15.82  | 38.18  | 36.44  | 6.21   | 23.57  | 30.83  | 24.33  | 33.34  | 16.86  | 31.27  | 28.407 | 25.685 | -0.145 | 0.4952 |        |
| hsa-miR-6508-3p | 0      | 0      | 0      | 0.57   | 0      | 0      | 0      | 1.2    | 0      | 0      | 0      | 0      | 0      | 0      | 0      | 0.24   | 0      | 0      | 0      | 0      | 0.177  | 0.024  | -2.883 | 0.4963 |        |
| hsa-miR-16-5p   | 5166   | 10473  | 206.16 | 4882.2 | 1215.4 | 3493.2 | 5314.4 | 414.9  | 3401.3 | 1000.6 | 379.76 | 3308.9 | 2113.7 | 156.54 | 935.08 | 6593.1 | 6832.3 | 3952.1 | 2705.4 | 479.52 | 3556.7 | 2745.6 | -0.373 | 0.497  |        |
| hsa-miR-29c-3p  | 18.73  | 52.29  | 0      | 14.92  | 4.3    | 9.78   | 9.37   | 8.39   | 12.42  | 1.47   | 0      | 12.73  | 11.95  | 0      | 0      | 22.59  | 14.16  | 16.89  | 10.76  | 2.68   | 13.167 | 9.176  | -0.521 | 0.4987 |        |
| hsa-miR-3190-3p | 3.44   | 1.39   | 20.5   | 2.58   | 5.74   | 1.47   | 1.7    | 3.6    | 2.48   | 3.44   | 39.56  | 2.12   | 6.57   | 21.12  | 7.86   | 3.06   | 3.54   | 3.14   | 0      | 4.47   | 4.634  | 9.144  | 0.9806 | 0.4988 |        |
| hsa-miR-3196    | 0      | 0.35   | 1.78   | 1.72   | 4.3    | 0.49   | 0.85   | 5.6    | 0.62   | 0.98   | 1.98   | 0.53   | 0.6    | 8.7    | 3.93   | 2.82   | 0      | 1.05   | 0.72   | 4.77   | 1.669  | 2.51   | 0.5887 | 0.4994 |        |
| hsa-miR-616-5p  | 0.76   | 1.73   | 0      | 0      | 2.87   | 2.45   | 0.57   | 0      | 0      | 0      | 0      | 0.53   | 1.79   | 0      | 0      | 0.47   | 1.33   | 0.6    | 0      | 0      | 0.838  | 0.472  | -0.828 | 0.5003 |        |
| hsa-miR-18b-5p  | 1.53   | 1.39   | 0      | 1.72   | 0      | 0      | 1.7    | 0.8    | 2.48   | 0      | 0      | 1.06   | 2.99   | 0      | 0      | 4.24   | 0      | 3.89   | 2.87   | 0      | 0.962  | 1.505  | 0.6457 | 0.5012 |        |
| hsa-miR-4749-5p | 0      | 0      | 0      | 0.29   | 0      | 0.98   | 0.28   | 0      | 0      | 0      | 0      | 0      | 0      | 0      | 0      | 0.24   | 0      | 0      | 0.36   | 3.87   | 0.155  | 0.447  | 1.528  | 0.5028 |        |
| hsa-miR-548j-5p | 13.38  | 5.89   | 0      | 6.03   | 0      | 10.27  | 5.11   | 5.6    | 5.59   | 11.79  | 9.89   | 14.32  | 4.18   | 1.24   | 0      | 2.12   | 16.81  | 33.34  | 2.51   | 28     | 6.366  | 11.241 | 0.8203 | 0.5032 |        |
| hsa-miR-4787-5p | 0.38   | 0      | 0.89   | 0      | 0      | 0      | 0      | 1.2    | 0      | 0      | 0      | 0      | 0      | 0      | 0      | 0      | 0      | 0      | 0.6    | 0      | 6.25   | 0.247  | 0.685  | 1.4716 | 0.5048 |

|                  |        |        |       |        |        |        |        |       |        |        |        |        |       |       |        |       |        |        |       |        |        |        |        |        |        |
|------------------|--------|--------|-------|--------|--------|--------|--------|-------|--------|--------|--------|--------|-------|-------|--------|-------|--------|--------|-------|--------|--------|--------|--------|--------|--------|
| hsa-miR-92a-1-5p | 4.2    | 4.85   | 21.98 | 3.73   | 12.91  | 7.83   | 5.11   | 7.59  | 1.86   | 7.86   | 41.54  | 3.71   | 4.78  | 3.73  | 33.4   | 4.71  | 4.87   | 7.03   | 5.02  | 24.72  | 7.792  | 13.351 | 0.7769 | 0.5076 |        |
| hsa-miR-3613-3p  | 1.15   | 3.12   | 5.64  | 4.88   | 0      | 2.93   | 1.7    | 6     | 9.31   | 0.49   | 1.98   | 0.53   | 4.18  | 4.35  | 2.95   | 3.29  | 4.42   | 2.69   | 2.87  | 3.28   | 3.522  | 3.054  | -0.206 | 0.5081 |        |
| hsa-miR-378a-5p  | 9.94   | 15.93  | 15.45 | 12.34  | 18.65  | 10.27  | 13.35  | 33.98 | 16.14  | 11.3   | 21.76  | 16.97  | 14.34 | 10.56 | 12.77  | 22.12 | 10.17  | 19.59  | 7.89  | 13.11  | 15.735 | 14.928 | -0.076 | 0.5085 |        |
| hsa-miR-15b-5p   | 175.46 | 263.17 | 29.41 | 146.65 | 665.83 | 89.02  | 139.99 | 61.16 | 126.67 | 51.6   | 367.9  | 112.95 | 57.35 | 18.64 | 119.83 | 200.5 | 124.75 | 396.95 | 83.93 | 58.67  | 174.9  | 154.15 | -0.182 | 0.5096 |        |
| hsa-miR-1255a    | 3.82   | 2.42   | 0.3   | 0      | 0      | 0.49   | 0.85   | 0     | 0      | 1.97   | 0      | 2.12   | 0     | 0     | 0      | 2.35  | 0.44   | 4.49   | 3.59  | 1.49   | 0.985  | 1.448  | 0.5559 | 0.5099 |        |
| hsa-miR-6511b-5p | 5.36   | 3.46   | 34.46 | 9.76   | 28.7   | 17.6   | 13.06  | 19.18 | 9.94   | 15.72  | 19.78  | 11.66  | 27.48 | 31.06 | 11.78  | 9.42  | 7.96   | 5.08   | 3.58  | 13.1   | 15.724 | 14.09  | -0.158 | 0.51   |        |
| hsa-miR-1268b    | 1.53   | 1.73   | 40.7  | 2.58   | 12.91  | 2.93   | 1.14   | 13.59 | 2.48   | 3.93   | 23.74  | 1.59   | 3.58  | 39.76 | 6.88   | 3.29  | 0.88   | 9.87   | 1.43  | 51.53  | 8.352  | 14.255 | 0.7713 | 0.5104 |        |
| hsa-miR-6820-3p  | 0      | 0      | 0     | 1.15   | 1.43   | 0      | 0      | 0     | 0.62   | 0      | 0      | 0      | 0.6   | 0     | 0      | 0     | 0      | 0.15   | 0.36  | 0      | 0.32   | 0.111  | -1.528 | 0.5104 |        |
| hsa-miR-150-3p   | 122.33 | 146.13 | 45.45 | 86.67  | 166.46 | 114.45 | 90.58  | 66.35 | 66.44  | 124.83 | 288.78 | 72.65  | 68.7  | 42.24 | 66.79  | 81.19 | 63.26  | 119.01 | 57.39 | 245.42 | 102.97 | 110.54 | 0.1024 | 0.5109 |        |
| hsa-miR-6824-3p  | 0      | 0      | 0     | 0      | 0      | 0      | 0.85   | 0     | 0.62   | 0      | 0      | 0      | 0     | 0.62  | 0      | 0     | 0      | 0      | 0     | 0      | 0      | 0.147  | 0.062  | -1.246 | 0.5124 |
| hsa-miR-1304-3p  | 18.73  | 3.12   | 1.78  | 5.17   | 7.17   | 10.27  | 7.38   | 6.4   | 16.76  | 10.81  | 17.8   | 10.08  | 5.38  | 1.24  | 7.86   | 6.35  | 11.94  | 13.31  | 4.66  | 8.64   | 8.759  | 8.726  | -0.005 | 0.5124 |        |
| hsa-miR-3127-3p  | 5.35   | 1.73   | 0.89  | 4.02   | 0      | 1.96   | 7.1    | 0     | 0      | 2.95   | 5.93   | 4.77   | 3.58  | 6.21  | 0      | 2.59  | 5.75   | 4.93   | 3.95  | 1.19   | 2.4    | 3.89   | 0.6967 | 0.513  |        |
| hsa-miR-552-5p   | 0.38   | 0      | 0     | 0.29   | 0      | 0      | 0      | 0     | 0      | 0      | 0      | 0      | 0     | 0     | 0      | 0     | 0      | 0.15   | 0     | 0      | 0.067  | 0.015  | -2.159 | 0.5131 |        |
| hsa-miR-6769b-2  | 0.76   | 0      | 0     | 0      | 0      | 0      | 0      | 0     | 0      | 0.98   | 0      | 0      | 0     | 0     | 0      | 0     | 0      | 0      | 0.36  | 0      | 0.174  | 0.036  | -2.273 | 0.5131 |        |
| hsa-miR-548h-3p  | 1.52   | 4.16   | 0     | 1.72   | 0      | 0      | 1.7    | 0     | 2.48   | 0      | 0      | 6.36   | 2.38  | 0     | 0      | 2.36  | 5.3    | 3      | 0.72  | 0      | 1.158  | 2.012  | 0.797  | 0.5142 |        |
| hsa-miR-548z     | 1.52   | 4.16   | 0     | 1.72   | 0      | 0      | 1.7    | 0     | 2.48   | 0      | 0      | 6.36   | 2.38  | 0     | 0      | 2.36  | 5.3    | 3      | 0.72  | 0      | 1.158  | 2.012  | 0.797  | 0.5143 |        |
| hsa-miR-548g-3p  | 0      | 1.39   | 0     | 0.29   | 0      | 0.49   | 2.27   | 0     | 1.24   | 0.49   | 0      | 1.59   | 0     | 0.62  | 0.98   | 0.24  | 0.88   | 0.15   | 0.36  | 0      | 0.617  | 0.482  | -0.356 | 0.5148 |        |
| hsa-miR-7110-5p  | 0      | 0      | 4.16  | 0      | 2.87   | 0      | 0      | 0     | 0      | 0      | 0      | 0      | 1.79  | 0     | 0.98   | 0     | 0      | 0      | 0     | 0      | 0.703  | 0.277  | -1.344 | 0.5158 |        |
| hsa-miR-383-5p   | 1.53   | 0      | 0     | 0      | 0      | 0      | 0      | 0     | 0      | 0      | 3.96   | 1.06   | 0     | 0     | 0      | 0.24  | 0.44   | 0.3    | 0     | 0      | 0.153  | 0.6    | 1.9714 | 0.5158 |        |
| hsa-miR-3150a-5p | 0.38   | 0      | 0     | 1.43   | 1.43   | 0.98   | 1.14   | 0     | 1.24   | 0.49   | 0      | 1.59   | 1.79  | 0     | 0.98   | 1.41  | 1.77   | 0.3    | 2.15  | 0.3    | 0.709  | 1.029  | 0.5374 | 0.5168 |        |

|                 |        |        |        |        |        |        |        |        |        |        |        |        |        |        |        |        |        |        |        |        |        |        |        |        |
|-----------------|--------|--------|--------|--------|--------|--------|--------|--------|--------|--------|--------|--------|--------|--------|--------|--------|--------|--------|--------|--------|--------|--------|--------|--------|
| hsa-miR-6787-5p | 0      | 0      | 0      | 0      | 0      | 0.49   | 0      | 0      | 0      | 0      | 0      | 0      | 0      | 0      | 0      | 0      | 0.44   | 0      | 1.08   | 0      | 0.049  | 0.152  | 1.6332 | 0.5176 |
| hsa-miR-487a-5p | 3.06   | 0.35   | 0      | 0.29   | 0      | 0      | 0.85   | 0      | 2.48   | 2.46   | 11.87  | 2.65   | 0      | 0      | 2.95   | 0.47   | 0.88   | 1.5    | 1.08   | 1.79   | 0.949  | 2.319  | 1.289  | 0.52   |
| hsa-miR-26b-3p  | 9.17   | 12.12  | 0      | 5.74   | 5.74   | 8.31   | 7.95   | 7.99   | 3.1    | 7.86   | 0      | 9.55   | 2.99   | 1.24   | 0      | 6.35   | 15.48  | 14.8   | 2.51   | 0      | 6.798  | 5.292  | -0.361 | 0.5202 |
| hsa-miR-181a-3p | 19.11  | 23.2   | 65.65  | 9.18   | 5.74   | 12.23  | 14.2   | 21.98  | 9.93   | 5.9    | 7.91   | 27.04  | 18.52  | 7.45   | 2.95   | 25.42  | 20.79  | 31.1   | 2.87   | 21.44  | 18.712 | 16.549 | -0.177 | 0.5202 |
| hsa-miR-6780b-2 | 0.38   | 0      | 0      | 0      | 0      | 0      | 0      | 1.6    | 0      | 0      | 0      | 0      | 0      | 0      | 0      | 0      | 0      | 0      | 0.36   | 0      | 0.198  | 0.036  | -2.459 | 0.5204 |
| hsa-miR-1260a   | 38.61  | 17.66  | 19.31  | 28.41  | 60.27  | 38.15  | 14.48  | 18.39  | 29.18  | 14.25  | 29.67  | 31.29  | 5.97   | 21.74  | 37.32  | 22.83  | 21.68  | 58.76  | 25.11  | 133.73 | 27.871 | 38.81  | 0.4777 | 0.5237 |
| hsa-miR-4700-5p | 0      | 0      | 0      | 0      | 0      | 0      | 0      | 0.8    | 0      | 1.47   | 0      | 1.06   | 0      | 0      | 0      | 0      | 0      | 0      | 0      | 0      | 0.227  | 0.106  | -1.099 | 0.5247 |
| hsa-miR-361-3p  | 693.82 | 1709.2 | 415.6  | 654.62 | 1340.3 | 744.9  | 926    | 866.98 | 1043.1 | 790.24 | 2039.3 | 1183.1 | 1073   | 616.84 | 802.48 | 924.86 | 912.21 | 762.06 | 302.71 | 884.29 | 918.48 | 950.07 | 0.0488 | 0.5253 |
| hsa-miR-365a-5p | 0.76   | 0.69   | 3.27   | 0.29   | 0      | 1.96   | 1.42   | 4      | 1.24   | 0.98   | 15.82  | 4.24   | 0.6    | 4.97   | 0      | 1.18   | 1.33   | 1.94   | 0      | 2.08   | 1.461  | 3.216  | 1.1383 | 0.5256 |
| hsa-miR-141-3p  | 7.26   | 5.54   | 0      | 3.73   | 0      | 10.27  | 4.26   | 2.4    | 1.86   | 0      | 0      | 5.83   | 1.79   | 0      | 1.96   | 6.35   | 3.1    | 5.38   | 0.72   | 2.68   | 3.532  | 2.781  | -0.345 | 0.528  |
| hsa-miR-6739-3p | 0.38   | 0      | 0      | 0.29   | 0      | 0      | 0.28   | 0      | 0      | 0.98   | 0      | 0      | 0      | 0      | 0      | 0.24   | 0      | 0.6    | 0      | 0      | 0.193  | 0.084  | -1.2   | 0.5289 |
| hsa-miR-337-3p  | 0.76   | 2.42   | 0      | 0.29   | 0      | 0.49   | 0.85   | 0      | 1.24   | 0      | 9.89   | 1.06   | 0      | 0      | 0      | 1.41   | 0.88   | 1.35   | 1.43   | 0      | 0.605  | 1.602  | 1.4049 | 0.5289 |
| hsa-miR-4676-5p | 0.38   | 0      | 5.05   | 0.86   | 1.43   | 0      | 0.85   | 1.2    | 0      | 0.98   | 0      | 0      | 0      | 0      | 1.96   | 0.24   | 0.88   | 1.94   | 0      | 3.28   | 1.075  | 0.83   | -0.373 | 0.5302 |
| hsa-miR-5010-5p | 8.79   | 5.89   | 11.59  | 16.07  | 17.22  | 12.72  | 6.82   | 18.39  | 21.11  | 19.17  | 1.98   | 11.14  | 19.12  | 1.24   | 16.7   | 7.53   | 11.06  | 5.38   | 22.95  | 11.91  | 13.777 | 10.901 | -0.338 | 0.5302 |
| hsa-miR-576-3p  | 147.17 | 108.04 | 1292.9 | 106.76 | 611.3  | 107.6  | 141.7  | 633.95 | 121.7  | 278.16 | 1190.7 | 257.72 | 857.89 | 1127.5 | 668.9  | 252.98 | 221.19 | 150.71 | 126.61 | 320.48 | 354.92 | 517.47 | 0.544  | 0.5307 |
| hsa-miR-183-3p  | 2.29   | 3.46   | 0      | 2.01   | 5.74   | 3.42   | 1.14   | 1.2    | 1.86   | 0      | 0      | 2.12   | 0.6    | 1.86   | 1.96   | 1.88   | 0.88   | 2.54   | 2.51   | 0      | 2.112  | 1.435  | -0.558 | 0.5312 |
| hsa-miR-425-5p  | 1578.4 | 1220   | 1220.7 | 1658.8 | 1587.1 | 1382.2 | 1769.9 | 2708.5 | 1538   | 1344.1 | 1147.2 | 2362.4 | 1500.1 | 1201.4 | 1809.3 | 1735.1 | 1520.1 | 1882.2 | 781.88 | 1348.3 | 1600.8 | 1528.8 | -0.066 | 0.5322 |
| hsa-miR-6816-3p | 0      | 0.35   | 1.78   | 0.57   | 0      | 0      | 0      | 0      | 0      | 0      | 0      | 0      | 0.6    | 0      | 0      | 0.71   | 0      | 0      | 0      | 0      | 0.27   | 0.131  | -1.043 | 0.5331 |
| hsa-miR-377-5p  | 1.15   | 1.39   | 15.15  | 0.29   | 0      | 0.98   | 0.57   | 2      | 4.97   | 0.49   | 7.91   | 2.12   | 2.99   | 11.8   | 9.82   | 0.47   | 1.77   | 0.9    | 2.15   | 7.45   | 2.699  | 4.738  | 0.8119 | 0.5338 |
| hsa-miR-520f-3p | 0      | 0      | 0      | 1.15   | 1.43   | 0      | 0      | 0      | 0      | 0      | 0      | 1.06   | 0      | 0      | 0      | 0      | 0      | 0      | 0      | 0      | 0.258  | 0.106  | -1.283 | 0.5347 |

|                  |        |        |        |        |        |        |        |        |        |        |        |        |        |        |        |        |        |        |        |        |        |        |        |        |
|------------------|--------|--------|--------|--------|--------|--------|--------|--------|--------|--------|--------|--------|--------|--------|--------|--------|--------|--------|--------|--------|--------|--------|--------|--------|
| hsa-miR-26a-2-3p | 0.76   | 4.85   | 0      | 0      | 0      | 0      | 0      | 0      | 0      | 0      | 0      | 0      | 0      | 0      | 0      | 1.18   | 0      | 1.35   | 0      | 0      | 0.561  | 0.253  | -1.149 | 0.5347 |
| hsa-miR-941      | 219.04 | 247.24 | 330.64 | 168.46 | 367.35 | 204.44 | 263.52 | 731.08 | 567.51 | 280.61 | 371.86 | 649.06 | 258.68 | 244.75 | 230.82 | 136.02 | 141.56 | 215.6  | 169.65 | 897.69 | 337.99 | 331.57 | -0.028 | 0.5363 |
| hsa-miR-1254     | 13     | 2.42   | 49.91  | 9.76   | 25.83  | 11.74  | 11.93  | 15.19  | 7.45   | 11.3   | 35.6   | 10.08  | 44.81  | 29.82  | 19.64  | 7.77   | 19.47  | 9.72   | 12.19  | 30.68  | 15.853 | 21.978 | 0.4713 | 0.5364 |
| hsa-miR-323b-3p  | 8.41   | 16.28  | 0      | 9.18   | 0      | 1.96   | 5.68   | 0      | 6.83   | 14.74  | 25.71  | 4.77   | 1.79   | 0      | 0      | 3.77   | 8.41   | 21.68  | 31.2   | 9.23   | 6.308  | 10.656 | 0.7564 | 0.5367 |
| hsa-miR-130b-3p  | 44.73  | 27.01  | 68.92  | 22.96  | 17.22  | 27.88  | 35.78  | 38.77  | 14.28  | 14.74  | 45.49  | 36.59  | 28.68  | 13.67  | 10.8   | 44.01  | 29.2   | 41.12  | 26.18  | 15.19  | 31.229 | 29.093 | -0.102 | 0.5379 |
| hsa-miR-6511a-5- | 2.3    | 0      | 11.28  | 0.58   | 11.48  | 3.92   | 1.7    | 2.4    | 0      | 5.9    | 7.92   | 5.3    | 4.78   | 6.22   | 0      | 0.94   | 0.88   | 0.6    | 0.72   | 5.96   | 3.956  | 3.332  | -0.248 | 0.538  |
| hsa-miR-1249-3p  | 2.29   | 2.42   | 0.59   | 2.87   | 7.17   | 4.89   | 1.42   | 4.4    | 1.86   | 0      | 0      | 4.77   | 0.6    | 0      | 0.98   | 0.71   | 3.1    | 2.39   | 2.87   | 4.77   | 2.791  | 2.019  | -0.467 | 0.5383 |
| hsa-miR-7847-3p  | 0      | 0      | 0.89   | 0      | 0      | 0      | 0      | 1.2    | 0      | 0      | 0      | 0.53   | 0      | 1.24   | 0      | 0      | 0      | 0.45   | 0      | 2.98   | 0.209  | 0.52   | 1.315  | 0.5386 |
| hsa-miR-29c-5p   | 6.5    | 15.58  | 6.24   | 6.89   | 1.43   | 4.89   | 6.25   | 33.98  | 4.35   | 0.98   | 5.93   | 9.55   | 10.16  | 0.62   | 7.86   | 13.65  | 7.08   | 13.76  | 2.15   | 3.87   | 8.709  | 7.463  | -0.223 | 0.5386 |
| hsa-miR-3120-5p  | 2.68   | 0.35   | 1.78   | 2.87   | 1.43   | 3.42   | 1.99   | 0      | 0.62   | 1.97   | 13.85  | 3.18   | 0.6    | 0      | 0      | 0.71   | 3.1    | 4.63   | 0.72   | 9.53   | 1.711  | 3.632  | 1.0859 | 0.5392 |
| hsa-miR-7848-3p  | 0.38   | 0      | 0      | 0.29   | 0      | 0      | 0      | 0      | 0      | 0      | 0      | 0      | 0      | 0      | 0      | 0.71   | 0      | 0.9    | 0.36   | 0      | 0.067  | 0.197  | 1.556  | 0.5396 |
| hsa-miR-4658     | 0      | 0      | 1.49   | 0      | 1.43   | 0.98   | 0.28   | 0.8    | 0      | 0.98   | 5.93   | 2.65   | 0      | 1.86   | 1.96   | 0.47   | 0      | 0      | 0.36   | 0      | 0.596  | 1.323  | 1.1504 | 0.5399 |
| hsa-miR-3154     | 0.76   | 0.69   | 0      | 0      | 0      | 0.49   | 0      | 0      | 0      | 0      | 0      | 0      | 0      | 0      | 0      | 0      | 0      | 0.45   | 0.36   | 0      | 0.194  | 0.081  | -1.26  | 0.5407 |
| hsa-miR-3619-3p  | 1.15   | 1.04   | 0      | 1.72   | 0      | 0.98   | 1.14   | 1.6    | 1.24   | 0      | 0      | 0      | 0      | 0      | 1.96   | 0.94   | 0.88   | 1.64   | 2.15   | 7.15   | 0.887  | 1.472  | 0.7308 | 0.5412 |
| hsa-miR-4797-3p  | 0.76   | 1.39   | 2.97   | 0.57   | 0      | 0.85   | 1.2    | 0      | 0.49   | 0      | 1.59   | 0.6    | 0      | 0      | 1.88   | 0      | 1.35   | 0      | 0      | 0.823  | 0.542  | -0.603 | 0.5418 |        |
| hsa-miR-3064-5p  | 1.91   | 0.69   | 6.54   | 2.01   | 7.17   | 2.93   | 3.41   | 5.6    | 2.48   | 4.42   | 13.85  | 3.71   | 1.19   | 3.11   | 5.89   | 1.41   | 0.88   | 2.99   | 1.08   | 6.55   | 3.716  | 4.066  | 0.1299 | 0.5446 |
| hsa-miR-1285-3p  | 133.8  | 83.45  | 382.62 | 109.06 | 820.8  | 162.38 | 125.52 | 155.88 | 132.88 | 239.82 | 961.29 | 141.06 | 209.1  | 403.77 | 708.19 | 192.27 | 111.04 | 205.43 | 126.24 | 281.76 | 234.62 | 334.02 | 0.5096 | 0.5458 |
| hsa-miR-664a-5p  | 135.71 | 71.33  | 57.93  | 84.66  | 91.84  | 125.7  | 117.56 | 45.17  | 67.06  | 179.38 | 150.33 | 137.87 | 81.85  | 77.65  | 90.36  | 76.95  | 119.45 | 97.48  | 70.3   | 85.78  | 97.634 | 98.802 | 0.0172 | 0.5462 |
| hsa-miR-1301-3p  | 256.5  | 57.14  | 76.05  | 112.21 | 226.73 | 220.58 | 150.78 | 83.14  | 111.14 | 219.67 | 346.14 | 262.49 | 155.33 | 104.36 | 176.8  | 71.54  | 276.05 | 176.42 | 195.83 | 307.07 | 151.39 | 207.2  | 0.4527 | 0.5464 |
| hsa-miR-4662a-5- | 1.53   | 0.69   | 0      | 0.29   | 2.87   | 0      | 0.28   | 0      | 0      | 0      | 0      | 0      | 0      | 0      | 0      | 0.24   | 1.33   | 3.29   | 1.79   | 0      | 0.566  | 0.665  | 0.2326 | 0.5468 |

|                  |        |        |        |        |        |        |        |        |        |        |        |        |        |        |        |        |        |        |        |        |        |        |        |        |
|------------------|--------|--------|--------|--------|--------|--------|--------|--------|--------|--------|--------|--------|--------|--------|--------|--------|--------|--------|--------|--------|--------|--------|--------|--------|
| hsa-miR-1250-5p  | 8.03   | 2.77   | 8.62   | 3.73   | 31.57  | 3.42   | 3.69   | 8.39   | 2.48   | 0.49   | 57.36  | 6.36   | 2.39   | 2.48   | 4.91   | 4.24   | 5.75   | 14.35  | 0      | 30.08  | 7.319  | 12.792 | 0.8055 | 0.5482 |
| hsa-miR-6781-5p  | 0.38   | 1.04   | 1.19   | 0.86   | 8.61   | 1.96   | 1.14   | 2.4    | 1.24   | 2.46   | 5.93   | 2.65   | 1.19   | 0      | 2.95   | 1.88   | 0.44   | 1.64   | 1.08   | 0      | 2.128  | 1.776  | -0.261 | 0.5488 |
| hsa-miR-378c     | 139.15 | 100.08 | 3789.7 | 99.3   | 1308.7 | 115.43 | 133.75 | 2214.4 | 83.82  | 210.83 | 2276.6 | 266.73 | 601    | 1747.4 | 961.6  | 275.81 | 126.97 | 433.44 | 53.08  | 917.95 | 819.52 | 766.06 | -0.097 | 0.5491 |
| hsa-miR-548ar-3p | 5.35   | 0.69   | 0      | 0      | 0      | 0      | 0.28   | 0      | 0      | 0      | 0      | 3.71   | 0      | 0      | 0      | 4.24   | 2.65   | 0.3    | 0      | 0      | 0.632  | 1.09   | 0.7863 | 0.5496 |
| hsa-miR-6873-3p  | 2.29   | 0      | 0      | 1.15   | 1.43   | 1.96   | 0.85   | 0      | 0      | 0      | 0      | 0      | 1.19   | 0      | 0      | 0      | 0.88   | 1.5    | 5.74   | 0      | 0.768  | 0.931  | 0.2777 | 0.5511 |
| hsa-miR-5096     | 3.82   | 2.42   | 1.78   | 3.73   | 8.61   | 5.38   | 5.4    | 0      | 4.35   | 0.98   | 31.65  | 2.12   | 1.19   | 7.45   | 3.93   | 2.12   | 4.87   | 5.53   | 1.08   | 8.34   | 3.647  | 6.828  | 0.9048 | 0.553  |
| hsa-miR-4732-3p  | 94.04  | 12.12  | 57.93  | 97     | 113.36 | 126.19 | 92     | 58.76  | 109.9  | 196.58 | 49.45  | 77.42  | 75.87  | 50.32  | 110.99 | 58.36  | 97.33  | 116.92 | 346.83 | 195.38 | 95.788 | 117.89 | 0.2995 | 0.5542 |
| hsa-miR-484      | 1583.8 | 1059.3 | 137.84 | 1936.3 | 367.35 | 1350.4 | 1180.7 | 408.11 | 1333.7 | 833.49 | 102.85 | 1186.2 | 411.02 | 71.44  | 226.89 | 1152.4 | 1223.2 | 1827.6 | 1635.5 | 577.22 | 1019.1 | 841.44 | -0.276 | 0.5556 |
| hsa-miR-219b-5p  | 0.38   | 0.35   | 0      | 0.57   | 0      | 0      | 0.57   | 0      | 0.62   | 0.49   | 0      | 2.12   | 2.39   | 0      | 0      | 0.47   | 0.88   | 0.3    | 0      | 0      | 0.298  | 0.616  | 1.0476 | 0.5557 |
| hsa-miR-3944-5p  | 0.38   | 0.69   | 0      | 0.57   | 0      | 1.47   | 1.14   | 0      | 0      | 3.44   | 0      | 0.53   | 2.39   | 0      | 0.98   | 0.24   | 1.77   | 0.9    | 2.15   | 3.87   | 0.769  | 1.283  | 0.7385 | 0.5563 |
| hsa-miR-3179     | 4.2    | 3.12   | 0      | 1.43   | 0      | 2.93   | 1.14   | 0.8    | 3.73   | 0      | 0      | 6.36   | 4.78   | 0      | 0      | 2.82   | 3.98   | 2.24   | 1.08   | 5.36   | 1.735  | 2.662  | 0.6176 | 0.5566 |
| hsa-miR-4706     | 0      | 0      | 1.19   | 0      | 0      | 0.49   | 0      | 0      | 0      | 0      | 0      | 0      | 2.39   | 0      | 0      | 0      | 0      | 0      | 0      | 1.79   | 0.168  | 0.418  | 1.315  | 0.5566 |
| hsa-miR-766-5p   | 13     | 10.39  | 9.8    | 8.61   | 17.22  | 17.12  | 11.93  | 24.78  | 6.21   | 15.23  | 23.74  | 13.26  | 17.33  | 13.67  | 36.34  | 10.35  | 15.04  | 15.4   | 5.02   | 36.34  | 13.429 | 18.649 | 0.4737 | 0.5567 |
| hsa-miR-548ay-5p | 19.11  | 29.78  | 4.45   | 15.79  | 5.74   | 20.54  | 18.46  | 10     | 13.66  | 8.84   | 5.94   | 10.07  | 5.37   | 0      | 0      | 24.01  | 31.41  | 8.07   | 24.03  | 1.49   | 14.637 | 11.039 | -0.407 | 0.5568 |
| hsa-miR-3675-5p  | 1.91   | 0      | 9.51   | 3.73   | 7.17   | 0      | 1.42   | 0.4    | 0.62   | 2.46   | 31.65  | 1.59   | 7.17   | 11.8   | 2.95   | 1.18   | 1.77   | 0.45   | 0      | 0      | 2.722  | 5.856  | 1.1052 | 0.5587 |
| hsa-miR-582-3p   | 9.56   | 58.18  | 20.79  | 11.48  | 1.43   | 20.54  | 20.16  | 10.79  | 21.73  | 2.95   | 25.71  | 38.71  | 11.95  | 6.83   | 3.93   | 13.41  | 23.45  | 15.7   | 18.29  | 5.66   | 17.761 | 16.364 | -0.118 | 0.5589 |
| hsa-miR-95-3p    | 10.7   | 41.21  | 0      | 7.75   | 0      | 14.67  | 8.8    | 0      | 3.73   | 2.46   | 0      | 11.67  | 1.19   | 0      | 0      | 8.47   | 23.89  | 10.47  | 7.89   | 0      | 8.932  | 6.358  | -0.49  | 0.559  |
| hsa-miR-23a-5p   | 6.88   | 6.93   | 52.58  | 4.88   | 10.04  | 5.87   | 4.83   | 40.77  | 10.56  | 8.85   | 39.56  | 5.3    | 10.16  | 29.2   | 26.52  | 5.41   | 4.87   | 6.58   | 4.3    | 24.42  | 15.219 | 15.632 | 0.0386 | 0.5599 |
| hsa-miR-147b     | 7.26   | 5.89   | 46.34  | 0.86   | 17.22  | 6.85   | 5.11   | 85.54  | 5.59   | 1.47   | 51.43  | 9.55   | 22.1   | 28.57  | 17.68  | 11.77  | 4.42   | 4.93   | 1.79   | 18.17  | 18.213 | 17.041 | -0.096 | 0.5612 |
| hsa-miR-3148     | 0      | 0      | 0      | 0      | 0      | 0      | 0      | 2      | 0      | 0      | 0      | 0      | 0      | 0      | 0      | 0      | 0      | 0.3    | 0      | 0      | 0.2    | 0.03   | -2.737 | 0.562  |

|                   |        |        |       |        |        |        |        |        |        |        |        |        |        |        |        |       |        |        |        |        |        |        |        |        |
|-------------------|--------|--------|-------|--------|--------|--------|--------|--------|--------|--------|--------|--------|--------|--------|--------|-------|--------|--------|--------|--------|--------|--------|--------|--------|
| hsa-miR-769-3p    | 1.15   | 2.42   | 2.97  | 1.15   | 0      | 0.98   | 0      | 9.59   | 0      | 0.49   | 0      | 4.24   | 1.79   | 0      | 1.96   | 1.18  | 0.88   | 0.3    | 2.15   | 0      | 1.875  | 1.25   | -0.585 | 0.5627 |
| hsa-miR-1914-5p   | 0      | 0      | 0     | 0      | 0      | 0      | 0      | 0      | 1.86   | 1.47   | 0      | 0.53   | 0      | 0      | 0      | 0     | 0      | 0      | 0.72   | 0      | 0.333  | 0.125  | -1.414 | 0.5628 |
| hsa-miR-5009-5p   | 4.97   | 5.89   | 2.38  | 9.18   | 7.17   | 7.34   | 10.22  | 5.6    | 14.9   | 2.46   | 11.87  | 12.2   | 10.16  | 13.04  | 0.98   | 8     | 4.87   | 2.69   | 1.43   | 2.38   | 7.011  | 6.762  | -0.052 | 0.5637 |
| hsa-miR-548ah-2   | 4.58   | 5.54   | 0     | 4.6    | 2.86   | 3.92   | 3.98   | 0      | 3.72   | 0.98   | 3.96   | 5.3    | 2.38   | 0      | 1.96   | 4.71  | 9.74   | 5.08   | 4.3    | 7.14   | 3.018  | 4.457  | 0.5625 | 0.5641 |
| hsa-miR-3198      | 2.68   | 1.04   | 29.11 | 1.15   | 2.87   | 2.45   | 3.12   | 33.98  | 1.86   | 6.39   | 39.56  | 2.12   | 7.17   | 6.83   | 20.63  | 3.29  | 2.21   | 1.35   | 0      | 9.83   | 8.465  | 9.299  | 0.1356 | 0.5656 |
| hsa-miR-548p      | 2.29   | 2.77   | 0     | 2.58   | 1.43   | 1.96   | 1.99   | 0      | 1.86   | 0.49   | 1.98   | 2.65   | 1.19   | 0      | 0.98   | 2.59  | 4.87   | 2.54   | 2.15   | 3.57   | 1.537  | 2.252  | 0.5511 | 0.5668 |
| hsa-miR-24-2-5p   | 76.07  | 71.33  | 48.72 | 35.87  | 31.57  | 71.9   | 46.57  | 37.17  | 36.01  | 7.37   | 199.77 | 87.5   | 59.74  | 29.82  | 34.38  | 57.66 | 78.3   | 87.02  | 20.09  | 47.36  | 46.258 | 70.164 | 0.601  | 0.5676 |
| hsa-miR-34c-3p    | 0.38   | 0.35   | 0     | 0      | 1.43   | 0.98   | 0      | 0.4    | 0      | 0      | 0      | 0.53   | 0      | 0      | 0      | 0     | 0.44   | 0.3    | 0      | 0      | 0.354  | 0.127  | -1.479 | 0.5683 |
| hsa-miR-942-3p    | 3.44   | 1.73   | 2.97  | 2.3    | 0      | 4.4    | 5.96   | 1.2    | 5.59   | 3.44   | 0      | 2.12   | 1.79   | 3.73   | 1.96   | 3.06  | 3.1    | 3.14   | 5.38   | 0      | 3.103  | 2.428  | -0.354 | 0.5685 |
| hsa-miR-933       | 1.53   | 0.35   | 0     | 1.15   | 2.87   | 0.49   | 2.27   | 4      | 0.62   | 1.47   | 0      | 2.65   | 0.6    | 2.48   | 4.91   | 0.47  | 3.1    | 1.2    | 1.43   | 3.87   | 1.475  | 2.071  | 0.4896 | 0.5689 |
| hsa-miR-424-5p    | 3.44   | 13.85  | 0.3   | 2.87   | 5.74   | 1.96   | 3.69   | 2.4    | 6.21   | 1.47   | 0      | 5.83   | 4.18   | 3.11   | 17.68  | 8.71  | 13.71  | 3.44   | 1.08   | 1.19   | 4.193  | 5.893  | 0.491  | 0.5692 |
| hsa-miR-6861-3p   | 0.38   | 0      | 0     | 0      | 7.17   | 0.49   | 0.57   | 0.4    | 0.62   | 0.49   | 0      | 0      | 0      | 0      | 0      | 0.47  | 0      | 0      | 0      | 4.47   | 1.012  | 0.494  | -1.035 | 0.5697 |
| hsa-miR-3146      | 0.76   | 0.69   | 0     | 1.15   | 0      | 0.98   | 1.14   | 0      | 0      | 1.47   | 3.96   | 2.12   | 1.19   | 0      | 0      | 2.35  | 2.21   | 0.3    | 0.36   | 0      | 0.619  | 1.249  | 1.0128 | 0.5699 |
| hsa-miR-6738-3p   | 0      | 0      | 0     | 0      | 0      | 0.98   | 0      | 0      | 0      | 0      | 0      | 0      | 0      | 0      | 0      | 0     | 0      | 0.15   | 0      | 0      | 0.098  | 0.015  | -2.708 | 0.57   |
| hsa-miR-6516-5p   | 1.91   | 2.42   | 1.78  | 1.72   | 2.87   | 2.45   | 0.28   | 2      | 1.86   | 2.46   | 3.96   | 5.3    | 0      | 3.11   | 3.93   | 2.82  | 3.54   | 5.38   | 1.08   | 0      | 1.975  | 2.912  | 0.5602 | 0.5708 |
| hsa-miR-4422      | 0      | 0      | 0     | 0.29   | 0      | 0      | 0      | 0      | 0      | 0      | 0      | 0      | 1.79   | 0      | 0      | 0     | 0      | 0      | 0      | 0      | 0.029  | 0.179  | 2.6258 | 0.5711 |
| hsa-miR-450a-2-3p | 1.91   | 3.81   | 0     | 0.57   | 2.87   | 0.49   | 1.42   | 0      | 0      | 1.47   | 0      | 1.59   | 0      | 0.62   | 1.96   | 0.71  | 1.77   | 0.75   | 1.43   | 0      | 1.254  | 0.883  | -0.506 | 0.5716 |
| hsa-miR-101-5p    | 1.53   | 1.39   | 0     | 1.15   | 0      | 0.98   | 1.42   | 0      | 0      | 0      | 0      | 2.65   | 1.19   | 0      | 2.95   | 1.18  | 0.88   | 1.5    | 0.36   | 0      | 0.647  | 1.071  | 0.7271 | 0.5731 |
| hsa-miR-629-5p    | 746.58 | 841.81 | 11922 | 817.05 | 4444.1 | 1045.7 | 1868.2 | 5912.6 | 1397.1 | 4037.2 | 4933   | 1582.9 | 2971.5 | 6904.5 | 5593.8 | 2009  | 1207.7 | 1475.2 | 947.94 | 3548.8 | 3303.2 | 3117.4 | -0.084 | 0.5734 |
| hsa-miR-125a-5p   | 472.11 | 79.64  | 7.72  | 278.67 | 229.6  | 458.78 | 187.98 | 39.57  | 162.06 | 244.25 | 288.78 | 411.5  | 83.04  | 36.65  | 95.28  | 95.55 | 554.76 | 303.96 | 707.64 | 243.34 | 216.04 | 282.05 | 0.3847 | 0.5775 |

|                  |        |        |        |        |        |        |        |        |        |        |        |       |        |        |        |        |        |        |        |        |        |        |        |        |
|------------------|--------|--------|--------|--------|--------|--------|--------|--------|--------|--------|--------|-------|--------|--------|--------|--------|--------|--------|--------|--------|--------|--------|--------|--------|
| hsa-miR-548d-5p  | 10.32  | 15.24  | 3.56   | 7.75   | 2.87   | 11.74  | 9.37   | 6      | 8.07   | 4.42   | 3.96   | 5.83  | 3.58   | 0      | 0      | 12.71  | 17.25  | 4.93   | 12.91  | 1.19   | 7.934  | 6.236  | -0.347 | 0.5785 |
| hsa-miR-345-5p   | 173.55 | 165.52 | 657.42 | 111.06 | 338.65 | 128.63 | 189.69 | 546.41 | 142.81 | 101.73 | 630.97 | 283.7 | 210.29 | 287.61 | 249.49 | 205.21 | 175.19 | 237.72 | 71.73  | 296.05 | 255.55 | 264.8  | 0.0513 | 0.5789 |
| hsa-miR-598-3p   | 16.44  | 22.85  | 0      | 14.35  | 0      | 8.8    | 24.14  | 1.2    | 11.18  | 1.97   | 7.91   | 9.55  | 3.58   | 0      | 2.95   | 18.83  | 19.47  | 23.02  | 2.15   | 2.08   | 10.093 | 8.954  | -0.173 | 0.5794 |
| hsa-miR-365b-5p  | 1.15   | 1.04   | 0.89   | 2.01   | 7.17   | 3.42   | 2.84   | 3.6    | 1.86   | 1.47   | 5.93   | 0.53  | 3.58   | 2.48   | 6.88   | 1.65   | 2.21   | 0.9    | 3.59   | 6.85   | 2.545  | 3.46   | 0.4431 | 0.5794 |
| hsa-miR-642a-5p  | 2.68   | 0.35   | 0      | 0.57   | 0      | 0      | 0.57   | 0      | 0.62   | 0      | 0      | 2.12  | 0      | 0      | 0      | 0      | 0.88   | 0.6    | 0      | 0      | 0.479  | 0.36   | -0.412 | 0.5798 |
| hsa-miR-2355-5p  | 0      | 0.69   | 0      | 0      | 0      | 0      | 0      | 0      | 0      | 0      | 0      | 0     | 0      | 0      | 0      | 0.47   | 0.44   | 1.35   | 0      | 0      | 0.069  | 0.226  | 1.7117 | 0.5799 |
| hsa-miR-135b-5p  | 0      | 0.69   | 0      | 0      | 0      | 0      | 0      | 0      | 0      | 0      | 0      | 0     | 0      | 0      | 0.98   | 0      | 0      | 0.9    | 0.36   | 0      | 0.069  | 0.224  | 1.6988 | 0.5803 |
| hsa-miR-625-3p   | 457.96 | 91.07  | 0      | 105.04 | 5.74   | 363.4  | 116.71 | 6      | 91.27  | 70.28  | 27.69  | 98.1  | 18.52  | 6.83   | 17.68  | 59.3   | 253.49 | 233.24 | 219.86 | 41.1   | 130.75 | 97.581 | -0.422 | 0.5807 |
| hsa-miR-3127-5p  | 3.82   | 2.77   | 8.62   | 2.87   | 12.91  | 5.38   | 5.96   | 7.59   | 6.83   | 8.85   | 3.96   | 5.83  | 10.75  | 1.86   | 12.77  | 3.29   | 3.1    | 1.94   | 5.38   | 8.94   | 6.56   | 5.782  | -0.182 | 0.5816 |
| hsa-miR-760      | 67.28  | 11.08  | 48.72  | 53.38  | 114.8  | 77.77  | 47.14  | 87.54  | 44.71  | 104.19 | 308.56 | 68.41 | 37.64  | 122.37 | 134.56 | 37.18  | 77.86  | 51.58  | 55.59  | 94.71  | 65.661 | 98.846 | 0.5901 | 0.5822 |
| hsa-miR-5708     | 0      | 0      | 0      | 0      | 0      | 0.49   | 0.28   | 0      | 0      | 0      | 0      | 1.06  | 0      | 0      | 0      | 0      | 0      | 0      | 0.72   | 0      | 0.077  | 0.178  | 1.2089 | 0.5833 |
| hsa-miR-4433a-5p | 0.76   | 0      | 0      | 0      | 0      | 0.49   | 0.57   | 0.4    | 0.62   | 0.49   | 0      | 0     | 0.6    | 0      | 0      | 0      | 0.44   | 0.9    | 2.51   | 0      | 0.333  | 0.445  | 0.4183 | 0.5833 |
| hsa-miR-4664-5p  | 0      | 0      | 0      | 0      | 0      | 0      | 0      | 0      | 1.86   | 0      | 0      | 0     | 0      | 0      | 0      | 0      | 0.44   | 0      | 0      | 0      | 0.186  | 0.044  | -2.08  | 0.5834 |
| hsa-miR-30a-3p   | 109.71 | 95.23  | 5.05   | 49.65  | 60.27  | 72.39  | 63.89  | 3.2    | 27.94  | 18.67  | 96.92  | 68.94 | 17.33  | 6.21   | 24.56  | 43.07  | 98.65  | 76.85  | 28.33  | 32.46  | 50.6   | 49.332 | -0.037 | 0.5852 |
| hsa-miR-937-5p   | 0      | 0      | 0      | 0      | 0      | 0      | 0      | 0      | 0      | 1.47   | 0      | 0     | 0      | 0.62   | 0      | 0      | 0      | 0      | 0      | 0      | 0.147  | 0.062  | -1.246 | 0.5856 |
| hsa-miR-550a-3p  | 9.18   | 9.7    | 0      | 1.72   | 5.74   | 2.94   | 3.98   | 6.4    | 4.96   | 0      | 0      | 1.06  | 1.2    | 2.48   | 0      | 7.54   | 0.88   | 15.84  | 1.44   | 3.58   | 4.462  | 3.402  | -0.391 | 0.5866 |
| hsa-miR-4672     | 1.15   | 1.04   | 0      | 2.58   | 2.87   | 2.45   | 1.14   | 0      | 0      | 0      | 0      | 0     | 2.39   | 0      | 0      | 1.65   | 1.77   | 0.6    | 0.72   | 0      | 1.123  | 0.713  | -0.655 | 0.5868 |
| hsa-miR-218-5p   | 8.4    | 22.86  | 16.04  | 17.22  | 0      | 25.44  | 16.46  | 19.18  | 9.94   | 1.96   | 11.86  | 15.9  | 3.58   | 1.24   | 21.6   | 26.36  | 19.46  | 9.86   | 2.16   | 22.04  | 13.75  | 13.406 | -0.037 | 0.5875 |
| hsa-miR-671-3p   | 48.55  | 6.93   | 1.78   | 15.5   | 7.17   | 35.7   | 15.33  | 5.6    | 17.39  | 31.45  | 27.69  | 25.98 | 11.35  | 6.83   | 24.56  | 5.88   | 32.74  | 38.87  | 41.6   | 43.19  | 18.54  | 25.869 | 0.4806 | 0.5895 |
| hsa-miR-641      | 11.47  | 4.85   | 3.86   | 3.16   | 1.43   | 4.4    | 1.99   | 0      | 6.21   | 1.47   | 9.89   | 12.2  | 7.77   | 0      | 9.82   | 2.35   | 11.06  | 8.07   | 1.08   | 0      | 3.884  | 6.224  | 0.6803 | 0.5896 |

|                  |        |       |       |       |       |       |       |       |       |       |       |       |       |       |       |       |        |        |       |       |        |        |        |        |
|------------------|--------|-------|-------|-------|-------|-------|-------|-------|-------|-------|-------|-------|-------|-------|-------|-------|--------|--------|-------|-------|--------|--------|--------|--------|
| hsa-miR-3157-3p  | 3.82   | 1.39  | 0     | 4.02  | 8.61  | 2.45  | 5.68  | 7.19  | 1.86  | 1.47  | 9.89  | 3.18  | 5.97  | 0     | 12.77 | 2.59  | 2.65   | 5.38   | 1.08  | 11.32 | 3.649  | 5.483  | 0.5875 | 0.5897 |
| hsa-miR-5189-3p  | 0      | 0.69  | 5.05  | 1.15  | 0     | 0     | 0     | 1.2   | 0     | 0     | 0     | 0     | 1.79  | 0     | 0     | 1.18  | 0      | 0      | 1.43  | 0     | 0.809  | 0.44   | -0.879 | 0.5907 |
| hsa-miR-5193     | 4.59   | 1.73  | 0     | 0.57  | 1.43  | 2.93  | 3.98  | 0     | 1.24  | 0.98  | 0     | 1.06  | 1.79  | 0     | 1.96  | 0     | 1.77   | 2.84   | 2.87  | 0     | 1.745  | 1.229  | -0.506 | 0.5915 |
| hsa-miR-24-1-5p  | 3.06   | 4.85  | 0.3   | 3.73  | 1.43  | 4.4   | 3.12  | 1.6   | 3.73  | 0.98  | 3.96  | 5.3   | 0.6   | 0     | 1.96  | 4.94  | 8.41   | 10.02  | 1.08  | 4.77  | 2.72   | 4.104  | 0.5934 | 0.5932 |
| hsa-miR-122-3p   | 0.76   | 1.73  | 0     | 0.29  | 4.3   | 0     | 0.28  | 0     | 1.24  | 0     | 0     | 0     | 0     | 0     | 0     | 0.71  | 0      | 1.35   | 1.43  | 0     | 0.86   | 0.349  | -1.301 | 0.5933 |
| hsa-miR-7111-3p  | 0      | 0     | 0     | 0.29  | 0     | 0     | 0     | 0     | 0.62  | 0     | 0     | 1.06  | 0     | 0     | 0     | 0     | 0      | 0      | 0.72  | 0     | 0.091  | 0.178  | 0.9679 | 0.5933 |
| hsa-miR-146a-3p  | 10.7   | 13.16 | 0     | 3.16  | 4.3   | 7.83  | 0     | 17.19 | 4.35  | 4.42  | 7.91  | 20.15 | 9.56  | 0     | 4.91  | 12.71 | 26.1   | 0      | 5.74  | 5.06  | 6.511  | 9.214  | 0.5009 | 0.5938 |
| hsa-miR-548ad-5p | 36.69  | 54.71 | 4.45  | 32.15 | 11.48 | 37.66 | 36.35 | 14    | 22.36 | 18.67 | 9.9   | 18.55 | 7.16  | 0     | 0.98  | 46.37 | 58.84  | 13.15  | 47.7  | 1.49  | 26.852 | 20.414 | -0.396 | 0.594  |
| hsa-miR-548ae-5p | 36.69  | 54.71 | 4.45  | 32.15 | 11.48 | 37.66 | 36.35 | 14    | 22.36 | 18.67 | 9.9   | 18.55 | 7.16  | 0     | 0.98  | 46.37 | 58.84  | 13.15  | 47.7  | 1.49  | 26.852 | 20.414 | -0.396 | 0.594  |
| hsa-miR-20b-3p   | 0.76   | 0.35  | 0     | 0     | 5.74  | 1.47  | 0.85  | 0     | 0     | 0.49  | 0     | 0     | 0     | 0     | 0     | 0.94  | 0.44   | 1.2    | 1.43  | 0     | 0.966  | 0.401  | -1.268 | 0.5954 |
| hsa-miR-4306     | 0.76   | 0.69  | 0.3   | 1.15  | 1.43  | 1.47  | 0.85  | 1.6   | 1.86  | 0.98  | 1.98  | 1.59  | 0.6   | 0     | 0.98  | 2.12  | 0      | 6.43   | 0.36  | 2.08  | 1.109  | 1.614  | 0.5414 | 0.5959 |
| hsa-miR-1908-3p  | 0.38   | 0     | 1.49  | 0     | 0     | 0     | 0     | 0     | 0     | 0     | 0     | 0.53  | 0     | 0     | 0     | 0     | 0      | 0.45   | 0     | 0     | 0.187  | 0.098  | -0.932 | 0.5962 |
| hsa-miR-5001-3p  | 2.68   | 2.77  | 4.75  | 1.15  | 1.43  | 1.47  | 1.14  | 4     | 1.86  | 0     | 0     | 2.65  | 4.18  | 1.86  | 6.88  | 3.77  | 2.21   | 2.84   | 2.87  | 0     | 2.125  | 2.726  | 0.3593 | 0.5962 |
| hsa-miR-3680-5p  | 0.76   | 0     | 0     | 0.57  | 0     | 0     | 0.28  | 1.2   | 1.24  | 0.49  | 0     | 1.06  | 0     | 0     | 0     | 0.71  | 0.88   | 0.15   | 0.36  | 0     | 0.454  | 0.316  | -0.523 | 0.5963 |
| hsa-miR-2276-3p  | 1.53   | 0.35  | 3.56  | 0.57  | 2.87  | 0.98  | 1.7   | 5.6   | 1.24  | 2.95  | 0     | 3.18  | 0     | 1.86  | 0     | 1.18  | 0.44   | 2.69   | 3.23  | 2.98  | 2.135  | 1.556  | -0.456 | 0.5966 |
| hsa-let-7e-5p    | 118.12 | 32.2  | 2.38  | 47.64 | 83.23 | 81.68 | 49.69 | 8.39  | 31.67 | 59.46 | 90.99 | 82.72 | 20.31 | 19.26 | 25.54 | 28.48 | 189.79 | 136.65 | 42.32 | 95.9  | 51.446 | 73.196 | 0.5087 | 0.5967 |
| hsa-miR-3150b-3p | 12.23  | 1.73  | 45.15 | 8.61  | 33    | 7.83  | 10.51 | 23.58 | 7.45  | 14.74 | 79.12 | 15.38 | 11.35 | 54.04 | 30.45 | 7.3   | 2.65   | 12.41  | 6.1   | 38.72 | 16.483 | 25.752 | 0.6437 | 0.597  |
| hsa-miR-570-3p   | 0.76   | 1.04  | 0     | 0.29  | 0     | 0     | 0     | 0.4   | 0     | 0     | 0     | 0     | 0     | 0     | 0     | 0.47  | 0.88   | 0.15   | 0     | 0     | 0.249  | 0.15   | -0.731 | 0.5981 |
| hsa-miR-4688     | 0.38   | 0     | 0     | 0.57  | 0     | 0.98  | 0     | 2     | 1.86  | 0.49  | 0     | 0.53  | 0.6   | 1.24  | 0     | 0.94  | 0      | 1.05   | 0     | 0     | 0.628  | 0.436  | -0.526 | 0.5997 |
| hsa-miR-6511b-3p | 4.59   | 2.08  | 0     | 3.73  | 0     | 6.85  | 3.41  | 6     | 3.1   | 1.47  | 0     | 4.24  | 2.99  | 0     | 0     | 3.29  | 3.1    | 2.24   | 17.93 | 1.79  | 3.123  | 3.558  | 0.1881 | 0.6004 |

|                 |        |        |        |        |        |        |        |        |        |        |        |        |        |        |        |        |        |        |        |        |        |        |        |        |
|-----------------|--------|--------|--------|--------|--------|--------|--------|--------|--------|--------|--------|--------|--------|--------|--------|--------|--------|--------|--------|--------|--------|--------|--------|--------|
| hsa-miR-423-3p  | 6498.2 | 1770.9 | 5926.3 | 4021.9 | 3956.2 | 6636.6 | 4700.1 | 3256.9 | 3794.4 | 4571.4 | 7229.5 | 5049.3 | 3974   | 5426.1 | 5446.4 | 3579.2 | 5462.6 | 7187.3 | 5777.7 | 10392  | 4513.3 | 5952.4 | 0.3993 | 0.6008 |
| hsa-miR-1296-5p | 1.15   | 1.39   | 0      | 0.86   | 0      | 1.96   | 1.14   | 0      | 0.62   | 0.98   | 7.91   | 1.59   | 0.6    | 0      | 0      | 0.94   | 3.1    | 1.35   | 1.08   | 0      | 0.81   | 1.657  | 1.0326 | 0.6027 |
| hsa-miR-6509-5p | 0      | 0      | 0.89   | 0.57   | 0      | 0.98   | 1.14   | 0      | 0      | 0.49   | 0      | 1.06   | 0      | 0      | 0.98   | 0      | 0      | 0      | 0.72   | 0      | 0.407  | 0.276  | -0.56  | 0.6035 |
| hsa-miR-3140-3p | 3.44   | 3.46   | 0      | 4.02   | 4.3    | 1.47   | 8.8    | 0      | 0.62   | 4.42   | 3.96   | 1.59   | 2.99   | 0      | 0.98   | 3.06   | 1.33   | 3.44   | 4.3    | 4.47   | 3.053  | 2.612  | -0.225 | 0.6054 |
| hsa-miR-483-3p  | 9.56   | 5.89   | 3.56   | 9.76   | 0      | 12.23  | 8.52   | 0      | 3.1    | 14.74  | 0      | 8.48   | 0.6    | 0      | 3.93   | 4.94   | 7.08   | 4.19   | 46.27  | 3.28   | 6.736  | 7.877  | 0.2258 | 0.6096 |
| hsa-miR-27a-3p  | 2791   | 4917.2 | 71.59  | 1391   | 637.13 | 2066.9 | 1516.6 | 165.48 | 1115.8 | 129.25 | 1157.1 | 1600.4 | 326.19 | 41.62  | 221    | 1839.8 | 3414.8 | 2524.7 | 1302.3 | 503.95 | 1480.2 | 1293.2 | -0.195 | 0.6103 |
| hsa-miR-1976    | 4.2    | 1.04   | 2.67   | 11.19  | 2.87   | 5.38   | 4.83   | 2      | 4.35   | 12.78  | 0      | 5.3    | 3.58   | 0      | 0.98   | 8.47   | 3.98   | 7.63   | 29.05  | 1.49   | 5.131  | 6.048  | 0.2372 | 0.6105 |
| hsa-miR-5481    | 1.53   | 3.81   | 0      | 0.86   | 0      | 1.96   | 3.41   | 0      | 0      | 0.98   | 0      | 4.24   | 0.6    | 0      | 0      | 2.82   | 2.65   | 3.29   | 2.87   | 1.19   | 1.255  | 1.766  | 0.4928 | 0.6158 |
| hsa-miR-668-3p  | 0.76   | 0.35   | 0      | 0      | 0      | 0      | 0.28   | 0      | 0      | 0.98   | 0      | 0      | 0      | 0      | 0      | 0      | 0      | 0      | 0.72   | 0.3    | 0.237  | 0.102  | -1.216 | 0.6169 |
| hsa-miR-331-5p  | 42.81  | 23.2   | 2.97   | 25.25  | 63.14  | 27.88  | 34.08  | 13.59  | 18.01  | 32.93  | 15.82  | 29.17  | 17.92  | 7.45   | 12.77  | 30.59  | 37.16  | 32     | 21.88  | 51.82  | 28.386 | 25.658 | -0.146 | 0.6183 |
| hsa-miR-1307-3p | 2591.4 | 400.3  | 5106   | 1554.3 | 2670.5 | 2196.6 | 1511   | 5795.1 | 1421.3 | 2297   | 4804.5 | 2988.1 | 2129.2 | 5432.9 | 6157.6 | 1212   | 1636   | 2253.3 | 850.75 | 8421.2 | 2554.3 | 3588.5 | 0.4904 | 0.6194 |
| hsa-miR-4804-5p | 0.76   | 0      | 0      | 0      | 2.87   | 0.49   | 0      | 0      | 0      | 0      | 0      | 0      | 0      | 0      | 0      | 0.24   | 0.44   | 0.6    | 0      | 0      | 0.412  | 0.128  | -1.687 | 0.6195 |
| hsa-miR-142-5p  | 5476   | 10432  | 103.97 | 4716.9 | 1104.9 | 4304.6 | 3840.9 | 313.78 | 3321.9 | 950.45 | 4725.4 | 3216.7 | 945.11 | 72.06  | 998.92 | 5370.1 | 5919.6 | 6012.8 | 3758.1 | 537.31 | 3456.6 | 3155.6 | -0.131 | 0.6202 |
| hsa-miR-7850-5p | 3.06   | 0.69   | 0      | 0.57   | 5.74   | 0      | 0.57   | 1.6    | 2.48   | 5.41   | 5.93   | 0.53   | 1.79   | 0      | 1.96   | 0.71   | 0.44   | 1.2    | 3.95   | 0      | 2.012  | 1.651  | -0.285 | 0.6204 |
| hsa-miR-30a-5p  | 782.51 | 1442.6 | 93.28  | 501.94 | 190.85 | 739.52 | 894.76 | 171.48 | 514.73 | 162.67 | 217.58 | 1016.5 | 459.41 | 58.39  | 158.14 | 795.66 | 1017.5 | 636.17 | 375.88 | 182.87 | 549.44 | 491.81 | -0.16  | 0.6213 |
| hsa-miR-6715b-2 | 0      | 0      | 1.78   | 0      | 0      | 0      | 0      | 0      | 1.24   | 0      | 0      | 0      | 1.19   | 0      | 0      | 0      | 0.44   | 0.15   | 0      | 0      | 0.302  | 0.178  | -0.763 | 0.6215 |
| hsa-miR-4489    | 3.06   | 1.04   | 7.43   | 4.3    | 22.96  | 1.96   | 1.42   | 6.4    | 3.73   | 11.3   | 9.89   | 2.12   | 7.77   | 14.29  | 10.8   | 3.77   | 1.33   | 0.75   | 2.15   | 2.68   | 6.36   | 5.555  | -0.195 | 0.6223 |
| hsa-let-7f-2-3p | 2.68   | 7.27   | 0      | 2.58   | 1.43   | 0.98   | 2.27   | 1.6    | 2.48   | 0.49   | 0      | 6.89   | 0      | 0      | 0      | 3.06   | 2.65   | 2.39   | 1.79   | 0      | 2.178  | 1.678  | -0.376 | 0.6229 |
| hsa-miR-30b-5p  | 22.17  | 65.79  | 9.8    | 14.64  | 7.17   | 18.59  | 15.9   | 6.4    | 21.73  | 3.44   | 0      | 20.15  | 10.75  | 3.11   | 20.63  | 25.18  | 30.97  | 41.12  | 8.61   | 5.36   | 18.563 | 16.588 | -0.162 | 0.6242 |
| hsa-miR-6827-5p | 0      | 0      | 0      | 0      | 2.87   | 0      | 0      | 2.8    | 0      | 0      | 0      | 0      | 0.6    | 0      | 0      | 0      | 0      | 0      | 1.08   | 0      | 0.567  | 0.168  | -1.755 | 0.6243 |

|                   |        |        |        |        |        |        |        |        |        |        |        |        |        |        |        |        |        |        |        |        |        |        |        |        |
|-------------------|--------|--------|--------|--------|--------|--------|--------|--------|--------|--------|--------|--------|--------|--------|--------|--------|--------|--------|--------|--------|--------|--------|--------|--------|
| hsa-miR-3934-5p   | 3.44   | 4.5    | 10.1   | 0.29   | 1.43   | 2.45   | 2.56   | 1.2    | 10.56  | 2.95   | 23.74  | 3.18   | 1.79   | 2.48   | 2.95   | 3.53   | 2.65   | 3.59   | 2.87   | 2.68   | 3.948  | 4.946  | 0.3251 | 0.6248 |
| hsa-miR-548j-3p   | 2.29   | 1.73   | 0      | 1.15   | 0      | 1.96   | 0.85   | 2      | 0.62   | 0.49   | 0      | 7.42   | 1.19   | 0      | 2.95   | 0.24   | 3.54   | 0.9    | 0      | 1.49   | 1.109  | 1.773  | 0.6769 | 0.6254 |
| hsa-miR-4655-5p   | 0      | 0      | 0      | 0.57   | 0      | 0.49   | 0      | 2.4    | 0.62   | 0      | 0      | 0      | 0.6    | 0      | 0      | 0      | 0.44   | 0      | 0.36   | 1.49   | 0.408  | 0.289  | -0.498 | 0.6258 |
| hsa-miR-103a-2-5p | 0.38   | 0.35   | 0.3    | 0      | 0      | 0      | 0.28   | 1.2    | 0.62   | 0      | 0      | 0      | 0      | 0      | 0      | 0.24   | 0.44   | 1.05   | 0      | 0      | 0.313  | 0.173  | -0.855 | 0.6267 |
| hsa-miR-6754-5p   | 0      | 0      | 2.97   | 0.29   | 0      | 1.47   | 0      | 0      | 0      | 0      | 0      | 3.18   | 0      | 4.35   | 1.96   | 0      | 0      | 0      | 0      | 0      | 0.473  | 0.949  | 1.0046 | 0.629  |
| hsa-miR-4511      | 3.44   | 6.93   | 4.16   | 4.59   | 0      | 6.85   | 9.94   | 11.19  | 5.59   | 10.81  | 11.87  | 11.14  | 19.12  | 0      | 1.96   | 16.24  | 7.08   | 4.93   | 7.53   | 7.15   | 6.35   | 8.702  | 0.4546 | 0.629  |
| hsa-let-7d-3p     | 785.57 | 504.53 | 46.94  | 462.34 | 345.83 | 902.39 | 471.66 | 63.95  | 401.73 | 505.69 | 450.98 | 454.45 | 110.52 | 25.47  | 211.18 | 377.24 | 839.66 | 942.37 | 1699.7 | 348.18 | 449.06 | 545.98 | 0.2819 | 0.629  |
| hsa-miR-181b-3p   | 1.53   | 0      | 0      | 1.15   | 0      | 0.49   | 0      | 0      | 0.62   | 0      | 1.98   | 1.06   | 0      | 0      | 2.95   | 0.71   | 1.77   | 0.3    | 0      | 0      | 0.379  | 0.877  | 1.2104 | 0.6322 |
| hsa-let-7e-3p     | 0.76   | 2.42   | 0      | 1.43   | 0      | 0.49   | 1.99   | 0      | 0      | 0      | 0      | 1.06   | 0      | 0      | 0      | 0.47   | 3.1    | 2.84   | 0      | 5.66   | 0.709  | 1.313  | 0.889  | 0.6327 |
| hsa-miR-6850-5p   | 2.29   | 1.39   | 33.87  | 5.74   | 12.91  | 4.89   | 1.99   | 17.99  | 3.1    | 13.76  | 0      | 10.08  | 13.14  | 29.82  | 34.38  | 2.12   | 2.21   | 2.39   | 9.68   | 27.7   | 9.793  | 13.152 | 0.4255 | 0.6341 |
| hsa-miR-329-3p    | 5.73   | 11.43  | 0      | 0.86   | 0      | 5.87   | 2.56   | 0      | 3.73   | 6.39   | 0      | 3.18   | 0.6    | 0      | 0      | 3.77   | 7.08   | 5.08   | 6.46   | 1.49   | 3.657  | 2.766  | -0.403 | 0.6345 |
| hsa-miR-1271-5p   | 4.2    | 4.16   | 0      | 3.44   | 0      | 6.36   | 3.12   | 0      | 1.24   | 0      | 17.8   | 4.24   | 0.6    | 0      | 0      | 3.53   | 8.41   | 4.49   | 1.79   | 2.98   | 2.252  | 4.384  | 0.961  | 0.6346 |
| hsa-miR-210-3p    | 71.87  | 38.44  | 511.26 | 44.77  | 220.99 | 56.25  | 78.09  | 903.36 | 58.99  | 54.55  | 69.23  | 100.75 | 271.23 | 228.6  | 410.57 | 136.26 | 74.32  | 197.51 | 22.6   | 255.55 | 203.86 | 176.66 | -0.207 | 0.6347 |
| hsa-miR-330-5p    | 26.76  | 24.24  | 83.77  | 22.39  | 17.22  | 21.03  | 24.14  | 41.17  | 19.25  | 9.83   | 51.43  | 29.17  | 16.73  | 36.65  | 10.8   | 25.65  | 19.47  | 48.44  | 4.66   | 67.91  | 28.98  | 31.091 | 0.1014 | 0.6355 |
| hsa-miR-206       | 4.97   | 5.54   | 8.32   | 13.78  | 11.48  | 8.8    | 3.98   | 13.19  | 13.66  | 2.46   | 33.63  | 2.65   | 5.38   | 24.23  | 9.82   | 5.65   | 8.41   | 3.59   | 2.15   | 3.57   | 8.618  | 9.908  | 0.2012 | 0.6386 |
| hsa-miR-4690-5p   | 0.76   | 0      | 0.59   | 0      | 1.43   | 0      | 0      | 0.4    | 0      | 0      | 3.96   | 0      | 0      | 0      | 0      | 0      | 0      | 0      | 0      | 0      | 0.318  | 0.396  | 0.3165 | 0.6412 |
| hsa-miR-195-5p    | 9.17   | 12.12  | 0      | 3.16   | 0      | 7.34   | 3.98   | 0      | 1.24   | 0.49   | 1.98   | 2.65   | 0.6    | 0.62   | 2.95   | 4.47   | 11.06  | 4.63   | 2.87   | 0.6    | 3.75   | 3.243  | -0.21  | 0.6445 |
| hsa-miR-1537-3p   | 0      | 0.35   | 0      | 0      | 0      | 0      | 0      | 0      | 0      | 0      | 0      | 0.53   | 0      | 0      | 0      | 0.24   | 0      | 0.3    | 0      | 0      | 0.035  | 0.107  | 1.6122 | 0.645  |
| hsa-miR-3928-3p   | 32.88  | 4.85   | 136.36 | 11.48  | 93.27  | 23.48  | 9.94   | 68.35  | 11.8   | 18.18  | 148.35 | 21.21  | 46.6   | 124.86 | 93.31  | 15.77  | 16.37  | 27.66  | 8.97   | 84.59  | 41.059 | 58.769 | 0.5174 | 0.646  |
| hsa-miR-129-1-3p  | 0      | 0      | 0      | 0      | 0      | 0.49   | 0      | 2      | 0      | 0      | 0      | 0      | 0      | 0      | 0      | 0      | 0      | 0      | 0.72   | 0      | 0.249  | 0.072  | -1.79  | 0.6464 |

|                 |        |        |        |        |        |        |        |        |        |        |        |        |        |        |        |        |        |        |        |        |        |        |        |        |
|-----------------|--------|--------|--------|--------|--------|--------|--------|--------|--------|--------|--------|--------|--------|--------|--------|--------|--------|--------|--------|--------|--------|--------|--------|--------|
| hsa-miR-31-5p   | 1.53   | 1.73   | 0      | 1.15   | 0      | 1.96   | 0      | 1.2    | 0.62   | 0      | 0      | 0      | 0      | 0.62   | 0.98   | 0      | 0      | 1.79   | 0      | 12.21  | 0.819  | 1.56   | 0.9296 | 0.649  |
| hsa-miR-579-5p  | 4.97   | 4.85   | 31.19  | 5.17   | 2.87   | 2.93   | 7.1    | 28.38  | 11.18  | 2.46   | 0      | 10.61  | 25.09  | 22.98  | 12.77  | 12.24  | 3.98   | 10.91  | 2.15   | 33.95  | 10.11  | 13.468 | 0.4138 | 0.6491 |
| hsa-miR-6747-3p | 6.12   | 0      | 0      | 5.74   | 2.87   | 5.38   | 4.83   | 0.8    | 2.48   | 1.97   | 0      | 3.18   | 2.39   | 3.73   | 0      | 3.53   | 3.54   | 6.58   | 10.04  | 3.87   | 3.019  | 3.686  | 0.288  | 0.6493 |
| hsa-miR-1910-5p | 0.38   | 0      | 0      | 0      | 0      | 0      | 0      | 0      | 0      | 0      | 0      | 0      | 0      | 0      | 0      | 0.24   | 0.44   | 0      | 0.36   | 0      | 0.038  | 0.104  | 1.4525 | 0.6494 |
| hsa-miR-33b-3p  | 0.38   | 0      | 0      | 0      | 0      | 0.49   | 0.28   | 0      | 0      | 1.47   | 0      | 0      | 1.19   | 0      | 0      | 0      | 0      | 0      | 0      | 0      | 0.262  | 0.119  | -1.139 | 0.6508 |
| hsa-miR-6894-3p | 0      | 0.35   | 0      | 0.57   | 0      | 0.98   | 0      | 0.8    | 0      | 0      | 0      | 0      | 0      | 0      | 0      | 0.24   | 0      | 0.6    | 0.72   | 0      | 0.27   | 0.156  | -0.791 | 0.6509 |
| hsa-miR-4695-3p | 0.76   | 0      | 0      | 0.29   | 0      | 0      | 0.28   | 0      | 0      | 0      | 0      | 0      | 0      | 0      | 0      | 0.24   | 0      | 0.15   | 0      | 0      | 0.133  | 0.039  | -1.77  | 0.6513 |
| hsa-miR-6819-3p | 0      | 0      | 1.78   | 1.15   | 1.43   | 0      | 0.28   | 1.2    | 0.62   | 0.49   | 0      | 0      | 0.6    | 0      | 0      | 0.47   | 0      | 0.3    | 2.15   | 0      | 0.695  | 0.352  | -0.981 | 0.6533 |
| hsa-miR-99b-5p  | 463.31 | 194.96 | 124.18 | 280.96 | 318.57 | 501.82 | 275.73 | 149.49 | 291.83 | 298.8  | 712.07 | 527.63 | 178.03 | 142.87 | 173.85 | 207.09 | 656.06 | 598.2  | 206.95 | 672.82 | 289.97 | 407.56 | 0.4911 | 0.6534 |
| hsa-miR-4512    | 0      | 0.35   | 0      | 0.29   | 0      | 0      | 0      | 0      | 0.62   | 0      | 0      | 0      | 0      | 0      | 0      | 0.24   | 0      | 0      | 0      | 0      | 0.126  | 0.024  | -2.392 | 0.6537 |
| hsa-miR-4775    | 0      | 0.69   | 0      | 0      | 1.43   | 0      | 0.57   | 0      | 0      | 0.49   | 0      | 0      | 0      | 0      | 0      | 0      | 0      | 0      | 0      | 1.79   | 0.318  | 0.179  | -0.829 | 0.6546 |
| hsa-miR-146a-5p | 12019  | 20560  | 4325.3 | 4506   | 5364   | 7631   | 8189.5 | 8535.5 | 3534.8 | 14794  | 11132  | 11747  | 10397  | 5154   | 7524.8 | 7985.1 | 18500  | 9668.9 | 4002.7 | 4612.4 | 8945.9 | 9072.4 | 0.0203 | 0.6546 |
| hsa-miR-6767-5p | 4.97   | 1.04   | 0      | 4.88   | 0      | 0.98   | 1.42   | 0.8    | 1.24   | 8.35   | 3.96   | 0      | 2.39   | 9.32   | 3.93   | 1.88   | 0.88   | 1.94   | 4.3    | 8.04   | 2.368  | 3.664  | 0.6298 | 0.6559 |
| hsa-miR-6774-3p | 0.38   | 0      | 0      | 0.29   | 0      | 0.49   | 0      | 0      | 0      | 0      | 0      | 0      | 0      | 0      | 0      | 0      | 0      | 0      | 0.36   | 0      | 0.116  | 0.036  | -1.688 | 0.6562 |
| hsa-miR-1246    | 347.1  | 209.15 | 570.37 | 156.98 | 772.02 | 378.56 | 258.69 | 451.68 | 167.02 | 580.89 | 1200.6 | 411.5  | 194.16 | 626.16 | 387.98 | 338.17 | 406.11 | 420.73 | 231.7  | 1112.4 | 389.25 | 532.96 | 0.4533 | 0.6577 |
| hsa-miR-6859-5p | 9.17   | 2.77   | 22.28  | 12.05  | 21.52  | 9.78   | 11.93  | 7.19   | 4.97   | 11.79  | 9.89   | 15.38  | 6.57   | 10.56  | 15.72  | 11.06  | 8.41   | 5.68   | 2.51   | 28.59  | 11.345 | 11.437 | 0.0117 | 0.6579 |
| hsa-miR-3124-5p | 6.88   | 1.39   | 7.43   | 4.3    | 2.87   | 6.36   | 3.98   | 6.4    | 4.97   | 6.88   | 9.89   | 3.18   | 3.58   | 7.45   | 10.8   | 4.24   | 5.31   | 6.43   | 2.15   | 2.38   | 5.146  | 5.541  | 0.1067 | 0.6603 |
| hsa-miR-6731-5p | 0      | 0.35   | 0      | 0      | 0      | 0.49   | 0.28   | 0      | 0      | 0      | 0      | 0      | 0      | 0      | 0      | 0.47   | 0      | 0      | 0      | 0      | 0.112  | 0.047  | -1.253 | 0.6604 |
| hsa-miR-5189-5p | 1.53   | 2.08   | 54.66  | 10.33  | 15.78  | 0.49   | 0.57   | 21.98  | 0      | 0.98   | 9.89   | 1.59   | 22.1   | 67.71  | 0.98   | 11.3   | 0.44   | 2.09   | 17.57  | 2.68   | 10.84  | 13.635 | 0.3309 | 0.6608 |
| hsa-miR-551a    | 0      | 0.69   | 0.3    | 0.29   | 0      | 0      | 0.85   | 2      | 1.24   | 3.44   | 9.89   | 2.65   | 0      | 0      | 5.89   | 0.24   | 0.88   | 1.64   | 0      | 0      | 0.881  | 2.119  | 1.2662 | 0.6617 |

|                   |        |        |        |        |        |        |        |        |        |        |        |        |        |        |        |        |        |        |        |        |        |        |        |        |
|-------------------|--------|--------|--------|--------|--------|--------|--------|--------|--------|--------|--------|--------|--------|--------|--------|--------|--------|--------|--------|--------|--------|--------|--------|--------|
| hsa-miR-378i      | 237.39 | 187.34 | 1462.2 | 144.64 | 3452.6 | 192.22 | 241.94 | 1572.9 | 180.68 | 637.4  | 4673.9 | 496.34 | 739    | 1866.7 | 1792.6 | 342.64 | 297.73 | 624.66 | 129.12 | 1073.1 | 830.92 | 1203.6 | 0.5345 | 0.6617 |
| hsa-miR-889-3p    | 3.44   | 2.42   | 0      | 0.57   | 2.87   | 0      | 4.54   | 0      | 0      | 1.47   | 1.98   | 2.65   | 0      | 0      | 0      | 0.94   | 2.65   | 4.19   | 6.46   | 0      | 1.531  | 1.887  | 0.3016 | 0.6621 |
| hsa-miR-6836-3p   | 0.38   | 0      | 0      | 0.29   | 0      | 0      | 0      | 0      | 0.62   | 0      | 0      | 0      | 0      | 0      | 0      | 0      | 0      | 0      | 0.36   | 0      | 0.129  | 0.036  | -1.841 | 0.663  |
| hsa-miR-4766-3p   | 0.38   | 0      | 0      | 0      | 0      | 0.49   | 0      | 0      | 0.62   | 0      | 0      | 0.53   | 0      | 0      | 0      | 0      | 0      | 0      | 0      | 0      | 0.149  | 0.053  | -1.491 | 0.6637 |
| hsa-miR-106a-3p   | 1.15   | 5.89   | 0      | 0.57   | 0      | 0      | 0.28   | 0      | 0      | 0      | 0      | 0.53   | 0      | 0      | 5.89   | 4.71   | 1.33   | 0.6    | 0      | 0      | 0.789  | 1.306  | 0.7271 | 0.6638 |
| hsa-miR-144-5p    | 34.02  | 83.11  | 6.83   | 45.63  | 76.05  | 43.04  | 28.4   | 6      | 25.46  | 11.3   | 15.82  | 38.71  | 23.3   | 4.35   | 55     | 54.83  | 98.65  | 69.37  | 52.01  | 22.04  | 35.984 | 43.408 | 0.2706 | 0.6646 |
| hsa-let-7g-3p     | 1.91   | 4.85   | 0      | 0.57   | 0      | 0      | 3.12   | 6.4    | 0      | 0      | 5.93   | 2.12   | 0      | 0      | 0      | 2.82   | 2.21   | 1.64   | 1.08   | 0      | 1.685  | 1.58   | -0.093 | 0.6648 |
| hsa-miR-194-3p    | 0.38   | 1.39   | 0      | 0.57   | 0      | 0.98   | 0      | 2      | 0      | 0      | 0      | 1.06   | 0      | 0      | 0      | 1.18   | 0.88   | 2.39   | 1.43   | 0      | 0.532  | 0.694  | 0.3835 | 0.6648 |
| hsa-miR-6810-5p   | 0      | 0      | 0      | 0.29   | 0      | 0      | 0.85   | 2      | 0      | 0      | 0      | 0      | 0      | 0      | 0      | 0.47   | 0      | 0.3    | 0.36   | 0.3    | 0.314  | 0.143  | -1.135 | 0.665  |
| hsa-miR-335-3p    | 40.52  | 16.62  | 0      | 13.49  | 11.48  | 13.21  | 11.07  | 0      | 6.21   | 5.9    | 1.98   | 9.55   | 1.79   | 1.24   | 6.88   | 3.29   | 28.76  | 27.81  | 15.06  | 0.3    | 11.85  | 9.666  | -0.294 | 0.6654 |
| hsa-miR-4683      | 1.15   | 0.35   | 0      | 0.86   | 0      | 1.96   | 1.14   | 0.8    | 1.24   | 1.47   | 0      | 1.59   | 1.79   | 1.24   | 0      | 1.18   | 3.54   | 1.2    | 1.43   | 0      | 0.897  | 1.197  | 0.4162 | 0.6664 |
| hsa-miR-4741      | 3.06   | 0.69   | 14.26  | 0.29   | 1.43   | 2.93   | 1.42   | 4.4    | 0      | 3.93   | 0      | 3.18   | 4.18   | 10.56  | 7.86   | 0.94   | 2.21   | 2.09   | 3.23   | 9.23   | 3.241  | 4.348  | 0.4239 | 0.6665 |
| hsa-miR-502-3p    | 175.84 | 224.04 | 183.59 | 140.91 | 341.52 | 164.34 | 207.01 | 259.42 | 135.36 | 183.31 | 415.37 | 251.35 | 250.32 | 214.93 | 221.98 | 337.7  | 207.04 | 293.79 | 139.88 | 159.05 | 201.53 | 249.14 | 0.3059 | 0.6703 |
| hsa-miR-125b-1-3p | 8.03   | 1.04   | 3.56   | 2.3    | 21.52  | 7.83   | 7.1    | 2      | 7.45   | 3.44   | 75.16  | 13.26  | 5.97   | 3.11   | 1.96   | 4.71   | 3.98   | 5.08   | 1.79   | 2.98   | 6.427  | 11.8   | 0.8766 | 0.6712 |
| hsa-miR-6741-3p   | 8.41   | 0.35   | 1.49   | 6.89   | 1.43   | 2.45   | 2.84   | 0      | 2.48   | 0.49   | 0      | 2.12   | 0.6    | 0      | 0.98   | 2.12   | 2.21   | 5.08   | 16.5   | 0      | 2.683  | 2.961  | 0.1422 | 0.6717 |
| hsa-miR-3620-3p   | 0.76   | 0      | 0      | 0.29   | 0      | 0      | 0      | 0      | 0      | 0      | 0      | 0      | 0      | 0      | 0      | 0      | 0      | 0.15   | 0.36   | 0      | 0.105  | 0.051  | -1.042 | 0.6718 |
| hsa-miR-21-3p     | 10.7   | 12.47  | 16.93  | 7.46   | 8.61   | 7.34   | 9.37   | 13.59  | 4.35   | 7.37   | 17.8   | 10.61  | 11.35  | 8.08   | 3.93   | 13.18  | 17.7   | 7.48   | 4.66   | 6.25   | 9.819  | 10.104 | 0.0413 | 0.6725 |
| hsa-miR-432-5p    | 103.6  | 62.68  | 2.38   | 29.56  | 40.18  | 81.19  | 82.92  | 7.59   | 122.32 | 258.5  | 393.61 | 49.85  | 40.03  | 52.8   | 101.17 | 54.13  | 77.86  | 68.03  | 228.83 | 137.01 | 79.092 | 120.33 | 0.6054 | 0.6727 |
| hsa-miR-4697-5p   | 0      | 0      | 1.78   | 0      | 0      | 0      | 0      | 0      | 0      | 0      | 0      | 0      | 0.6    | 0      | 0      | 0      | 0      | 0      | 0      | 3.28   | 0.178  | 0.388  | 1.1242 | 0.6733 |
| hsa-miR-659-5p    | 6.5    | 7.27   | 35.95  | 7.46   | 10.04  | 2.93   | 11.64  | 32.78  | 10.56  | 4.91   | 17.8   | 17.5   | 22.7   | 16.15  | 6.88   | 14.12  | 4.87   | 12.71  | 2.51   | 12.81  | 13.004 | 12.805 | -0.022 | 0.6737 |

|                  |        |        |        |        |        |        |        |        |        |        |        |        |        |        |        |        |        |        |        |        |        |        |        |        |
|------------------|--------|--------|--------|--------|--------|--------|--------|--------|--------|--------|--------|--------|--------|--------|--------|--------|--------|--------|--------|--------|--------|--------|--------|--------|
| hsa-miR-2115-3p  | 3.82   | 6.93   | 0      | 0.57   | 2.87   | 0.98   | 1.99   | 1.2    | 2.48   | 0.49   | 0      | 6.89   | 3.58   | 0      | 0      | 3.06   | 7.52   | 1.79   | 1.79   | 2.08   | 2.133  | 2.671  | 0.3245 | 0.6756 |
| hsa-miR-3936     | 0      | 0      | 0      | 0      | 0      | 0.49   | 0.57   | 0      | 0      | 0      | 5.93   | 0      | 0      | 0      | 0      | 0      | 0.88   | 0      | 0      | 0      | 0.106  | 0.681  | 2.6836 | 0.6762 |
| hsa-miR-6803-5p  | 0      | 0      | 0      | 0      | 0      | 0      | 0      | 0.4    | 0      | 0      | 0      | 0      | 0      | 0      | 0      | 0.24   | 0      | 0      | 0      | 0.89   | 0.04   | 0.113  | 1.4983 | 0.6764 |
| hsa-miR-7702     | 0.38   | 0      | 0      | 0      | 0      | 0      | 0      | 0      | 0      | 0      | 0      | 0.53   | 0      | 0      | 0.98   | 0      | 0      | 0      | 0      | 0      | 0.038  | 0.151  | 1.9905 | 0.6769 |
| hsa-miR-4791     | 0.38   | 0      | 0      | 0      | 0      | 0      | 0      | 0      | 0      | 0      | 0      | 0      | 0      | 0      | 0      | 0.24   | 0      | 0.75   | 0      | 0      | 0.038  | 0.099  | 1.3814 | 0.6769 |
| hsa-miR-6891-5p  | 0      | 0      | 0      | 0      | 0      | 0      | 1.14   | 0      | 0.62   | 1.47   | 0      | 0      | 0      | 0      | 5.89   | 0      | 0.88   | 0.6    | 0      | 0      | 0.323  | 0.737  | 1.1901 | 0.6771 |
| hsa-miR-3166     | 0.38   | 0      | 0      | 0      | 0      | 0      | 0      | 0      | 0      | 0      | 0      | 0      | 0      | 0      | 0      | 0.24   | 0.88   | 0      | 0      | 0      | 0.038  | 0.112  | 1.5594 | 0.6773 |
| hsa-miR-181a-5p  | 5941.3 | 6299.5 | 4305.7 | 4665.8 | 3883   | 4889.1 | 5822.4 | 6529   | 3572.7 | 2197.7 | 5000.3 | 6843.8 | 4040.9 | 1702.1 | 2414.3 | 7303.3 | 6249.2 | 6752.3 | 2657   | 5539.2 | 4810.6 | 4850.2 | 0.0118 | 0.6776 |
| hsa-miR-6832-5p  | 0      | 0      | 0      | 0      | 0      | 0      | 0      | 2.4    | 0      | 0      | 0      | 0      | 0      | 0      | 0      | 0      | 0.88   | 0      | 0      | 0      | 0.24   | 0.088  | -1.448 | 0.6781 |
| hsa-miR-181d-5p  | 65.75  | 58.52  | 48.72  | 23.82  | 54.53  | 45.98  | 36.35  | 64.75  | 31.67  | 15.73  | 13.85  | 84.84  | 61.53  | 55.29  | 53.04  | 39.77  | 71.22  | 78.94  | 24.03  | 45.87  | 44.582 | 52.838 | 0.2451 | 0.6784 |
| hsa-miR-363-5p   | 11.09  | 1.73   | 0      | 13.49  | 27.26  | 9.78   | 13.63  | 8.79   | 9.93   | 16.71  | 11.87  | 13.79  | 7.17   | 3.73   | 9.82   | 9.88   | 7.08   | 8.37   | 7.53   | 29.49  | 11.241 | 10.873 | -0.048 | 0.6787 |
| hsa-miR-186-5p   | 2328   | 4886.4 | 2254.2 | 2866.4 | 1644.5 | 1947.1 | 3760.2 | 11281  | 3877.6 | 1915.2 | 593.39 | 4819.2 | 9180.5 | 1521.9 | 1646.2 | 5645.6 | 3279.4 | 2851.2 | 1487   | 1281.9 | 3676.1 | 3230.6 | -0.186 | 0.6806 |
| hsa-miR-100-5p   | 566.14 | 621.57 | 193.1  | 287.56 | 585.47 | 760.55 | 416.29 | 304.18 | 391.17 | 399.05 | 945.47 | 539.82 | 383.54 | 255.93 | 316.28 | 899.91 | 572.45 | 1350.5 | 168.93 | 554.88 | 452.51 | 598.78 | 0.4041 | 0.6808 |
| hsa-miR-500b-5p  | 2.3    | 6.24   | 3.56   | 0.58   | 0      | 2.94   | 2.28   | 0      | 0      | 0      | 0      | 2.12   | 4.78   | 1.24   | 1.96   | 1.88   | 0      | 2.1    | 0      | 0      | 1.79   | 1.408  | -0.346 | 0.6833 |
| hsa-miR-6734-3p  | 0      | 0.69   | 0      | 0.29   | 0      | 0      | 0      | 0      | 0      | 0      | 0      | 0      | 0      | 0      | 0      | 0      | 0      | 0.45   | 0      | 0      | 0.098  | 0.045  | -1.123 | 0.6834 |
| hsa-miR-26b-5p   | 1437.3 | 1620.6 | 42.48  | 1176.9 | 332.91 | 1037.9 | 1083   | 92.73  | 482.45 | 142.03 | 132.52 | 773.15 | 341.72 | 34.79  | 143.4  | 805.78 | 1545.7 | 1706.8 | 908.13 | 134.03 | 744.84 | 652.61 | -0.191 | 0.6837 |
| hsa-miR-4433b-3p | 105.51 | 132.28 | 13.37  | 25.54  | 60.27  | 48.42  | 46.29  | 225.44 | 29.8   | 52.09  | 185.93 | 56.21  | 29.87  | 82.62  | 167.96 | 48.01  | 36.72  | 46.95  | 45.19  | 338.35 | 73.901 | 103.78 | 0.4899 | 0.6848 |
| hsa-miR-338-3p   | 1.15   | 0.69   | 0      | 0.57   | 0      | 0.49   | 0.28   | 3.6    | 0      | 0      | 0      | 0      | 2.99   | 0      | 0.98   | 0      | 0.44   | 0.6    | 0      | 5.36   | 0.678  | 1.037  | 0.6131 | 0.6851 |
| hsa-miR-4516     | 0.38   | 0.35   | 7.72   | 0      | 1.43   | 2.93   | 1.14   | 19.59  | 1.24   | 0      | 5.93   | 0.53   | 1.19   | 5.59   | 0.98   | 3.06   | 0.44   | 2.69   | 1.43   | 10.13  | 3.478  | 3.197  | -0.122 | 0.6851 |
| hsa-miR-7853-5p  | 0.38   | 0      | 0      | 0      | 0      | 0      | 0      | 0      | 0      | 0      | 0      | 1.06   | 0      | 0      | 0      | 0      | 0      | 0.45   | 0      | 0      | 0.038  | 0.151  | 1.9905 | 0.6853 |

|                  |        |        |        |        |        |        |        |       |        |        |        |        |        |        |        |        |        |        |        |        |        |        |        |        |
|------------------|--------|--------|--------|--------|--------|--------|--------|-------|--------|--------|--------|--------|--------|--------|--------|--------|--------|--------|--------|--------|--------|--------|--------|--------|
| hsa-miR-190a-3p  | 0      | 0      | 0      | 0      | 0      | 0.98   | 0.28   | 0     | 0      | 0      | 0      | 0      | 0      | 0      | 0      | 0.24   | 0      | 0      | 0      | 0      | 0.126  | 0.024  | -2.392 | 0.6855 |
| hsa-miR-372-3p   | 0      | 1.04   | 0      | 6.03   | 0      | 0.98   | 1.99   | 0.4   | 0      | 0      | 7.91   | 3.18   | 0      | 0      | 2.95   | 0.24   | 0.44   | 0.15   | 0      | 10.42  | 1.044  | 2.529  | 1.2764 | 0.6861 |
| hsa-miR-4646-5p  | 0      | 0.69   | 4.16   | 0.57   | 0      | 0      | 0.85   | 5.6   | 0.62   | 1.47   | 9.89   | 1.59   | 4.78   | 4.97   | 0.98   | 0.94   | 0.44   | 0.9    | 0.36   | 0      | 1.396  | 2.485  | 0.8319 | 0.6869 |
| hsa-miR-769-5p   | 135.32 | 134.7  | 326.48 | 51.94  | 565.38 | 65.05  | 96.55  | 569.2 | 93.14  | 107.13 | 1244.1 | 186.13 | 222.24 | 302.52 | 480.31 | 129.9  | 117.68 | 175.68 | 24.75  | 291.88 | 214.49 | 317.52 | 0.566  | 0.6871 |
| hsa-miR-1295a    | 1.53   | 0      | 0      | 0.29   | 1.43   | 0.98   | 0      | 0     | 0      | 0      | 0      | 0.53   | 0      | 0      | 0      | 0.47   | 0.88   | 0.3    | 0      | 0      | 0.423  | 0.218  | -0.956 | 0.6874 |
| hsa-miR-129-5p   | 74.92  | 22.86  | 166.96 | 36.16  | 149.24 | 102.72 | 63.04  | 83.94 | 103.08 | 100.26 | 122.64 | 80.6   | 52.58  | 140.38 | 153.22 | 47.06  | 90.24  | 83.42  | 55.96  | 98.88  | 90.318 | 92.498 | 0.0344 | 0.6881 |
| hsa-miR-561-5p   | 0      | 0      | 0      | 0      | 0      | 0.49   | 0.85   | 0     | 0      | 0      | 0      | 0      | 0      | 0      | 0      | 0.24   | 0      | 0      | 0      | 0      | 0.134  | 0.024  | -2.481 | 0.6884 |
| hsa-miR-4686     | 1.15   | 1.04   | 0      | 0.57   | 0      | 0      | 1.42   | 0     | 1.24   | 0      | 0      | 2.12   | 0      | 0      | 0      | 0.94   | 0      | 0.6    | 0.36   | 0      | 0.542  | 0.402  | -0.431 | 0.6886 |
| hsa-miR-6838-5p  | 0.76   | 0.35   | 0      | 0      | 0      | 0      | 0      | 0     | 0      | 0      | 0      | 0      | 0      | 0      | 0      | 0.47   | 0      | 0      | 0      | 0      | 0.111  | 0.047  | -1.24  | 0.6896 |
| hsa-miR-4435     | 6.5    | 1.04   | 2.67   | 4.02   | 5.74   | 3.42   | 6.53   | 2.8   | 1.24   | 3.44   | 11.87  | 3.71   | 2.39   | 1.24   | 4.91   | 2.12   | 3.54   | 4.19   | 1.08   | 8.04   | 3.74   | 4.309  | 0.2043 | 0.69   |
| hsa-miR-3065-5p  | 1.91   | 0.35   | 0      | 0.57   | 0      | 0      | 0.57   | 0     | 0      | 0      | 0      | 0      | 0      | 0      | 0      | 0.71   | 1.77   | 0      | 0.36   | 2.98   | 0.34   | 0.582  | 0.7755 | 0.6903 |
| hsa-miR-3622a-5p | 0.76   | 0      | 0.3    | 0.57   | 0      | 0.98   | 1.14   | 0     | 0      | 1.97   | 5.93   | 0      | 0      | 0      | 0      | 0.47   | 0.88   | 0.45   | 0.36   | 0      | 0.572  | 0.809  | 0.5001 | 0.6906 |
| hsa-miR-340-3p   | 52.37  | 15.93  | 0      | 12.91  | 0      | 22.5   | 11.07  | 0     | 8.69   | 1.47   | 5.93   | 16.97  | 0      | 0.62   | 0.98   | 5.88   | 61.93  | 42.46  | 30.13  | 3.87   | 12.494 | 16.877 | 0.4338 | 0.6906 |
| hsa-miR-378g     | 14.14  | 9.35   | 88.23  | 6.89   | 116.23 | 20.54  | 11.07  | 75.95 | 10.56  | 24.08  | 195.82 | 24.92  | 29.87  | 113.06 | 50.09  | 20.94  | 14.16  | 25.42  | 4.3    | 68.8   | 37.704 | 54.738 | 0.5378 | 0.691  |
| hsa-miR-382-5p   | 231.27 | 122.24 | 250.73 | 59.41  | 101.88 | 124.72 | 149.93 | 57.96 | 158.33 | 522.4  | 729.87 | 161.2  | 127.25 | 284.5  | 280.92 | 130.61 | 145.1  | 180.01 | 233.13 | 361.28 | 177.89 | 263.39 | 0.5662 | 0.691  |
| hsa-miR-4748     | 0      | 0      | 0      | 0      | 0      | 0      | 0      | 0     | 2.48   | 0.98   | 0      | 0      | 0      | 0      | 0      | 0      | 0      | 0.75   | 1.08   | 0      | 0.346  | 0.183  | -0.919 | 0.6916 |
| hsa-miR-19a-3p   | 154.06 | 219.54 | 5.94   | 118.24 | 14.35  | 107.11 | 130.62 | 47.17 | 153.36 | 43.25  | 37.58  | 155.9  | 271.23 | 9.32   | 43.22  | 187.8  | 308.79 | 79.54  | 123.38 | 33.36  | 99.364 | 125.01 | 0.3313 | 0.6919 |
| hsa-miR-7976     | 21.79  | 17.66  | 54.07  | 28.7   | 66.01  | 23.48  | 36.35  | 71.55 | 54.64  | 40.79  | 15.82  | 27.57  | 40.62  | 26.09  | 60.9   | 65.66  | 30.08  | 66.98  | 19.37  | 42.89  | 41.504 | 39.598 | -0.068 | 0.6922 |
| hsa-miR-7851-3p  | 2.29   | 0      | 4.46   | 0      | 10.04  | 0.98   | 0.28   | 0.8   | 0      | 0      | 0      | 1.06   | 0      | 4.97   | 0.98   | 0      | 0      | 0.45   | 1.43   | 2.98   | 1.885  | 1.187  | -0.667 | 0.6924 |
| hsa-miR-5680     | 1.15   | 0.35   | 0      | 0      | 0      | 0      | 0      | 0     | 0      | 0      | 0      | 0      | 0      | 0      | 0      | 0      | 0      | 0.3    | 0      | 0      | 0.15   | 0.03   | -2.322 | 0.6925 |

|                 |        |        |        |        |        |        |        |        |        |        |        |        |        |        |        |        |        |        |        |        |        |        |        |        |
|-----------------|--------|--------|--------|--------|--------|--------|--------|--------|--------|--------|--------|--------|--------|--------|--------|--------|--------|--------|--------|--------|--------|--------|--------|--------|
| hsa-miR-1285-5p | 2.68   | 1.04   | 0      | 2.3    | 8.61   | 3.42   | 2.56   | 4.4    | 1.24   | 3.44   | 15.82  | 2.12   | 4.18   | 0      | 4.91   | 3.29   | 3.98   | 2.24   | 3.23   | 3.28   | 2.969  | 4.305  | 0.536  | 0.6929 |
| hsa-miR-618     | 6.5    | 8.31   | 8.32   | 4.3    | 33     | 2.93   | 3.69   | 0.8    | 6.21   | 2.95   | 83.07  | 6.36   | 0.6    | 0      | 0      | 5.41   | 1.77   | 9.27   | 1.08   | 0      | 7.701  | 10.756 | 0.482  | 0.6959 |
| hsa-miR-6803-3p | 0      | 0.35   | 0      | 1.43   | 0      | 0.98   | 1.14   | 0      | 0.62   | 0      | 0      | 1.59   | 0      | 0      | 0      | 0      | 1.33   | 1.2    | 2.51   | 0      | 0.452  | 0.663  | 0.5527 | 0.6961 |
| hsa-miR-4687-5p | 0.76   | 0      | 0      | 0      | 0      | 0.49   | 0      | 0      | 0      | 0      | 0      | 0      | 0      | 0      | 0      | 0      | 0      | 0.6    | 0      | 0      | 0.125  | 0.06   | -1.059 | 0.6966 |
| hsa-miR-551b-5p | 0      | 0.35   | 0.59   | 0      | 0      | 0.49   | 1.42   | 0      | 0      | 1.97   | 0      | 0      | 0      | 1.86   | 0.98   | 0      | 0      | 0      | 0.72   | 0      | 0.482  | 0.356  | -0.437 | 0.6968 |
| hsa-miR-6087    | 0.76   | 0      | 13.96  | 1.72   | 18.65  | 3.42   | 0.85   | 6.8    | 1.86   | 6.39   | 3.96   | 3.71   | 4.18   | 8.08   | 3.93   | 1.18   | 0      | 6.88   | 0.72   | 15.79  | 5.441  | 4.843  | -0.168 | 0.6975 |
| hsa-miR-6767-3p | 0      | 0      | 0      | 0      | 0      | 0.98   | 0.28   | 0      | 0      | 0      | 0      | 0      | 0      | 0      | 0      | 0      | 0      | 0      | 0.36   | 0      | 0.126  | 0.036  | -1.807 | 0.6976 |
| hsa-miR-6882-5p | 3.06   | 0.69   | 1.78   | 0.57   | 1.43   | 0.49   | 0.85   | 0      | 0.62   | 2.46   | 0      | 0.53   | 0.6    | 3.73   | 0      | 0.94   | 3.1    | 2.24   | 3.23   | 0      | 1.195  | 1.437  | 0.266  | 0.6998 |
| hsa-miR-939-3p  | 0      | 0      | 0.89   | 0      | 0      | 0      | 0      | 1.6    | 0      | 0      | 0      | 0      | 0      | 0      | 0      | 0      | 0      | 1.2    | 0      | 0      | 0.249  | 0.12   | -1.053 | 0.6999 |
| hsa-miR-30d-3p  | 4.97   | 6.93   | 0      | 3.73   | 1.43   | 5.87   | 3.41   | 5.2    | 3.1    | 2.95   | 0      | 7.42   | 4.78   | 5.59   | 2.95   | 5.65   | 4.42   | 6.43   | 0.72   | 11.32  | 3.759  | 4.928  | 0.3907 | 0.7    |
| hsa-miR-676-3p  | 0.76   | 0      | 0      | 0      | 0      | 0.98   | 0      | 0      | 0      | 0      | 0      | 0.53   | 0      | 0      | 0      | 0.94   | 0      | 0      | 1.08   | 0      | 0.174  | 0.255  | 0.5514 | 0.7014 |
| hsa-miR-500a-3p | 176.23 | 211.23 | 217.75 | 144.93 | 383.14 | 179.5  | 196.22 | 265.01 | 158.95 | 202.47 | 591.41 | 260.9  | 262.27 | 286.37 | 238.68 | 309.23 | 214.12 | 278.54 | 116.92 | 161.13 | 213.54 | 271.96 | 0.3489 | 0.7027 |
| hsa-miR-328-3p  | 639.16 | 112.2  | 115.56 | 332.62 | 266.91 | 546.82 | 265.5  | 237.03 | 253.95 | 426.08 | 288.78 | 335.67 | 187.59 | 121.13 | 264.22 | 142.61 | 418.94 | 552.45 | 891.63 | 565    | 319.58 | 376.8  | 0.2376 | 0.7034 |
| hsa-miR-452-5p  | 26.76  | 9      | 163.39 | 12.34  | 14.35  | 46.95  | 19.59  | 64.35  | 12.42  | 40.3   | 215.6  | 21.21  | 65.12  | 22.98  | 52.06  | 30.12  | 44.24  | 14.95  | 9.68   | 33.66  | 40.945 | 50.962 | 0.3157 | 0.7037 |
| hsa-miR-943     | 2.29   | 0      | 0      | 0.57   | 0      | 0      | 0.57   | 0      | 0      | 0      | 0      | 0.53   | 0      | 0      | 0.98   | 0      | 0.44   | 0.15   | 0.36   | 0      | 0.343  | 0.246  | -0.48  | 0.7037 |
| hsa-miR-1343-3p | 6.88   | 0      | 0.89   | 2.58   | 1.43   | 3.91   | 0.57   | 6.4    | 1.86   | 1.97   | 0      | 2.65   | 2.99   | 1.24   | 2.95   | 1.41   | 4.87   | 1.35   | 3.23   | 1.79   | 2.649  | 2.248  | -0.237 | 0.7039 |
| hsa-miR-4707-5p | 0.38   | 0      | 0      | 0      | 0      | 1.47   | 0      | 2.8    | 0      | 0      | 0      | 0.53   | 0      | 0      | 2.95   | 0      | 0      | 0      | 0      | 0      | 0.465  | 0.348  | -0.418 | 0.7039 |
| hsa-miR-371b-5p | 0.76   | 2.77   | 0      | 0.57   | 0      | 0.49   | 1.14   | 0      | 0.62   | 0      | 13.85  | 0      | 0      | 0      | 0      | 0      | 1.33   | 1.05   | 1.79   | 0      | 0.635  | 1.802  | 1.5048 | 0.7043 |
| hsa-miR-6765-5p | 0      | 0      | 1.49   | 0      | 0      | 0      | 0.28   | 0.4    | 0      | 0      | 0      | 0      | 0.6    | 0      | 0.98   | 0.24   | 0      | 0.3    | 0      | 1.79   | 0.217  | 0.391  | 0.8495 | 0.7054 |
| hsa-miR-3202    | 0.38   | 1.04   | 0      | 0.29   | 0      | 0.49   | 0      | 0      | 0      | 1.47   | 0      | 0.53   | 0      | 0      | 0      | 0.94   | 0.44   | 0.6    | 0      | 0      | 0.367  | 0.251  | -0.548 | 0.7074 |

|                  |        |        |        |        |        |        |        |        |        |        |        |        |        |        |        |        |        |        |        |        |        |        |        |        |
|------------------|--------|--------|--------|--------|--------|--------|--------|--------|--------|--------|--------|--------|--------|--------|--------|--------|--------|--------|--------|--------|--------|--------|--------|--------|
| hsa-miR-5588-5p  | 1.53   | 0      | 0      | 0      | 0      | 0      | 0      | 0      | 0      | 0.98   | 0      | 0      | 0      | 0      | 0      | 0      | 1.33   | 0      | 0      | 0      | 0.251  | 0.133  | -0.916 | 0.7083 |
| hsa-miR-1306-5p  | 12.23  | 2.77   | 0      | 13.2   | 0      | 12.72  | 3.41   | 3.2    | 6.83   | 6.88   | 0      | 6.89   | 3.58   | 0.62   | 0.98   | 6.35   | 6.64   | 16.45  | 25.11  | 6.85   | 6.124  | 7.347  | 0.2627 | 0.7086 |
| hsa-miR-6503-5p  | 0.38   | 1.04   | 0      | 0      | 0      | 0      | 1.42   | 0      | 1.24   | 0.49   | 0      | 0      | 1.19   | 0      | 2.95   | 0.94   | 0.44   | 1.2    | 0.36   | 0      | 0.457  | 0.708  | 0.6316 | 0.7095 |
| hsa-miR-320d     | 85.63  | 52.63  | 1388.2 | 45.06  | 198.03 | 129.61 | 104.78 | 467.27 | 68.3   | 130.72 | 625.04 | 154.31 | 179.82 | 543.54 | 381.1  | 129.9  | 91.13  | 272.86 | 25.82  | 484.89 | 267.02 | 288.84 | 0.1133 | 0.7097 |
| hsa-miR-487a-3p  | 0      | 0      | 0      | 0      | 0      | 0.49   | 0      | 0      | 1.24   | 0      | 0      | 0      | 0      | 0      | 0      | 0      | 0.44   | 0.6    | 1.43   | 0      | 0.173  | 0.247  | 0.5137 | 0.71   |
| hsa-miR-4665-5p  | 8.03   | 0.69   | 95.06  | 5.74   | 45.92  | 11.25  | 9.65   | 55.56  | 11.18  | 75.19  | 59.34  | 13.26  | 21.51  | 131.07 | 99.2   | 2.12   | 9.73   | 12.71  | 6.81   | 103.95 | 31.827 | 45.97  | 0.5304 | 0.7143 |
| hsa-miR-221-5p   | 33.26  | 33.24  | 5.05   | 10.04  | 22.96  | 14.67  | 17.89  | 0.8    | 14.28  | 13.76  | 69.23  | 20.68  | 16.13  | 0.62   | 8.84   | 11.06  | 55.3   | 34.39  | 14.35  | 9.53   | 16.595 | 24.013 | 0.5331 | 0.7152 |
| hsa-miR-4687-3p  | 0.38   | 0.35   | 0      | 0      | 2.87   | 2.93   | 0.28   | 1.2    | 0      | 0      | 0      | 0.53   | 1.19   | 1.24   | 1.96   | 0.94   | 0.44   | 0      | 0      | 3.87   | 0.801  | 1.017  | 0.3444 | 0.7152 |
| hsa-miR-4491     | 0.38   | 0      | 0      | 0      | 0      | 0.49   | 0.28   | 2      | 0      | 0.49   | 3.96   | 0      | 0      | 0      | 0      | 0      | 0      | 1.05   | 0      | 0      | 0.364  | 0.501  | 0.4609 | 0.7179 |
| hsa-miR-605-5p   | 0.38   | 0.69   | 0      | 0.29   | 0      | 0.98   | 0.57   | 0      | 0.62   | 0      | 0      | 0      | 0      | 1.86   | 0      | 0      | 0      | 0.75   | 0      | 0      | 0.353  | 0.261  | -0.436 | 0.7185 |
| hsa-miR-20a-5p   | 982.06 | 818.26 | 15.45  | 507.97 | 687.35 | 500.35 | 627.27 | 27.18  | 304.25 | 203.95 | 81.1   | 537.7  | 510.79 | 36.03  | 259.31 | 772.36 | 1570.5 | 689.1  | 860.43 | 55.1   | 467.41 | 537.24 | 0.2009 | 0.7187 |
| hsa-miR-654-3p   | 42.81  | 52.63  | 2.08   | 12.91  | 14.35  | 24.94  | 29.25  | 1.2    | 42.22  | 30.96  | 63.29  | 23.33  | 8.36   | 1.24   | 7.86   | 23.06  | 29.64  | 93.45  | 63.48  | 26.21  | 25.335 | 33.992 | 0.4241 | 0.7195 |
| hsa-miR-598-5p   | 0      | 0      | 0      | 0.57   | 0      | 0      | 1.42   | 0      | 0      | 0      | 0      | 0.53   | 0      | 0.62   | 0      | 0      | 0.88   | 0.15   | 1.08   | 0      | 0.199  | 0.326  | 0.7121 | 0.7206 |
| hsa-miR-503-5p   | 45.49  | 62.33  | 12.48  | 51.08  | 51.66  | 54.29  | 47.99  | 3.6    | 36.63  | 12.78  | 92.96  | 37.12  | 32.26  | 3.73   | 15.72  | 88.49  | 88.48  | 39.02  | 43.04  | 58.38  | 37.833 | 49.92  | 0.4    | 0.723  |
| hsa-miR-4659b-3p | 4.59   | 1.73   | 0      | 1.72   | 1.43   | 1.47   | 1.42   | 0.4    | 3.1    | 0      | 7.91   | 1.59   | 0      | 0      | 0      | 2.12   | 3.1    | 5.23   | 1.79   | 3.28   | 1.586  | 2.502  | 0.6577 | 0.7231 |
| hsa-miR-500a-5p  | 2.3    | 8.32   | 3.56   | 1.14   | 0      | 2.94   | 3.4    | 0      | 1.24   | 0      | 0      | 4.24   | 4.78   | 1.24   | 5.9    | 2.36   | 0      | 2.1    | 0      | 0      | 2.29   | 2.062  | -0.151 | 0.7235 |
| hsa-miR-1290     | 67.28  | 53.67  | 68.03  | 30.99  | 205.2  | 78.75  | 77.52  | 49.56  | 39.12  | 234.91 | 288.78 | 98.63  | 45.4   | 84.48  | 75.63  | 83.54  | 115.02 | 128.73 | 71.02  | 242.14 | 90.503 | 123.34 | 0.4466 | 0.7242 |
| hsa-miR-4660     | 3.06   | 2.08   | 0      | 4.88   | 4.3    | 3.42   | 2.84   | 0      | 0.62   | 5.9    | 1.98   | 3.71   | 9.56   | 0      | 0      | 3.77   | 6.19   | 1.79   | 2.87   | 5.06   | 2.71   | 3.493  | 0.3662 | 0.7257 |
| hsa-miR-1226-3p  | 0.76   | 1.04   | 0      | 0.29   | 0      | 2.93   | 0.85   | 0      | 1.86   | 0      | 0      | 0      | 0.6    | 0      | 0      | 0.24   | 0      | 0.75   | 6.46   | 0      | 0.773  | 0.805  | 0.0585 | 0.7265 |
| hsa-miR-6772-3p  | 0.76   | 0      | 0      | 1.15   | 0      | 0      | 0      | 0      | 0.62   | 1.47   | 1.98   | 1.59   | 0      | 0      | 0      | 0.24   | 1.33   | 0.75   | 1.43   | 0      | 0.4    | 0.732  | 0.8718 | 0.7266 |

|                 |        |        |        |        |        |        |        |        |        |        |        |        |        |        |        |        |        |        |        |        |        |        |        |        |
|-----------------|--------|--------|--------|--------|--------|--------|--------|--------|--------|--------|--------|--------|--------|--------|--------|--------|--------|--------|--------|--------|--------|--------|--------|--------|
| hsa-miR-4637    | 1.15   | 0      | 0      | 0.86   | 0      | 0      | 0      | 0      | 1.24   | 0      | 0      | 0      | 0      | 0      | 0      | 0.71   | 1.33   | 0.3    | 0      | 0      | 0.325  | 0.234  | -0.474 | 0.727  |
| hsa-miR-3158-5p | 0      | 0.35   | 0      | 0.57   | 0      | 0      | 0      | 0      | 0      | 0.49   | 0      | 0      | 0      | 0      | 0      | 0.24   | 0.44   | 0      | 0      | 0      | 0.141  | 0.068  | -1.052 | 0.7272 |
| hsa-miR-6514-3p | 0      | 0.35   | 0      | 0.29   | 0      | 0      | 0      | 0      | 0      | 0      | 0      | 0      | 0      | 0      | 0      | 0.24   | 0      | 0.75   | 0.36   | 0      | 0.064  | 0.135  | 1.0768 | 0.7273 |
| hsa-miR-196a-5p | 0      | 1.39   | 0      | 4.02   | 1.43   | 1.47   | 1.99   | 0      | 0      | 0      | 0      | 0.53   | 0      | 3.73   | 1.96   | 0.94   | 1.33   | 0.6    | 0.36   | 0      | 1.03   | 0.945  | -0.124 | 0.7275 |
| hsa-miR-7109-3p | 0      | 0      | 0      | 0.29   | 0      | 0      | 0      | 0      | 0      | 0      | 0      | 0      | 0      | 0      | 0      | 0      | 1.33   | 0      | 0      | 0      | 0.029  | 0.133  | 2.1973 | 0.7286 |
| hsa-miR-6862-3p | 0      | 0      | 0      | 0      | 0      | 0      | 1.14   | 0      | 0      | 0      | 0      | 0      | 0      | 0      | 0      | 0.24   | 0      | 0      | 0      | 0      | 0.114  | 0.024  | -2.248 | 0.7286 |
| hsa-miR-3691-5p | 3.06   | 1.39   | 4.75   | 2.01   | 8.61   | 1.96   | 5.4    | 5.6    | 3.1    | 7.86   | 5.93   | 3.71   | 5.97   | 1.86   | 11.79  | 3.77   | 1.77   | 3.59   | 3.59   | 14     | 4.374  | 5.598  | 0.356  | 0.7291 |
| hsa-miR-628-5p  | 0.76   | 2.08   | 0      | 0.86   | 0      | 0.49   | 0.57   | 0      | 0      | 0.49   | 0      | 1.06   | 0.6    | 0      | 0      | 0.71   | 1.77   | 0.75   | 1.79   | 0      | 0.525  | 0.668  | 0.3475 | 0.7292 |
| hsa-miR-193a-5p | 938.86 | 116.7  | 5304.5 | 521.46 | 5046.8 | 1273.1 | 711.89 | 1670.8 | 710.94 | 2516.7 | 6659.8 | 1581.8 | 1482.2 | 3097.2 | 2473.2 | 546.91 | 708.27 | 819.63 | 827.79 | 2508.4 | 1881.2 | 2070.5 | 0.1384 | 0.73   |
| hsa-miR-15b-3p  | 54.28  | 132.97 | 1.49   | 64.57  | 127.71 | 45.98  | 40.32  | 3.2    | 55.26  | 27.03  | 15.82  | 37.65  | 20.31  | 0.62   | 51.08  | 102.61 | 121.66 | 50.98  | 58.82  | 8.04   | 55.281 | 46.759 | -0.242 | 0.7307 |
| hsa-miR-671-5p  | 11.47  | 6.58   | 82.88  | 5.45   | 61.7   | 4.4    | 8.52   | 41.97  | 9.31   | 14.25  | 124.61 | 11.14  | 34.65  | 68.33  | 82.51  | 5.88   | 5.75   | 5.98   | 3.23   | 19.66  | 24.653 | 36.174 | 0.5532 | 0.7307 |
| hsa-miR-3918    | 0      | 0      | 0      | 0.57   | 0      | 1.96   | 0.57   | 1.2    | 3.1    | 2.46   | 0      | 3.18   | 0      | 4.35   | 2.95   | 0.47   | 0.44   | 0.3    | 2.15   | 0      | 0.986  | 1.384  | 0.4892 | 0.7307 |
| hsa-miR-495-3p  | 58.87  | 99.38  | 22.87  | 20.95  | 24.39  | 64.56  | 43.45  | 3.2    | 54.64  | 60.94  | 128.57 | 51.97  | 23.9   | 11.18  | 12.77  | 46.6   | 77.42  | 50.24  | 61.33  | 25.91  | 45.325 | 48.989 | 0.1122 | 0.7327 |
| hsa-miR-4708-3p | 0.38   | 0      | 0      | 0      | 0      | 0      | 0      | 0      | 0      | 0      | 0      | 1.59   | 0      | 0      | 0      | 0      | 0      | 0      | 0      | 0      | 0.038  | 0.159  | 2.065  | 0.7334 |
| hsa-miR-3199    | 1.91   | 1.73   | 0      | 1.15   | 2.87   | 1.96   | 1.99   | 1.6    | 3.1    | 1.97   | 0      | 3.18   | 1.79   | 1.24   | 3.93   | 2.12   | 0.88   | 1.35   | 0.72   | 8.34   | 1.828  | 2.355  | 0.3655 | 0.7339 |
| hsa-miR-3161    | 1.53   | 0      | 0      | 0      | 0      | 0      | 0      | 0      | 0      | 0      | 0      | 0      | 0      | 0      | 0      | 0      | 0      | 2.69   | 0      | 0      | 0.153  | 0.269  | 0.8141 | 0.7344 |
| hsa-miR-939-5p  | 10.32  | 6.58   | 54.07  | 13.2   | 31.57  | 11.74  | 10.22  | 159.09 | 31.05  | 39.81  | 19.78  | 20.68  | 38.83  | 57.77  | 117.87 | 12     | 12.39  | 9.12   | 23.67  | 31.27  | 36.765 | 34.338 | -0.099 | 0.7345 |
| hsa-miR-454-3p  | 4.2    | 9.35   | 0      | 2.01   | 0      | 2.93   | 1.42   | 2.4    | 1.24   | 0.98   | 0      | 1.59   | 0      | 0.62   | 2.95   | 4      | 7.52   | 14.5   | 1.79   | 0      | 2.453  | 3.297  | 0.4266 | 0.735  |
| hsa-miR-520a-5p | 0      | 0      | 0      | 0.86   | 0      | 0      | 0      | 0      | 0      | 0      | 0      | 0.53   | 0      | 0      | 0      | 0      | 0      | 0      | 0      | 0      | 0.086  | 0.053  | -0.698 | 0.7351 |
| hsa-miR-450b-5p | 5.35   | 12.12  | 0.3    | 0.86   | 5.74   | 7.83   | 4.26   | 0      | 1.24   | 0.98   | 1.98   | 3.71   | 0      | 2.48   | 16.7   | 4      | 15.04  | 1.5    | 4.3    | 0      | 3.868  | 4.971  | 0.3619 | 0.7355 |

|                 |        |        |        |        |        |        |        |        |        |        |        |        |        |        |        |        |        |        |        |        |        |        |        |        |
|-----------------|--------|--------|--------|--------|--------|--------|--------|--------|--------|--------|--------|--------|--------|--------|--------|--------|--------|--------|--------|--------|--------|--------|--------|--------|
| hsa-miR-4755-5p | 7.26   | 1.73   | 0      | 6.03   | 1.43   | 6.36   | 8.52   | 2.8    | 6.83   | 9.34   | 0      | 2.12   | 6.57   | 0      | 0      | 5.65   | 8.85   | 7.03   | 9.33   | 3.28   | 5.03   | 4.283  | -0.232 | 0.7357 |
| hsa-miR-628-3p  | 42.05  | 17.66  | 0      | 10.62  | 5.74   | 23.97  | 20.73  | 0.8    | 8.07   | 5.9    | 0      | 14.85  | 7.17   | 0      | 1.96   | 11.06  | 34.51  | 37.68  | 8.61   | 6.25   | 13.554 | 12.209 | -0.151 | 0.7383 |
| hsa-miR-106b-3p | 1550.1 | 1565.5 | 1356.7 | 1580.4 | 3982.1 | 1325   | 2191.6 | 2126.5 | 1678.3 | 1310.2 | 4553.3 | 2033.6 | 1740.9 | 1645.5 | 2190.4 | 2565.1 | 1380.7 | 2214.6 | 705.49 | 1211.3 | 1866.6 | 2024.1 | 0.1168 | 0.7392 |
| hsa-miR-4504    | 4.97   | 5.19   | 0      | 4.3    | 0      | 2.93   | 7.1    | 5.2    | 3.1    | 1.47   | 0      | 6.36   | 2.99   | 3.11   | 5.89   | 7.3    | 8.41   | 7.33   | 2.15   | 0      | 3.426  | 4.354  | 0.3458 | 0.7411 |
| hsa-miR-548an   | 0      | 0      | 0      | 0      | 0      | 0      | 0      | 1.6    | 0      | 0      | 0      | 0      | 0      | 0      | 0      | 0.47   | 0      | 0      | 0      | 0      | 0.16   | 0.047  | -1.767 | 0.7417 |
| hsa-miR-3925-5p | 0      | 0      | 0      | 0      | 0      | 0      | 0      | 0      | 1.24   | 0      | 0      | 0.53   | 0      | 0      | 0      | 0      | 0      | 0      | 0      | 0      | 0.124  | 0.053  | -1.226 | 0.7428 |
| hsa-miR-874-5p  | 0.38   | 0.35   | 0      | 0      | 0      | 0      | 0      | 0      | 0      | 0      | 3.96   | 0      | 0      | 0      | 0      | 0.24   | 0.44   | 0      | 0      | 0      | 0.073  | 0.464  | 2.6682 | 0.7429 |
| hsa-miR-6503-3p | 4.2    | 6.58   | 19.61  | 4.88   | 17.22  | 6.36   | 5.4    | 19.19  | 3.1    | 1.47   | 29.67  | 14.32  | 4.18   | 24.85  | 10.8   | 4.94   | 2.65   | 10.17  | 1.79   | 16.98  | 8.801  | 12.035 | 0.4515 | 0.7439 |
| hsa-miR-151a-5p | 56.96  | 24.24  | 6.83   | 17.22  | 10.04  | 24.94  | 39.47  | 16.39  | 11.8   | 11.3   | 39.56  | 28.1   | 8.96   | 13.04  | 8.84   | 18.36  | 48.66  | 73.26  | 11.84  | 43.19  | 21.919 | 29.381 | 0.4227 | 0.7475 |
| hsa-miR-548e-3p | 6.12   | 13.85  | 1.49   | 3.73   | 10.04  | 6.85   | 5.4    | 3.6    | 3.1    | 2.46   | 17.8   | 10.61  | 4.18   | 0      | 6.88   | 7.53   | 16.81  | 5.68   | 5.38   | 0      | 5.664  | 7.487  | 0.4026 | 0.7483 |
| hsa-miR-491-5p  | 2.29   | 3.46   | 22.58  | 1.72   | 12.91  | 2.93   | 2.27   | 41.17  | 3.1    | 1.47   | 23.74  | 4.24   | 16.73  | 21.74  | 35.36  | 2.82   | 6.64   | 4.49   | 0.72   | 8.64   | 9.39   | 12.512 | 0.4141 | 0.7485 |
| hsa-miR-188-5p  | 1.91   | 1.39   | 0      | 1.15   | 0      | 2.45   | 3.69   | 3.2    | 0.62   | 1.47   | 0      | 3.18   | 2.99   | 0      | 0      | 3.29   | 3.1    | 2.54   | 2.15   | 2.08   | 1.588  | 1.933  | 0.2836 | 0.7492 |
| hsa-miR-144-3p  | 181.2  | 250.71 | 118.23 | 267.19 | 33     | 189.28 | 223.76 | 1017.3 | 181.93 | 37.84  | 3.96   | 302.79 | 315.44 | 9.94   | 65.81  | 419.83 | 237.56 | 602.38 | 115.13 | 193.89 | 250.04 | 226.67 | -0.142 | 0.7492 |
| hsa-miR-1295b-2 | 0      | 0      | 0      | 0      | 2.87   | 0      | 0      | 0      | 0      | 0      | 0      | 0.53   | 0      | 0      | 0      | 0      | 0      | 0      | 0      | 0      | 0.287  | 0.053  | -2.437 | 0.7497 |
| hsa-miR-6877-5p | 18.35  | 4.5    | 110.81 | 13.78  | 76.05  | 21.03  | 15.33  | 65.95  | 11.18  | 53.08  | 108.79 | 29.17  | 44.21  | 94.42  | 124.74 | 16.24  | 12.39  | 19.89  | 16.86  | 55.1   | 39.006 | 52.181 | 0.4198 | 0.7503 |
| hsa-miR-1260b   | 108.57 | 41.55  | 24.06  | 66.01  | 90.4   | 84.13  | 37.48  | 41.57  | 50.91  | 42.26  | 49.45  | 44.01  | 5.38   | 34.17  | 79.56  | 40.71  | 57.95  | 138.6  | 79.62  | 200.74 | 58.694 | 73.019 | 0.3151 | 0.7512 |
| hsa-miR-105-5p  | 0.38   | 0      | 0.3    | 0      | 0      | 0.98   | 0      | 0      | 0      | 0      | 0      | 0      | 0      | 0      | 0.98   | 0      | 0      | 0      | 0      | 0      | 0.166  | 0.098  | -0.76  | 0.7513 |
| hsa-miR-6511a-2 | 7.26   | 2.77   | 0      | 6.89   | 0      | 3.91   | 3.12   | 1.2    | 3.1    | 2.95   | 0      | 3.71   | 2.39   | 0      | 0.98   | 3.06   | 6.19   | 4.49   | 14.35  | 0      | 3.12   | 3.517  | 0.1728 | 0.7516 |
| hsa-miR-4324    | 1.15   | 0      | 0      | 0.57   | 0      | 1.96   | 0.57   | 0      | 0      | 0.49   | 1.98   | 0      | 0.6    | 0      | 0      | 0.71   | 0.88   | 0.45   | 0.36   | 0      | 0.474  | 0.498  | 0.0713 | 0.7536 |
| hsa-miR-223-5p  | 1334.9 | 1537.1 | 33.27  | 443.11 | 845.2  | 924.4  | 791.69 | 61.96  | 684.24 | 411.34 | 7144.4 | 1127.9 | 290.94 | 42.24  | 319.22 | 438.42 | 1699.2 | 666.97 | 632.32 | 213.85 | 706.72 | 1257.5 | 0.8314 | 0.7546 |

|                  |        |        |        |        |        |        |        |        |        |        |        |        |        |        |        |        |        |        |        |        |        |        |        |        |
|------------------|--------|--------|--------|--------|--------|--------|--------|--------|--------|--------|--------|--------|--------|--------|--------|--------|--------|--------|--------|--------|--------|--------|--------|--------|
| hsa-miR-4742-3p  | 3.44   | 1.04   | 0      | 5.17   | 0      | 1.47   | 2.27   | 0      | 1.24   | 0.98   | 0      | 0.53   | 0.6    | 0      | 0      | 1.65   | 3.1    | 4.78   | 6.1    | 3.28   | 1.561  | 2.004  | 0.3604 | 0.7548 |
| hsa-miR-6513-3p  | 2.68   | 0.69   | 0.59   | 1.72   | 1.43   | 1.47   | 3.41   | 1.6    | 2.48   | 0      | 0      | 2.12   | 0.6    | 0      | 0      | 0.94   | 3.98   | 4.78   | 2.15   | 6.25   | 1.607  | 2.082  | 0.3736 | 0.7554 |
| hsa-miR-6763-5p  | 0      | 0.35   | 0.59   | 0.86   | 0      | 0      | 0      | 4.4    | 0      | 1.97   | 0      | 2.12   | 0.6    | 3.73   | 0.98   | 0.24   | 0.88   | 0.9    | 1.08   | 0      | 0.817  | 1.053  | 0.3661 | 0.7566 |
| hsa-miR-4777-3p  | 0      | 0      | 0      | 0      | 0      | 0.98   | 0      | 0      | 0      | 0      | 0      | 0.53   | 0      | 0      | 0      | 0.71   | 0      | 0.45   | 0      | 0      | 0.098  | 0.169  | 0.7862 | 0.757  |
| hsa-miR-548am-3p | 2.68   | 6.58   | 0.3    | 2.87   | 1.43   | 1.96   | 2.56   | 0.8    | 1.86   | 0.98   | 7.91   | 3.18   | 2.99   | 0      | 0      | 3.29   | 8.85   | 2.24   | 2.87   | 0      | 2.202  | 3.133  | 0.5087 | 0.7592 |
| hsa-miR-3920     | 0.76   | 0      | 0      | 0      | 0      | 0      | 0.28   | 0      | 0      | 0      | 0      | 1.06   | 0      | 0      | 0      | 0      | 0      | 0.75   | 0      | 0      | 0.104  | 0.181  | 0.7994 | 0.7601 |
| hsa-miR-6886-5p  | 0      | 0      | 0      | 0      | 0      | 0      | 0.57   | 1.2    | 0      | 0      | 0      | 0      | 0      | 0      | 0      | 0.47   | 0      | 0.15   | 0      | 0      | 0.177  | 0.062  | -1.513 | 0.7608 |
| hsa-miR-181c-3p  | 9.56   | 18.7   | 13.07  | 5.74   | 8.61   | 6.36   | 5.68   | 18.79  | 7.45   | 0.49   | 47.47  | 20.68  | 12.55  | 6.83   | 3.93   | 7.06   | 9.29   | 15.55  | 1.79   | 15.79  | 9.445  | 14.094 | 0.5775 | 0.7609 |
| hsa-miR-130a-3p  | 71.87  | 28.4   | 10.99  | 36.45  | 11.48  | 28.86  | 37.77  | 35.17  | 32.91  | 9.83   | 9.89   | 49.32  | 37.64  | 3.73   | 4.91   | 50.6   | 69.9   | 27.96  | 22.95  | 7.45   | 30.373 | 28.435 | -0.095 | 0.7611 |
| hsa-miR-1297     | 0      | 0      | 0      | 0.57   | 0      | 0      | 0.85   | 0      | 0      | 0      | 0      | 0      | 0      | 0      | 0      | 0.24   | 0      | 0.75   | 0      | 0      | 0.142  | 0.099  | -0.52  | 0.7622 |
| hsa-miR-518f-5p  | 0.76   | 0      | 0      | 0.86   | 0      | 0      | 0      | 0      | 0      | 0      | 0      | 0      | 0      | 0      | 0      | 0.47   | 0.44   | 0      | 0      | 0      | 0.162  | 0.091  | -0.832 | 0.7625 |
| hsa-miR-4659a-2  | 6.12   | 6.93   | 0      | 5.74   | 1.43   | 3.42   | 4.26   | 0.4    | 3.1    | 0      | 0      | 4.77   | 1.19   | 0      | 0      | 6.35   | 7.52   | 7.33   | 9.68   | 0      | 3.14   | 3.684  | 0.2305 | 0.7626 |
| hsa-miR-4521     | 0.38   | 1.39   | 0      | 0      | 0      | 0.49   | 0.57   | 0      | 0.62   | 2.46   | 0      | 1.06   | 3.58   | 0      | 0      | 3.53   | 0      | 0      | 0      | 0      | 0.591  | 0.817  | 0.4672 | 0.7629 |
| hsa-miR-301b-3p  | 1.15   | 0.35   | 0      | 0.29   | 0      | 0      | 0.28   | 0      | 0.62   | 1.97   | 0      | 0.53   | 0.6    | 0      | 0      | 0.94   | 1.33   | 0.75   | 0      | 0      | 0.466  | 0.415  | -0.167 | 0.7644 |
| hsa-miR-6739-5p  | 0      | 0.35   | 0      | 0      | 1.43   | 0      | 0.28   | 0      | 0      | 0      | 0      | 0      | 0      | 0.62   | 0.98   | 0.24   | 0      | 0.45   | 0      | 0      | 0.206  | 0.229  | 0.1527 | 0.7647 |
| hsa-miR-6743-3p  | 0.76   | 0      | 0      | 1.15   | 0      | 0.49   | 0      | 0      | 0      | 0      | 0      | 1.06   | 0      | 0      | 0      | 0.47   | 0      | 0      | 1.79   | 0      | 0.24   | 0.332  | 0.4681 | 0.7658 |
| hsa-miR-23c      | 0.76   | 18.01  | 0      | 3.73   | 1.43   | 0      | 3.12   | 0.8    | 3.73   | 0.49   | 1.98   | 7.42   | 1.19   | 0      | 0      | 8.71   | 7.96   | 0.75   | 1.08   | 0      | 3.207  | 2.909  | -0.141 | 0.767  |
| hsa-miR-330-3p   | 272.56 | 78.95  | 152.99 | 106.19 | 150.67 | 237.7  | 154.19 | 92.73  | 124.8  | 160.7  | 419.33 | 254    | 108.73 | 113.68 | 179.75 | 61.19  | 275.17 | 206.92 | 114.41 | 326.14 | 153.15 | 205.93 | 0.4272 | 0.7675 |
| hsa-miR-192-5p   | 1463.3 | 1672.2 | 318.76 | 1044.1 | 942.78 | 1978.9 | 1609.8 | 935.73 | 969.24 | 859.04 | 1208.5 | 1588.7 | 1352   | 319.29 | 545.14 | 1637.7 | 1394.4 | 1625.9 | 1123.3 | 1097.3 | 1179.4 | 1189.2 | 0.012  | 0.7676 |
| hsa-miR-128-3p   | 4804.4 | 798.87 | 134.28 | 2045.6 | 726.1  | 4198.5 | 2585.5 | 308.98 | 1268.5 | 1081.7 | 1107.7 | 2085.1 | 673.28 | 100.63 | 492.1  | 1659.8 | 4393.4 | 5132.8 | 3799   | 2215.6 | 1795.2 | 2165.9 | 0.2708 | 0.7711 |

|                 |        |        |        |        |        |        |        |        |        |        |        |        |        |        |        |        |        |        |        |        |        |        |        |        |
|-----------------|--------|--------|--------|--------|--------|--------|--------|--------|--------|--------|--------|--------|--------|--------|--------|--------|--------|--------|--------|--------|--------|--------|--------|--------|
| hsa-miR-3656    | 17.97  | 9      | 120.61 | 28.7   | 243.95 | 23.48  | 16.47  | 306.98 | 46.57  | 25.56  | 92.96  | 32.35  | 37.64  | 284.5  | 156.17 | 42.12  | 7.52   | 60.25  | 8.97   | 296.95 | 83.929 | 101.94 | 0.2805 | 0.7733 |
| hsa-miR-3128    | 0.38   | 1.73   | 0      | 0.57   | 0      | 0      | 0      | 0      | 0      | 0.49   | 0      | 0      | 1.79   | 0      | 0      | 0.71   | 0.44   | 0.3    | 1.08   | 0      | 0.317  | 0.432  | 0.4465 | 0.7739 |
| hsa-miR-4485-3p | 0      | 0      | 0      | 0.57   | 0      | 0      | 0.57   | 0      | 0      | 0      | 0      | 0      | 0      | 0      | 0      | 0.24   | 0.44   | 0.75   | 0.36   | 0      | 0.114  | 0.179  | 0.6509 | 0.7744 |
| hsa-miR-7706    | 293.58 | 26.32  | 146.16 | 334.34 | 619.91 | 277.81 | 270.9  | 181.07 | 219.8  | 436.89 | 506.36 | 339.91 | 140.39 | 296.31 | 423.34 | 152.26 | 194.65 | 242.81 | 243.89 | 475.95 | 280.68 | 301.59 | 0.1037 | 0.7746 |
| hsa-miR-4487    | 1.52   | 0      | 6.54   | 1.14   | 2.87   | 0.49   | 0      | 0      | 0      | 0      | 0      | 0      | 0.6    | 12.42  | 0      | 1.42   | 0.88   | 0.75   | 0      | 0      | 1.256  | 1.607  | 0.3555 | 0.7756 |
| hsa-miR-2110    | 669.36 | 119.81 | 1512.4 | 677.29 | 1406.3 | 829.03 | 640.9  | 1980.2 | 829.53 | 1865.5 | 1244.1 | 923.22 | 1844.8 | 1820.7 | 2441.8 | 522.2  | 479.55 | 669.37 | 749.24 | 2379.2 | 1053   | 1307.4 | 0.3122 | 0.7758 |
| hsa-miR-642a-3p | 27.14  | 10.04  | 4.16   | 2.58   | 24.39  | 11.25  | 7.95   | 4.4    | 9.93   | 10.81  | 35.6   | 7.95   | 4.78   | 0      | 8.84   | 5.18   | 23.89  | 17.94  | 0.36   | 25.02  | 11.265 | 12.956 | 0.2018 | 0.7759 |
| hsa-miR-200a-3p | 40.14  | 36.01  | 2.97   | 29.85  | 8.61   | 78.26  | 36.63  | 29.98  | 27.32  | 3.44   | 9.89   | 42.42  | 25.09  | 6.83   | 36.34  | 50.83  | 39.82  | 32.89  | 27.26  | 6.25   | 29.321 | 27.762 | -0.079 | 0.7763 |
| hsa-miR-3150a-2 | 0.76   | 0      | 2.08   | 0.29   | 1.43   | 0      | 0.28   | 5.6    | 0.62   | 1.47   | 1.98   | 1.59   | 1.19   | 3.73   | 0      | 0.94   | 0      | 0.6    | 0      | 7.74   | 1.253  | 1.777  | 0.5041 | 0.7766 |
| hsa-miR-758-3p  | 4.97   | 4.5    | 0      | 1.15   | 0      | 0      | 2.56   | 0      | 8.07   | 4.42   | 0      | 4.77   | 5.38   | 0.62   | 5.89   | 0.94   | 3.54   | 5.68   | 3.23   | 4.17   | 2.567  | 3.422  | 0.4148 | 0.7774 |
| hsa-miR-3163    | 1.91   | 0.69   | 0      | 1.43   | 0      | 0.49   | 1.42   | 0      | 0      | 0      | 0      | 1.59   | 0      | 0      | 0      | 1.65   | 1.77   | 2.24   | 0.72   | 0      | 0.594  | 0.797  | 0.4241 | 0.7779 |
| hsa-let-7b-3p   | 35.17  | 53.67  | 2.67   | 28.41  | 14.35  | 47.93  | 27.26  | 1.6    | 21.11  | 17.69  | 13.85  | 22.8   | 3.58   | 0.62   | 17.68  | 25.65  | 61.93  | 32.74  | 46.63  | 0      | 24.986 | 22.548 | -0.148 | 0.7782 |
| hsa-miR-99a-3p  | 0      | 0.35   | 0      | 0      | 0      | 0      | 0.85   | 0      | 0      | 0      | 0      | 1.06   | 0      | 0      | 0      | 0.47   | 0.44   | 0.3    | 0      | 0      | 0.12   | 0.227  | 0.9197 | 0.7796 |
| hsa-miR-4767    | 0      | 0.35   | 0.59   | 0      | 0      | 0      | 0      | 0.8    | 0      | 0.49   | 0      | 0.53   | 0      | 0      | 0      | 0      | 0      | 0.9    | 0      | 0      | 0.223  | 0.143  | -0.641 | 0.7796 |
| hsa-miR-185-3p  | 141.44 | 73.07  | 289.35 | 111.35 | 318.57 | 91.95  | 132.61 | 395.72 | 120.46 | 113.52 | 150.33 | 161.2  | 262.86 | 179.52 | 278.95 | 162.85 | 103.52 | 208.42 | 68.15  | 199.85 | 178.8  | 177.57 | -0.01  | 0.7801 |
| hsa-miR-125b-5p | 500.4  | 206.04 | 76.64  | 208.07 | 535.25 | 738.54 | 265.22 | 75.94  | 187.52 | 410.35 | 506.36 | 418.39 | 204.32 | 96.9   | 320.21 | 370.88 | 572.46 | 567.85 | 474.15 | 279.08 | 320.4  | 381.06 | 0.2502 | 0.7806 |
| hsa-miR-6842-5p | 8.03   | 5.54   | 8.91   | 6.03   | 0      | 5.87   | 3.69   | 15.19  | 8.69   | 5.9    | 37.58  | 8.48   | 6.57   | 3.11   | 3.93   | 3.06   | 9.29   | 6.13   | 4.3    | 8.04   | 6.785  | 9.049  | 0.4154 | 0.7818 |
| hsa-let-7g-5p   | 7759   | 9246.8 | 160.12 | 5244.4 | 6577.9 | 5054.9 | 5454.9 | 574.79 | 2533.3 | 1147   | 5621.4 | 4017.9 | 2513.9 | 399.42 | 1151.2 | 5007.4 | 8382.8 | 10245  | 3953.2 | 2141.8 | 4375.3 | 4343.4 | -0.011 | 0.7828 |
| hsa-miR-3200-5p | 4.97   | 6.93   | 21.09  | 11.48  | 2.87   | 11.74  | 16.75  | 1.6    | 8.07   | 3.93   | 0      | 12.73  | 15.53  | 10.56  | 0.98   | 12.24  | 8.85   | 7.03   | 10.4   | 3.87   | 8.943  | 8.219  | -0.122 | 0.7834 |
| hsa-miR-940     | 0      | 0.35   | 0      | 0.29   | 4.3    | 0      | 0      | 0      | 0      | 0      | 0      | 0.53   | 0      | 0      | 2.95   | 0      | 0.44   | 0      | 0      | 1.79   | 0.494  | 0.571  | 0.209  | 0.7838 |

|                 |       |       |       |       |        |       |       |        |       |        |        |        |        |        |        |       |       |       |       |        |        |        |        |        |
|-----------------|-------|-------|-------|-------|--------|-------|-------|--------|-------|--------|--------|--------|--------|--------|--------|-------|-------|-------|-------|--------|--------|--------|--------|--------|
| hsa-miR-6750-5p | 6.88  | 2.77  | 38.32 | 7.17  | 12.91  | 5.38  | 3.69  | 33.18  | 8.07  | 15.73  | 25.71  | 10.08  | 20.31  | 27.33  | 20.63  | 5.88  | 1.33  | 5.68  | 0.72  | 29.49  | 13.41  | 14.716 | 0.1341 | 0.7845 |
| hsa-miR-6802-5p | 0.38  | 0     | 1.49  | 0     | 0      | 0.49  | 0.57  | 1.2    | 1.24  | 0      | 0      | 0      | 0.6    | 0.62   | 0      | 0.24  | 0     | 0.9   | 0     | 2.68   | 0.537  | 0.504  | -0.092 | 0.7852 |
| hsa-miR-664b-5p | 0.76  | 2.77  | 3.27  | 1.72  | 1.43   | 1.96  | 2.84  | 0      | 3.1   | 2.95   | 5.93   | 1.59   | 0      | 9.94   | 2.95   | 2.59  | 1.33  | 2.39  | 0.72  | 2.98   | 2.08   | 3.042  | 0.5484 | 0.7859 |
| hsa-miR-6852-3p | 0.76  | 0     | 0     | 0.57  | 1.43   | 0     | 0.57  | 0      | 0     | 1.47   | 0      | 0      | 0      | 1.24   | 2.95   | 0     | 0     | 0.3   | 0     | 0      | 0.48   | 0.449  | -0.096 | 0.7861 |
| hsa-miR-5003-3p | 1.15  | 0.35  | 0     | 0.57  | 0      | 0.49  | 1.7   | 0      | 1.86  | 0      | 0      | 0.53   | 0      | 0      | 0      | 2.35  | 1.33  | 0.45  | 2.51  | 0      | 0.612  | 0.717  | 0.2284 | 0.7877 |
| hsa-miR-190b    | 3.82  | 9     | 3.86  | 2.3   | 8.61   | 0     | 5.68  | 2      | 4.35  | 8.35   | 0      | 2.65   | 0.6    | 0      | 9.82   | 7.3   | 7.96  | 7.77  | 3.95  | 4.17   | 4.797  | 4.422  | -0.117 | 0.7892 |
| hsa-miR-576-5p  | 15.29 | 39.13 | 0     | 9.76  | 0      | 19.56 | 15.05 | 0      | 13.04 | 5.9    | 1.98   | 8.48   | 4.78   | 0      | 0      | 16    | 30.97 | 29.6  | 12.91 | 3.28   | 11.773 | 10.8   | -0.125 | 0.7899 |
| hsa-miR-32-5p   | 38.61 | 63.37 | 0     | 21.24 | 1.43   | 22.01 | 26.98 | 0.4    | 14.28 | 0.49   | 3.96   | 23.33  | 4.18   | 0.62   | 3.93   | 40.01 | 49.11 | 53.67 | 35.87 | 14.3   | 18.881 | 22.898 | 0.2783 | 0.791  |
| hsa-miR-1278    | 1.91  | 2.77  | 0     | 2.01  | 1.43   | 3.91  | 3.12  | 0      | 3.1   | 0.49   | 0      | 1.06   | 0      | 0      | 3.93   | 2.59  | 7.96  | 3.89  | 3.59  | 0      | 1.874  | 2.302  | 0.2968 | 0.7923 |
| hsa-miR-935     | 0.38  | 0     | 0     | 0.29  | 0      | 0.49  | 0     | 0      | 0.62  | 0      | 0      | 0.53   | 0.6    | 0      | 0      | 0.24  | 1.33  | 0.3   | 0     | 0      | 0.178  | 0.3    | 0.7531 | 0.7927 |
| hsa-miR-490-3p  | 0.38  | 0     | 7.72  | 0     | 10.04  | 0.49  | 0.57  | 3.6    | 0.62  | 1.47   | 0      | 0      | 5.38   | 3.73   | 4.91   | 0.94  | 1.77  | 0.75  | 0     | 2.08   | 2.489  | 1.956  | -0.348 | 0.7928 |
| hsa-miR-5006-3p | 0     | 0.35  | 0     | 0.29  | 1.43   | 0.49  | 0.57  | 0      | 0     | 0      | 0      | 0      | 0      | 0      | 0      | 0.24  | 0.44  | 0.9   | 0     | 0      | 0.313  | 0.158  | -0.986 | 0.7939 |
| hsa-miR-6859-3p | 0.76  | 0.35  | 2.67  | 2.01  | 1.43   | 0     | 0.28  | 0      | 0.62  | 0.49   | 0      | 0.53   | 0.6    | 0      | 0      | 0.71  | 2.65  | 0     | 2.15  | 0      | 0.861  | 0.664  | -0.375 | 0.7942 |
| hsa-miR-3661    | 1.15  | 0.35  | 0     | 0.29  | 8.61   | 0     | 0.85  | 1.2    | 0     | 3.44   | 3.96   | 1.06   | 1.19   | 2.48   | 3.93   | 0     | 0.88  | 0.6   | 0     | 0      | 1.589  | 1.41   | -0.172 | 0.7943 |
| hsa-miR-541-3p  | 0.76  | 0.35  | 0     | 0.29  | 4.3    | 0.98  | 1.14  | 2.4    | 0     | 2.46   | 0      | 0      | 4.78   | 7.45   | 0      | 0     | 0.88  | 0     | 0.72  | 0      | 1.268  | 1.383  | 0.1252 | 0.7943 |
| hsa-miR-3160-3p | 0.76  | 0     | 0.59  | 0     | 0      | 0     | 0     | 0      | 0.62  | 0      | 0      | 0      | 0      | 0      | 0      | 0     | 0.44  | 0     | 0.72  | 0      | 0.197  | 0.116  | -0.764 | 0.7956 |
| hsa-miR-552-3p  | 0     | 0     | 0     | 0.29  | 0      | 0.98  | 0     | 0      | 0     | 0      | 0      | 1.06   | 0.6    | 0      | 0      | 0     | 0     | 0.75  | 0     | 0      | 0.127  | 0.241  | 0.9242 | 0.796  |
| hsa-miR-1298-5p | 0.38  | 0.69  | 0     | 0.29  | 0      | 1.96  | 3.12  | 8.79   | 0.62  | 0      | 1.98   | 2.12   | 0      | 1.24   | 7.86   | 1.41  | 3.54  | 4.19  | 0     | 0      | 1.585  | 2.234  | 0.4951 | 0.7979 |
| hsa-miR-378h    | 0.38  | 0.35  | 25.55 | 0.29  | 5.74   | 0.98  | 2.56  | 7.99   | 0     | 0.98   | 13.85  | 0.53   | 6.57   | 6.21   | 10.8   | 1.88  | 0     | 2.69  | 0.36  | 6.25   | 4.482  | 4.914  | 0.1328 | 0.8015 |
| hsa-miR-483-5p  | 20.64 | 24.24 | 284   | 19.8  | 551.03 | 34.24 | 37.48 | 323.77 | 36.01 | 168.56 | 642.84 | 106.59 | 120.68 | 337.93 | 182.69 | 27.53 | 22.56 | 36.33 | 38.38 | 136.11 | 149.98 | 165.16 | 0.1392 | 0.8022 |

|                  |        |        |        |        |        |        |        |        |        |        |        |        |        |       |        |        |        |        |        |        |        |        |        |        |
|------------------|--------|--------|--------|--------|--------|--------|--------|--------|--------|--------|--------|--------|--------|-------|--------|--------|--------|--------|--------|--------|--------|--------|--------|--------|
| hsa-miR-6505-3p  | 0.38   | 0.35   | 0      | 1.43   | 0      | 1.47   | 0.85   | 0      | 0.62   | 0.49   | 0      | 1.06   | 0      | 0     | 0      | 1.18   | 0.44   | 0.6    | 1.43   | 0      | 0.559  | 0.471  | -0.247 | 0.8027 |
| hsa-miR-7113-5p  | 1.53   | 0.69   | 0      | 0.86   | 4.3    | 0.49   | 0.28   | 3.2    | 0      | 0      | 0      | 0      | 0      | 0     | 2.95   | 0.24   | 0.44   | 1.35   | 0.36   | 3.87   | 1.135  | 0.921  | -0.301 | 0.8034 |
| hsa-miR-210-5p   | 0.38   | 0      | 0      | 0.29   | 0      | 0      | 0      | 1.6    | 0      | 0      | 0      | 0      | 0      | 0     | 0      | 0.24   | 0      | 0      | 0.72   | 0      | 0.227  | 0.096  | -1.242 | 0.8037 |
| hsa-miR-4474-3p  | 0      | 1.39   | 0      | 0.29   | 4.3    | 0.49   | 0.57   | 0      | 1.86   | 0      | 0      | 3.18   | 1.79   | 0     | 0      | 0.71   | 0      | 2.09   | 0      | 2.38   | 0.89   | 1.015  | 0.1896 | 0.8039 |
| hsa-miR-548av-5p | 8.41   | 6.93   | 5.35   | 3.16   | 5.74   | 1.96   | 6.82   | 7.19   | 5.59   | 5.9    | 0      | 8.48   | 5.97   | 3.73  | 11.79  | 8      | 3.98   | 3.14   | 4.66   | 4.76   | 5.705  | 5.451  | -0.066 | 0.8056 |
| hsa-miR-532-5p   | 1944.6 | 2019.2 | 1297.3 | 1966.4 | 4593.4 | 2152.1 | 3215.9 | 1708.8 | 2276.9 | 3050.4 | 4048.9 | 2889.5 | 2151.9 | 1325  | 2214.9 | 3312.3 | 2676.9 | 3782.5 | 1025.4 | 3104.7 | 2422.5 | 2653.2 | 0.1312 | 0.806  |
| hsa-miR-26a-1-3p | 0.38   | 0      | 0      | 0.57   | 0      | 0      | 0.28   | 0      | 0      | 0.98   | 0      | 0.53   | 0      | 0     | 0      | 0      | 0.44   | 0.9    | 0      | 0      | 0.221  | 0.187  | -0.241 | 0.8075 |
| hsa-miR-1247-5p  | 0.38   | 0      | 0      | 0.86   | 0      | 1.47   | 0      | 2      | 0.62   | 0.98   | 0      | 0.53   | 1.19   | 0     | 0      | 0.47   | 0      | 0.9    | 0      | 2.38   | 0.631  | 0.547  | -0.206 | 0.8081 |
| hsa-miR-5192     | 0      | 0      | 0      | 0.29   | 0      | 0      | 0      | 5.6    | 1.86   | 0.98   | 1.98   | 0.53   | 0      | 1.24  | 1.96   | 0.47   | 0      | 0.45   | 0      | 2.38   | 0.873  | 0.901  | 0.0455 | 0.8083 |
| hsa-miR-214-3p   | 29.05  | 17.66  | 27.03  | 5.45   | 27.26  | 38.64  | 12.21  | 3.2    | 4.35   | 6.88   | 134.5  | 23.33  | 13.74  | 11.8  | 20.63  | 16.94  | 25.22  | 14.65  | 3.95   | 8.34   | 17.173 | 27.31  | 0.6693 | 0.8095 |
| hsa-miR-4484     | 0      | 0      | 1.49   | 0      | 0      | 0      | 0      | 0      | 0      | 0      | 0      | 0      | 0      | 0     | 0      | 0      | 0      | 0.75   | 0      | 0      | 0.149  | 0.075  | -0.99  | 0.8101 |
| hsa-miR-374a-3p  | 4.59   | 5.89   | 0      | 4.59   | 0      | 3.91   | 4.26   | 0      | 2.48   | 0      | 0      | 4.24   | 0.6    | 0.62  | 0.98   | 3.06   | 7.52   | 7.18   | 1.08   | 0      | 2.572  | 2.528  | -0.025 | 0.8102 |
| hsa-miR-937-3p   | 0.76   | 0      | 2.08   | 1.15   | 2.87   | 0.49   | 1.7    | 4      | 0.62   | 1.97   | 0      | 0      | 0      | 0.62  | 1.96   | 0      | 0.44   | 2.84   | 2.51   | 5.06   | 1.564  | 1.343  | -0.22  | 0.8111 |
| hsa-miR-4479     | 1.53   | 1.04   | 10.69  | 1.43   | 1.43   | 0.49   | 1.42   | 4.8    | 1.24   | 0.49   | 0      | 2.12   | 2.39   | 9.94  | 7.86   | 2.12   | 0      | 3.74   | 0.72   | 2.08   | 2.456  | 3.097  | 0.3346 | 0.8113 |
| hsa-miR-17-3p    | 2.68   | 4.16   | 23.77  | 1.43   | 1.43   | 2.45   | 4.83   | 27.98  | 1.24   | 0      | 1.98   | 5.83   | 10.75  | 5.59  | 11.79  | 6.12   | 5.75   | 10.76  | 1.08   | 7.74   | 6.997  | 6.739  | -0.054 | 0.8122 |
| hsa-miR-4738-3p  | 16.06  | 4.85   | 63.87  | 15.5   | 53.09  | 17.12  | 15.05  | 13.99  | 6.21   | 36.37  | 77.14  | 26.51  | 31.66  | 52.18 | 63.84  | 11.06  | 8.41   | 12.56  | 11.12  | 25.02  | 24.211 | 31.95  | 0.4002 | 0.8123 |
| hsa-miR-6754-3p  | 0      | 0      | 0      | 0.29   | 0      | 0.49   | 0.28   | 0      | 0      | 0      | 0      | 0      | 0      | 0     | 0      | 0      | 0      | 0.15   | 1.43   | 0      | 0.106  | 0.158  | 0.5759 | 0.8128 |
| hsa-miR-431-3p   | 2.68   | 3.12   | 0      | 0.57   | 1.43   | 0.49   | 5.4    | 2.8    | 4.97   | 4.42   | 5.93   | 0      | 2.99   | 8.08  | 5.89   | 2.12   | 2.21   | 3.74   | 0      | 6.55   | 2.588  | 3.751  | 0.5354 | 0.8129 |
| hsa-miR-4661-5p  | 2.29   | 2.42   | 2.67   | 0.86   | 10.04  | 5.87   | 4.83   | 0      | 1.24   | 6.39   | 19.78  | 2.65   | 2.99   | 2.48  | 3.93   | 2.59   | 3.1    | 2.99   | 2.87   | 9.23   | 3.661  | 5.261  | 0.5231 | 0.8131 |
| hsa-miR-181c-5p  | 2.68   | 9.35   | 2.08   | 2.87   | 0      | 1.47   | 2.84   | 7.99   | 0.62   | 0      | 7.91   | 9.01   | 1.19   | 0     | 0      | 2.12   | 2.65   | 9.57   | 0.36   | 0.6    | 2.99   | 3.341  | 0.1601 | 0.8134 |

|                   |        |        |        |        |        |        |        |        |        |        |        |        |        |        |        |       |        |        |        |        |        |        |        |        |
|-------------------|--------|--------|--------|--------|--------|--------|--------|--------|--------|--------|--------|--------|--------|--------|--------|-------|--------|--------|--------|--------|--------|--------|--------|--------|
| hsa-miR-487b-3p   | 2.68   | 6.58   | 0.3    | 1.15   | 0      | 0.98   | 2.27   | 0      | 2.48   | 2.46   | 0      | 2.12   | 0.6    | 1.86   | 0      | 2.82  | 2.21   | 12.26  | 0.72   | 2.08   | 1.89   | 2.467  | 0.3844 | 0.8142 |
| hsa-miR-6854-3p   | 0      | 0      | 0      | 0      | 0      | 0      | 0      | 0      | 0      | 0.98   | 0      | 0      | 0      | 0      | 0.98   | 0     | 0      | 0.45   | 0.72   | 0      | 0.098  | 0.215  | 1.1335 | 0.8145 |
| hsa-miR-4743-5p   | 0      | 0.69   | 7.13   | 0.57   | 0      | 1.96   | 0      | 0      | 1.86   | 0.98   | 7.91   | 0.53   | 1.79   | 3.11   | 0      | 0.71  | 0.44   | 0.45   | 0.36   | 2.08   | 1.319  | 1.738  | 0.398  | 0.815  |
| hsa-miR-214-5p    | 12.61  | 15.24  | 5.05   | 5.74   | 15.78  | 30.32  | 15.33  | 13.19  | 4.35   | 0.98   | 37.58  | 22.27  | 30.47  | 2.48   | 0      | 27.77 | 22.56  | 6.28   | 1.08   | 1.79   | 11.859 | 15.228 | 0.3607 | 0.8159 |
| hsa-miR-18a-5p    | 14.53  | 15.24  | 5.05   | 9.18   | 0      | 3.91   | 13.35  | 5.6    | 15.52  | 0.49   | 0      | 18.03  | 12.55  | 0      | 0.98   | 16.94 | 16.37  | 28.56  | 6.1    | 2.08   | 8.287  | 10.161 | 0.2941 | 0.8176 |
| hsa-miR-335-5p    | 120.8  | 56.44  | 2.08   | 46.49  | 17.22  | 60.16  | 46.57  | 6.8    | 33.53  | 46.2   | 11.87  | 89.09  | 31.07  | 3.73   | 10.8   | 46.36 | 149.97 | 86.72  | 71.02  | 8.64   | 43.629 | 50.927 | 0.2231 | 0.8188 |
| hsa-miR-7-1-3p    | 3.06   | 13.16  | 0      | 3.16   | 0      | 1.47   | 1.14   | 0      | 3.73   | 0.98   | 0      | 3.71   | 4.78   | 0      | 0.98   | 5.88  | 4.42   | 3.44   | 1.43   | 0      | 2.67   | 2.464  | -0.116 | 0.8191 |
| hsa-miR-3680-3p   | 0      | 0.69   | 0      | 1.15   | 0      | 0.98   | 0.28   | 0      | 0      | 1.47   | 0      | 0.53   | 0      | 0      | 0      | 1.41  | 1.33   | 1.35   | 1.43   | 0      | 0.457  | 0.605  | 0.4047 | 0.8191 |
| hsa-miR-200c-3p   | 54.28  | 48.83  | 2.97   | 21.24  | 1.43   | 59.67  | 26.41  | 2.4    | 21.11  | 4.42   | 0      | 29.7   | 11.95  | 1.86   | 17.68  | 25.65 | 41.14  | 68.33  | 23.67  | 14.89  | 24.276 | 23.487 | -0.048 | 0.8195 |
| hsa-miR-3613-5p   | 16.06  | 19.39  | 0.3    | 9.18   | 4.3    | 21.03  | 12.49  | 1.2    | 3.73   | 5.41   | 3.96   | 4.77   | 0.6    | 0      | 0.98   | 13.41 | 19.47  | 38.57  | 22.6   | 2.68   | 9.309  | 10.704 | 0.2015 | 0.8195 |
| hsa-miR-4674      | 0      | 0      | 0      | 0      | 0      | 1.47   | 0      | 0      | 0      | 0      | 0      | 1.59   | 0      | 0      | 0      | 0.24  | 0      | 0.45   | 0      | 0      | 0.147  | 0.228  | 0.6332 | 0.821  |
| hsa-miR-200a-5p   | 2.68   | 2.42   | 0      | 1.43   | 0      | 1.47   | 0.57   | 0      | 0      | 0.49   | 7.91   | 0      | 1.79   | 0      | 0.98   | 1.88  | 0.44   | 1.94   | 1.08   | 0      | 0.906  | 1.602  | 0.8223 | 0.8213 |
| hsa-miR-1193      | 0      | 0      | 3.56   | 0      | 0      | 0      | 0      | 0      | 0      | 0      | 5.93   | 0      | 0      | 0      | 0      | 0     | 0.44   | 0      | 0      | 0      | 0.356  | 0.637  | 0.8394 | 0.8242 |
| hsa-miR-607       | 0.38   | 0.35   | 0      | 0.57   | 0      | 0      | 0      | 0      | 0      | 0      | 0      | 2.65   | 0      | 0      | 0      | 0     | 0      | 0      | 0      | 0      | 0.13   | 0.265  | 1.0275 | 0.8243 |
| hsa-miR-101-3p    | 5799.4 | 8214.8 | 733.16 | 6081.6 | 1572.7 | 6006.7 | 6426.6 | 916.15 | 5650.3 | 1054.6 | 553.82 | 5208.4 | 5147.3 | 337.93 | 1389.9 | 10877 | 7554.7 | 4235.1 | 4023.5 | 1043.9 | 4245.6 | 4037.2 | -0.073 | 0.825  |
| hsa-miR-125b-2-3p | 24.08  | 14.89  | 12.18  | 9.76   | 14.35  | 19.07  | 21.3   | 9.19   | 10.56  | 20.15  | 45.49  | 27.57  | 7.17   | 0      | 7.86   | 26.83 | 20.35  | 18.99  | 4.3    | 25.91  | 15.553 | 18.447 | 0.2462 | 0.8252 |
| hsa-miR-30c-3p    | 176.61 | 205.34 | 5.35   | 54.24  | 103.32 | 110.54 | 83.2   | 2.8    | 49.05  | 24.57  | 146.37 | 86.97  | 18.52  | 6.21   | 44.2   | 70.36 | 194.21 | 192.57 | 57.03  | 50.34  | 81.502 | 86.678 | 0.0888 | 0.8269 |
| hsa-miR-224-3p    | 0      | 0.35   | 0      | 0.29   | 0      | 0      | 0.85   | 0      | 0      | 0.49   | 0      | 1.06   | 1.19   | 0      | 0      | 0.24  | 0.88   | 0      | 0      | 0      | 0.198  | 0.337  | 0.7672 | 0.8291 |
| hsa-miR-574-3p    | 67.28  | 70.3   | 14.85  | 53.38  | 80.36  | 137.44 | 64.74  | 11.59  | 70.78  | 38.33  | 458.89 | 94.39  | 19.71  | 6.21   | 7.86   | 43.07 | 106.17 | 56.52  | 44.47  | 22.93  | 60.905 | 86.022 | 0.4981 | 0.8304 |
| hsa-miR-151b      | 70.33  | 31.86  | 11.29  | 22.96  | 14.34  | 30.82  | 55.94  | 26.78  | 15.53  | 14.74  | 45.49  | 32.87  | 14.34  | 16.15  | 8.84   | 26.6  | 61.49  | 99.42  | 16.14  | 53.91  | 29.459 | 37.525 | 0.3491 | 0.8315 |

|                   |        |        |        |        |        |        |        |        |        |        |        |        |        |        |        |        |        |        |        |        |        |        |        |        |
|-------------------|--------|--------|--------|--------|--------|--------|--------|--------|--------|--------|--------|--------|--------|--------|--------|--------|--------|--------|--------|--------|--------|--------|--------|--------|
| hsa-miR-550b-2-5p | 0.38   | 0.69   | 0      | 1.15   | 0      | 0      | 0.85   | 1.2    | 0      | 0.98   | 0      | 0      | 0      | 0      | 0      | 0.47   | 0      | 2.69   | 0.72   | 3.57   | 0.525  | 0.745  | 0.5049 | 0.8341 |
| hsa-miR-6806-3p   | 3.06   | 1.39   | 6.83   | 3.44   | 1.43   | 2.45   | 1.99   | 2.8    | 1.86   | 1.97   | 0      | 2.12   | 3.58   | 2.48   | 0      | 4.47   | 4.87   | 4.19   | 2.87   | 0.89   | 2.722  | 2.547  | -0.096 | 0.836  |
| hsa-miR-3617-5p   | 1.53   | 0      | 1.19   | 0.57   | 1.43   | 0.49   | 0.28   | 0      | 0      | 1.97   | 0      | 3.18   | 0      | 0      | 0      | 0.71   | 0.88   | 1.64   | 0      | 0      | 0.746  | 0.641  | -0.219 | 0.8363 |
| hsa-miR-516a-5p   | 1.15   | 0      | 0.3    | 1.43   | 0      | 0.49   | 0.57   | 0      | 0      | 0.98   | 0      | 2.12   | 2.39   | 0      | 0      | 0.47   | 2.21   | 0      | 0      | 0      | 0.492  | 0.719  | 0.5473 | 0.8369 |
| hsa-miR-6515-5p   | 3.82   | 1.39   | 53.18  | 1.72   | 10.04  | 3.42   | 6.53   | 21.18  | 3.1    | 2.95   | 37.58  | 2.12   | 7.17   | 45.35  | 29.47  | 2.12   | 7.08   | 6.43   | 0.36   | 12.81  | 10.733 | 15.049 | 0.4876 | 0.8372 |
| hsa-miR-3615      | 2601   | 498.65 | 2998   | 2743.3 | 3838.6 | 2357   | 2583.8 | 2412.3 | 2254.5 | 3370.8 | 4302.1 | 2728.8 | 2215.8 | 3428.3 | 3777.6 | 1956.6 | 1657.6 | 1978.6 | 2646.2 | 3084.1 | 2565.8 | 2777.6 | 0.1144 | 0.8378 |
| hsa-miR-421       | 59.25  | 57.83  | 0      | 35.59  | 14.35  | 41.57  | 47.71  | 4.4    | 42.84  | 18.18  | 0      | 56.21  | 23.9   | 0      | 0      | 39.54  | 84.94  | 50.09  | 35.15  | 12.21  | 32.172 | 30.204 | -0.091 | 0.8382 |
| hsa-miR-548a-3p   | 4.58   | 3.46   | 0      | 0      | 0      | 0.98   | 2.28   | 0      | 0      | 0      | 0      | 1.06   | 0      | 0      | 3.92   | 0.94   | 6.2    | 0.9    | 1.44   | 0      | 1.13   | 1.446  | 0.3557 | 0.8396 |
| hsa-miR-885-3p    | 1.91   | 2.42   | 0      | 2.01   | 11.48  | 3.91   | 4.54   | 0      | 0      | 3.93   | 17.8   | 4.77   | 1.19   | 2.48   | 0.98   | 1.18   | 0      | 0.6    | 3.95   | 1.19   | 3.02   | 3.414  | 0.1769 | 0.8412 |
| hsa-miR-548k      | 7.65   | 6.93   | 5.35   | 3.16   | 5.74   | 1.96   | 6.25   | 7.19   | 5.59   | 5.9    | 0      | 8.48   | 5.97   | 3.73   | 11.79  | 8      | 3.98   | 3.14   | 4.66   | 3.57   | 5.572  | 5.332  | -0.064 | 0.8414 |
| hsa-miR-33a-5p    | 0.38   | 1.04   | 0      | 0.86   | 0      | 0.49   | 0      | 4.4    | 0.62   | 0      | 0      | 2.12   | 0.6    | 0      | 0      | 0.94   | 0.44   | 1.2    | 1.08   | 0      | 0.779  | 0.638  | -0.288 | 0.8423 |
| hsa-miR-148a-5p   | 58.87  | 48.48  | 319.35 | 24.11  | 143.5  | 35.22  | 38.62  | 115.52 | 40.98  | 25.06  | 298.67 | 78.48  | 86.63  | 143.49 | 109.03 | 48.24  | 55.3   | 61.15  | 13.63  | 106.33 | 84.971 | 100.1  | 0.2363 | 0.8424 |
| hsa-miR-499a-5p   | 12.23  | 17.31  | 0      | 8.32   | 2.87   | 8.8    | 8.23   | 2.8    | 8.69   | 0.49   | 0      | 10.61  | 1.79   | 5.59   | 4.91   | 11.53  | 13.71  | 9.27   | 7.89   | 0      | 6.974  | 6.53   | -0.095 | 0.8442 |
| hsa-miR-6853-3p   | 0.38   | 0      | 0      | 0.29   | 0      | 0.49   | 0.57   | 0      | 0.62   | 0.49   | 0      | 0      | 0      | 2.48   | 0      | 0      | 0      | 0      | 0      | 0      | 0.284  | 0.248  | -0.196 | 0.8453 |
| hsa-miR-30b-3p    | 4.2    | 3.81   | 6.24   | 1.72   | 1.43   | 2.93   | 2.84   | 6      | 0      | 2.46   | 5.93   | 4.24   | 1.79   | 0      | 4.91   | 1.41   | 3.1    | 5.23   | 2.15   | 6.85   | 3.163  | 3.561  | 0.171  | 0.8454 |
| hsa-miR-4724-5p   | 3.44   | 0.69   | 1.19   | 0.57   | 4.3    | 0.98   | 0.85   | 3.6    | 0      | 3.44   | 27.69  | 1.59   | 0.6    | 0      | 0      | 0.71   | 1.33   | 0.45   | 0      | 1.49   | 1.906  | 3.386  | 0.829  | 0.8454 |
| hsa-miR-3135a     | 3.06   | 1.04   | 0      | 5.17   | 2.87   | 5.87   | 9.94   | 4.8    | 3.73   | 5.41   | 5.93   | 4.24   | 5.97   | 16.77  | 2.95   | 2.82   | 4.87   | 8.22   | 1.08   | 1.49   | 4.189  | 5.434  | 0.3754 | 0.848  |
| hsa-miR-98-3p     | 0.38   | 2.42   | 0      | 0.86   | 1.43   | 0      | 0      | 0      | 0      | 0      | 0      | 0      | 0      | 0      | 0      | 0.47   | 1.33   | 0.15   | 2.87   | 0      | 0.509  | 0.482  | -0.079 | 0.8486 |
| hsa-miR-340-5p    | 314.99 | 245.51 | 2.08   | 123.69 | 63.14  | 178.52 | 124.38 | 13.19  | 168.89 | 40.79  | 33.63  | 214.76 | 73.48  | 11.8   | 44.2   | 225.45 | 373.82 | 312.33 | 158.53 | 28.29  | 127.52 | 147.63 | 0.2113 | 0.8488 |
| hsa-miR-6762-3p   | 0      | 0.35   | 0      | 0.57   | 0      | 0      | 0.57   | 1.6    | 0      | 0      | 0      | 0      | 0      | 0      | 0      | 0.71   | 0      | 1.35   | 0      | 0      | 0.309  | 0.206  | -0.585 | 0.8491 |

|                  |        |        |        |        |        |        |        |        |        |        |        |        |        |        |        |        |        |        |        |        |        |        |        |        |
|------------------|--------|--------|--------|--------|--------|--------|--------|--------|--------|--------|--------|--------|--------|--------|--------|--------|--------|--------|--------|--------|--------|--------|--------|--------|
| hsa-miR-3192-5p  | 0.38   | 0.69   | 0      | 1.15   | 2.87   | 1.47   | 1.14   | 1.2    | 3.73   | 2.95   | 0      | 0.53   | 2.39   | 0      | 2.95   | 0.47   | 0.88   | 0.75   | 1.79   | 4.77   | 1.558  | 1.453  | -0.101 | 0.8514 |
| hsa-miR-25-5p    | 33.26  | 16.62  | 82.29  | 31.86  | 116.23 | 58.69  | 28.96  | 98.73  | 44.08  | 67.33  | 53.4   | 45.07  | 65.12  | 100.63 | 110.01 | 34.36  | 34.06  | 40.37  | 36.94  | 151.3  | 57.805 | 67.126 | 0.2157 | 0.8515 |
| hsa-miR-1273c    | 8.03   | 4.5    | 10.1   | 2.58   | 10.04  | 2.93   | 6.82   | 20.39  | 4.97   | 2.46   | 27.69  | 11.14  | 8.36   | 5.59   | 17.68  | 6.82   | 2.65   | 5.83   | 0.36   | 0      | 7.282  | 8.612  | 0.242  | 0.8518 |
| hsa-miR-3173-5p  | 8.41   | 2.08   | 2.38   | 5.45   | 4.3    | 13.21  | 5.68   | 1.2    | 9.31   | 6.39   | 0      | 2.12   | 1.79   | 1.86   | 0.98   | 3.06   | 10.17  | 6.88   | 17.93  | 5.06   | 5.841  | 4.985  | -0.229 | 0.8522 |
| hsa-miR-4999-5p  | 0.38   | 1.04   | 0      | 0.86   | 0      | 0.49   | 0.85   | 0      | 0      | 0      | 0      | 0.53   | 0      | 0      | 0      | 0.71   | 0.88   | 0.9    | 0      | 0      | 0.362  | 0.302  | -0.261 | 0.853  |
| hsa-miR-182-5p   | 873.49 | 790.56 | 18.72  | 679.87 | 414.71 | 653.44 | 408.9  | 89.54  | 368.2  | 130.23 | 166.15 | 562.63 | 197.15 | 45.97  | 74.65  | 588.33 | 1106   | 936.69 | 534.05 | 122.71 | 442.77 | 433.43 | -0.031 | 0.853  |
| hsa-miR-3911     | 0.76   | 0.35   | 2.38   | 0.86   | 0      | 0.98   | 0.28   | 2      | 1.24   | 0.98   | 5.93   | 0.53   | 0.6    | 3.73   | 0.98   | 0.94   | 0.44   | 0.45   | 0      | 0      | 0.983  | 1.36   | 0.4683 | 0.8536 |
| hsa-miR-643      | 1.15   | 1.39   | 0      | 0.29   | 0      | 0      | 0.28   | 0      | 0.62   | 0      | 0      | 0.53   | 0      | 0      | 0      | 0.24   | 1.33   | 0.6    | 0.36   | 0      | 0.373  | 0.306  | -0.286 | 0.8538 |
| hsa-miR-1180-3p  | 785.19 | 197.73 | 1027.9 | 926.11 | 1706.2 | 766.91 | 899.02 | 3163   | 1036.3 | 1272.4 | 686.35 | 921.62 | 1012   | 1070.3 | 1987   | 838.96 | 615.36 | 1540.6 | 1001.7 | 2400.3 | 1178.1 | 1207.4 | 0.0355 | 0.8555 |
| hsa-miR-3122     | 0.38   | 0.35   | 0      | 0.86   | 4.3    | 0.98   | 1.42   | 0.8    | 0.62   | 1.47   | 0      | 1.06   | 0      | 0.62   | 3.93   | 0.47   | 0      | 2.54   | 0      | 1.49   | 1.118  | 1.011  | -0.145 | 0.8556 |
| hsa-miR-20b-5p   | 114.68 | 174.87 | 13.67  | 112.5  | 81.79  | 61.14  | 142.55 | 20.39  | 77.61  | 46.2   | 1.98   | 125.15 | 145.17 | 21.74  | 33.4   | 148.26 | 215    | 79.24  | 117.64 | 30.68  | 84.54  | 91.826 | 0.1193 | 0.8557 |
| hsa-miR-29b-2-5p | 2.29   | 2.08   | 1.49   | 0      | 10.04  | 1.96   | 1.7    | 8.39   | 0.62   | 0      | 1.98   | 2.12   | 5.97   | 0      | 3.93   | 1.41   | 1.77   | 2.69   | 0.72   | 10.42  | 2.857  | 3.101  | 0.1182 | 0.8563 |
| hsa-miR-6128     | 0      | 0      | 1.19   | 0      | 1.43   | 0      | 0      | 1.6    | 0      | 0      | 1.98   | 0      | 0      | 0      | 0      | 0.47   | 0      | 0.15   | 0.36   | 0.89   | 0.422  | 0.385  | -0.132 | 0.8574 |
| hsa-miR-363-3p   | 1249.3 | 2532.7 | 373.71 | 1806.6 | 1261.4 | 1075.5 | 2552   | 2422.3 | 1695.7 | 555.82 | 395.59 | 2550.6 | 2814.4 | 556.58 | 621.75 | 2600.4 | 1816.9 | 2171.7 | 841.78 | 1094.3 | 1552.5 | 1546.4 | -0.006 | 0.8582 |
| hsa-miR-503-3p   | 0      | 1.04   | 0      | 0      | 0      | 0      | 0      | 0      | 0      | 0      | 5.93   | 0      | 0      | 0      | 0      | 0      | 0      | 0      | 0      | 0      | 0.104  | 0.593  | 2.5114 | 0.859  |
| hsa-miR-221-3p   | 2076.5 | 2042   | 452.73 | 1078.2 | 1313   | 1165   | 1518.3 | 1374.6 | 912.74 | 1715.6 | 1786.1 | 2421.8 | 1342.4 | 692.62 | 977.31 | 1413.9 | 2796.8 | 2088.1 | 640.57 | 807.15 | 1364.9 | 1496.7 | 0.133  | 0.8598 |
| hsa-miR-516b-5p  | 3.44   | 3.46   | 0.3    | 3.44   | 2.87   | 3.42   | 3.98   | 0      | 1.24   | 0      | 3.96   | 9.55   | 3.58   | 0      | 0      | 1.41   | 4.87   | 0.3    | 0      | 0      | 2.215  | 2.367  | 0.0958 | 0.8617 |
| hsa-miR-4326     | 47.4   | 36.36  | 34.16  | 56.25  | 71.75  | 0.49   | 67.01  | 45.97  | 90.65  | 62.9   | 102.85 | 46.13  | 60.94  | 45.97  | 74.65  | 62.13  | 57.51  | 68.63  | 37.3   | 94.12  | 51.294 | 65.023 | 0.3422 | 0.8631 |
| hsa-miR-139-5p   | 625.4  | 326.89 | 27.63  | 327.17 | 594.08 | 488.61 | 338.77 | 35.17  | 321.01 | 341.06 | 1139.3 | 588.08 | 122.47 | 62.74  | 182.69 | 164.03 | 651.2  | 692.39 | 232.41 | 831.57 | 342.58 | 466.69 | 0.446  | 0.8633 |
| hsa-miR-4635     | 0.38   | 0.35   | 0      | 0.57   | 1.43   | 0.49   | 0.28   | 0      | 0      | 0      | 0      | 0      | 0      | 0      | 0      | 1.18   | 0      | 1.94   | 0.36   | 0      | 0.35   | 0.348  | -0.008 | 0.8639 |

|                 |        |        |        |        |        |        |        |        |        |        |        |        |        |        |        |        |        |        |        |        |        |        |        |        |
|-----------------|--------|--------|--------|--------|--------|--------|--------|--------|--------|--------|--------|--------|--------|--------|--------|--------|--------|--------|--------|--------|--------|--------|--------|--------|
| hsa-miR-320c    | 517.98 | 304.03 | 8928.7 | 427.61 | 1904.2 | 846.64 | 678.67 | 3596.2 | 545.16 | 1274.3 | 4102.3 | 1038.8 | 2134.6 | 5281.3 | 3739.3 | 813.31 | 675.97 | 1069   | 247.84 | 2185   | 1902.4 | 2128.7 | 0.1622 | 0.8639 |
| hsa-miR-873-5p  | 3.82   | 0.69   | 0      | 0.57   | 7.17   | 2.93   | 1.99   | 2.8    | 4.35   | 0      | 1.98   | 3.18   | 2.99   | 0      | 0      | 2.12   | 1.33   | 8.07   | 0.72   | 1.79   | 2.432  | 2.218  | -0.133 | 0.864  |
| hsa-miR-23b-3p  | 224.01 | 415.88 | 154.77 | 128    | 96.14  | 245.53 | 120.12 | 133.51 | 194.34 | 80.11  | 217.58 | 318.17 | 68.11  | 47.21  | 114.92 | 246.63 | 297.73 | 434.33 | 68.15  | 205.51 | 179.24 | 201.83 | 0.1713 | 0.865  |
| hsa-miR-6818-5p | 3.06   | 0      | 0      | 0.29   | 1.43   | 0.49   | 0.85   | 1.2    | 1.24   | 1.47   | 1.98   | 1.06   | 1.79   | 0      | 2.95   | 2.59   | 0.44   | 1.5    | 0.36   | 0      | 1.003  | 1.267  | 0.3371 | 0.8652 |
| hsa-miR-539-3p  | 0      | 1.39   | 0      | 0      | 0      | 0.49   | 0      | 0      | 0      | 0      | 0      | 0      | 0.6    | 0      | 0.98   | 0      | 0      | 0      | 1.08   | 0      | 0.188  | 0.266  | 0.5007 | 0.8656 |
| hsa-miR-1292-5p | 30.96  | 21.47  | 91.2   | 50.8   | 137.76 | 60.16  | 43.73  | 146.7  | 78.23  | 101.73 | 98.9   | 74.77  | 115.9  | 134.18 | 158.14 | 38.12  | 39.37  | 42.31  | 41.6   | 164.41 | 76.274 | 90.77  | 0.251  | 0.8656 |
| hsa-miR-454-5p  | 4.2    | 3.12   | 0      | 2.01   | 1.43   | 2.45   | 4.83   | 0      | 0      | 0.49   | 0      | 2.12   | 0.6    | 0      | 0      | 3.53   | 4.87   | 1.79   | 2.87   | 0      | 1.853  | 1.578  | -0.232 | 0.8665 |
| hsa-miR-3155b   | 1.53   | 0      | 0      | 0      | 0      | 0.49   | 0.28   | 1.6    | 0.62   | 0      | 1.98   | 0.53   | 0.6    | 1.24   | 0      | 0.47   | 0      | 0      | 0      | 0      | 0.452  | 0.482  | 0.0927 | 0.8682 |
| hsa-miR-548ac   | 0.76   | 0.69   | 0      | 0.57   | 0      | 3.42   | 0.28   | 0      | 1.24   | 0      | 0      | 0      | 0      | 0      | 2.95   | 1.88   | 1.77   | 0.45   | 1.43   | 0      | 0.696  | 0.848  | 0.285  | 0.8686 |
| hsa-miR-4657    | 0      | 0.35   | 14.26  | 0.86   | 2.87   | 0.49   | 2.56   | 5.6    | 0      | 9.83   | 0      | 2.12   | 13.14  | 13.04  | 8.84   | 2.35   | 0.88   | 3.44   | 0.36   | 0      | 3.682  | 4.417  | 0.2626 | 0.8702 |
| hsa-miR-1307-5p | 18.73  | 12.12  | 57.04  | 12.05  | 4.3    | 16.14  | 12.49  | 56.76  | 8.07   | 12.29  | 7.91   | 25.98  | 24.49  | 27.95  | 19.64  | 23.06  | 12.39  | 38.13  | 4.66   | 69.99  | 20.999 | 25.42  | 0.2756 | 0.8717 |
| hsa-miR-338-5p  | 52.37  | 45.02  | 7.13   | 35.59  | 30.13  | 65.05  | 35.5   | 4      | 21.73  | 26.54  | 41.54  | 54.62  | 19.12  | 3.11   | 27.5   | 29.18  | 61.49  | 76.4   | 46.27  | 24.13  | 32.306 | 38.336 | 0.2469 | 0.8728 |
| hsa-miR-6829-5p | 0.38   | 0      | 8.62   | 0.86   | 1.43   | 0      | 0      | 8.39   | 0      | 2.95   | 0      | 0.53   | 2.39   | 9.32   | 5.89   | 0.47   | 0      | 0.3    | 0.36   | 2.38   | 2.263  | 2.164  | -0.065 | 0.8775 |
| hsa-miR-424-3p  | 119.27 | 67.18  | 60.9   | 111.93 | 154.98 | 149.18 | 138.57 | 98.73  | 122.32 | 60.45  | 120.66 | 146.89 | 80.65  | 18.64  | 65.81  | 173.91 | 203.5  | 110.04 | 85.36  | 274.91 | 108.35 | 128.04 | 0.2408 | 0.8791 |
| hsa-miR-505-5p  | 14.91  | 10.39  | 5.35   | 16.93  | 2.87   | 30.32  | 15.05  | 2.8    | 12.42  | 9.83   | 9.89   | 20.68  | 13.14  | 0      | 5.89   | 8.47   | 9.29   | 23.47  | 13.27  | 29.49  | 12.087 | 13.359 | 0.1444 | 0.8795 |
| hsa-miR-32-3p   | 1.15   | 3.12   | 0      | 0.57   | 2.87   | 0.49   | 0      | 0      | 0      | 0      | 0      | 0.53   | 0      | 0      | 0.98   | 0.47   | 3.54   | 0      | 2.51   | 0      | 0.82   | 0.803  | -0.03  | 0.8795 |
| hsa-miR-6774-5p | 0.76   | 0      | 1.49   | 0      | 0      | 0.98   | 0.28   | 0      | 0      | 0      | 0      | 0.53   | 0      | 0.62   | 2.95   | 0.24   | 0      | 0      | 0      | 0.89   | 0.351  | 0.523  | 0.5753 | 0.8798 |
| hsa-miR-509-3p  | 3.06   | 0.7    | 0      | 1.14   | 0      | 4.9    | 3.98   | 0      | 2.48   | 5.9    | 0      | 0      | 0      | 0      | 0      | 5.18   | 3.54   | 8.08   | 7.18   | 0      | 2.216  | 2.398  | 0.1139 | 0.88   |
| hsa-miR-4690-3p | 2.29   | 0      | 5.35   | 1.15   | 0      | 0.49   | 3.41   | 1.2    | 4.97   | 2.46   | 0      | 0.53   | 1.79   | 0      | 1.96   | 4.47   | 3.1    | 6.58   | 1.79   | 6.25   | 2.132  | 2.647  | 0.3122 | 0.8802 |
| hsa-miR-301a-3p | 0.76   | 1.39   | 0      | 0.57   | 0      | 0      | 0      | 1.6    | 0      | 0      | 0      | 0      | 1.19   | 0      | 0      | 0.94   | 0.88   | 0.3    | 0      | 0      | 0.432  | 0.331  | -0.384 | 0.8803 |

|                   |        |        |       |       |       |        |        |        |        |        |        |        |        |        |        |        |       |        |        |        |        |        |        |        |
|-------------------|--------|--------|-------|-------|-------|--------|--------|--------|--------|--------|--------|--------|--------|--------|--------|--------|-------|--------|--------|--------|--------|--------|--------|--------|
| hsa-miR-15a-5p    | 43.2   | 51.25  | 0     | 30.99 | 28.7  | 18.1   | 24.14  | 9.99   | 10.56  | 3.93   | 23.74  | 23.86  | 16.73  | 0      | 5.89   | 40.71  | 36.72 | 50.09  | 40.89  | 3.57   | 22.086 | 24.22  | 0.1331 | 0.8806 |
| hsa-miR-548aq-3p  | 3.82   | 6.93   | 0     | 1.43  | 0     | 3.42   | 2.84   | 0      | 5.59   | 0      | 11.87  | 4.77   | 1.19   | 0      | 0      | 1.88   | 5.75  | 0.3    | 3.59   | 0      | 2.403  | 2.935  | 0.2885 | 0.8821 |
| hsa-miR-30c-5p    | 866.23 | 849.08 | 14.26 | 478.7 | 119.1 | 627.02 | 434.46 | 38.38  | 389.94 | 282.08 | 150.32 | 674.52 | 142.18 | 67.08  | 163.04 | 437.72 | 1152  | 928.17 | 413.18 | 139.38 | 409.93 | 426.76 | 0.0581 | 0.8828 |
| hsa-miR-1288-3p   | 2.68   | 1.73   | 19.9  | 2.87  | 5.74  | 3.42   | 5.68   | 8.39   | 3.73   | 1.97   | 15.82  | 4.24   | 7.17   | 16.77  | 5.89   | 1.88   | 4.87  | 3.14   | 1.43   | 13.11  | 5.611  | 7.432  | 0.4055 | 0.8842 |
| hsa-miR-320e      | 3.82   | 3.81   | 68.03 | 5.45  | 14.35 | 5.38   | 5.68   | 14.39  | 3.73   | 4.42   | 33.63  | 13.26  | 17.33  | 21.74  | 19.64  | 8.94   | 2.65  | 11.66  | 2.87   | 18.47  | 12.906 | 15.019 | 0.2187 | 0.8863 |
| hsa-miR-4669      | 20.26  | 0.35   | 2.97  | 0.86  | 4.3   | 25.92  | 0.85   | 0.8    | 0      | 131.22 | 108.79 | 0.53   | 1.19   | 139.77 | 2.95   | 32.95  | 11.06 | 1.79   | 1.79   | 1.49   | 18.753 | 30.231 | 0.6889 | 0.8866 |
| hsa-miR-4697-3p   | 0      | 0      | 0     | 0     | 4.3   | 0      | 0      | 0      | 0      | 0      | 0      | 0      | 0      | 0      | 0      | 0      | 0     | 0      | 1.08   | 0      | 0.43   | 0.108  | -1.993 | 0.8887 |
| hsa-miR-6821-5p   | 0      | 0.69   | 5.35  | 0.57  | 0     | 0      | 0.28   | 3.2    | 0.62   | 0      | 9.89   | 1.59   | 0.6    | 0.62   | 1.96   | 0.47   | 0     | 0.75   | 0      | 1.19   | 1.071  | 1.707  | 0.6725 | 0.8899 |
| hsa-miR-3157-5p   | 0.76   | 1.39   | 0     | 1.72  | 0     | 0      | 0.28   | 0      | 0      | 0      | 0      | 0.53   | 0      | 0      | 0      | 0.24   | 0.88  | 0.75   | 0      | 2.08   | 0.415  | 0.448  | 0.1104 | 0.89   |
| hsa-miR-664b-3p   | 0      | 2.08   | 0     | 0.57  | 0     | 0      | 0.28   | 0      | 0.62   | 0      | 0      | 2.65   | 0      | 0      | 0      | 0      | 0     | 0.6    | 0      | 0      | 0.355  | 0.325  | -0.127 | 0.8907 |
| hsa-miR-520c-5p   | 2.28   | 0      | 0     | 0.87  | 0     | 0      | 0      | 0      | 0      | 0      | 0      | 0      | 0      | 0      | 0      | 1.41   | 1.32  | 0      | 0      | 0      | 0.315  | 0.273  | -0.207 | 0.8908 |
| hsa-miR-526a      | 2.28   | 0      | 0     | 0.87  | 0     | 0      | 0      | 0      | 0      | 0      | 0      | 0      | 0      | 0      | 0      | 1.41   | 1.32  | 0      | 0      | 0      | 0.315  | 0.273  | -0.207 | 0.8908 |
| hsa-miR-518d-5p   | 2.28   | 0      | 0     | 0.87  | 0     | 0      | 0      | 0      | 0      | 0      | 0      | 0      | 0      | 0      | 0      | 1.41   | 1.32  | 0      | 0      | 0      | 0.315  | 0.273  | -0.207 | 0.8909 |
| hsa-miR-5001-5p   | 1.15   | 0      | 3.56  | 1.15  | 5.74  | 1.47   | 1.14   | 6      | 0.62   | 2.95   | 0      | 0.53   | 2.99   | 4.97   | 7.86   | 1.18   | 0.44  | 0.9    | 0.72   | 2.98   | 2.378  | 2.257  | -0.075 | 0.892  |
| hsa-miR-19b-1-5p  | 0      | 0.35   | 0     | 0     | 0     | 0      | 0      | 2      | 0      | 0      | 0      | 0      | 0      | 0      | 3.93   | 0      | 0     | 0      | 0      | 0      | 0.235  | 0.393  | 0.7419 | 0.8921 |
| hsa-miR-3137      | 0.38   | 0      | 0.89  | 0.57  | 2.87  | 0      | 0.28   | 0      | 0      | 0      | 0      | 0      | 0.6    | 0      | 3.93   | 0      | 0.88  | 0.45   | 0      | 0      | 0.499  | 0.586  | 0.2319 | 0.8935 |
| hsa-miR-1185-2-3p | 1.15   | 0.35   | 0     | 0     | 0     | 1.96   | 0.28   | 0      | 0.62   | 0      | 0      | 0      | 0      | 0      | 0      | 0.47   | 0.88  | 0.6    | 0.72   | 2.98   | 0.436  | 0.565  | 0.3739 | 0.8941 |
| hsa-miR-548o-3p   | 49.7   | 65.1   | 11.28 | 22.96 | 20.08 | 45     | 35.22  | 4.8    | 29.8   | 13.76  | 166.14 | 47.72  | 19.12  | 7.46   | 15.72  | 24.94  | 63.7  | 18.54  | 27.26  | 0.6    | 29.77  | 39.12  | 0.394  | 0.8951 |
| hsa-miR-339-5p    | 110.09 | 69.95  | 23.77 | 51.37 | 70.31 | 46.95  | 56.79  | 107.52 | 53.4   | 75.19  | 90.99  | 97.57  | 44.81  | 37.89  | 100.19 | 54.36  | 107.5 | 133.36 | 20.09  | 69.99  | 66.534 | 75.675 | 0.1857 | 0.8951 |
| hsa-miR-409-5p    | 3.82   | 5.54   | 4.16  | 0.29  | 0     | 2.45   | 2.27   | 0      | 1.24   | 0.49   | 13.85  | 2.12   | 1.79   | 1.24   | 1.96   | 2.12   | 2.65  | 0      | 3.59   | 0.89   | 2.026  | 3.021  | 0.5764 | 0.8953 |

|                 |        |        |        |        |        |        |        |        |        |        |        |        |        |        |        |        |        |        |        |        |        |        |        |        |
|-----------------|--------|--------|--------|--------|--------|--------|--------|--------|--------|--------|--------|--------|--------|--------|--------|--------|--------|--------|--------|--------|--------|--------|--------|--------|
| hsa-miR-152-3p  | 297.41 | 218.85 | 609.59 | 85.81  | 140.63 | 295.42 | 162.14 | 115.52 | 100.59 | 217.71 | 636.9  | 310.21 | 215.07 | 95.04  | 129.65 | 266.4  | 409.65 | 320.11 | 70.66  | 273.12 | 224.37 | 272.68 | 0.2814 | 0.8958 |
| hsa-miR-4645-3p | 0      | 1.73   | 0      | 1.15   | 0      | 0      | 0      | 0      | 0      | 0      | 0      | 2.12   | 0      | 0      | 0      | 0.71   | 0.88   | 1.05   | 0      | 0      | 0.288  | 0.476  | 0.7249 | 0.8961 |
| hsa-miR-199a-3p | 1469.5 | 2211.7 | 86.74  | 455.74 | 302.78 | 1191.5 | 700.24 | 151.1  | 294.32 | 163.16 | 783.28 | 915.26 | 308.86 | 350.34 | 1439.9 | 1257.1 | 1970   | 853.86 | 338.94 | 170.96 | 702.67 | 838.85 | 0.2556 | 0.8963 |
| hsa-miR-199b-3p | 1469.5 | 2211.7 | 86.74  | 455.74 | 302.78 | 1191.5 | 700.24 | 151.1  | 294.32 | 163.16 | 783.28 | 915.26 | 308.86 | 350.34 | 1439.9 | 1257.1 | 1970   | 853.86 | 338.94 | 170.96 | 702.67 | 838.85 | 0.2556 | 0.8963 |
| hsa-miR-10b-5p  | 3551.3 | 3033.8 | 45.75  | 2019.3 | 994.44 | 5576.3 | 2469.9 | 106.32 | 1898.7 | 1289.1 | 1291.6 | 2914.9 | 990.51 | 150.33 | 419.41 | 2087.2 | 6638.1 | 2817.7 | 3059   | 941.48 | 2098.5 | 2131   | 0.0222 | 0.8966 |
| hsa-miR-548f-3p | 2.68   | 7.27   | 2.38   | 1.15   | 0      | 4.89   | 10.5   | 2      | 4.34   | 2.46   | 11.87  | 5.3    | 7.17   | 0.62   | 2.94   | 6.12   | 7.07   | 1.79   | 5.02   | 0      | 3.767  | 4.79   | 0.3466 | 0.8976 |
| hsa-miR-196b-5p | 31.73  | 28.4   | 1.19   | 22.1   | 2.87   | 18.59  | 17.89  | 2      | 7.45   | 9.83   | 19.78  | 18.03  | 13.74  | 3.73   | 3.93   | 44.95  | 26.99  | 15.55  | 16.5   | 2.68   | 14.205 | 16.588 | 0.2237 | 0.8988 |
| hsa-miR-3611    | 1.53   | 0      | 0      | 0.86   | 2.87   | 0.49   | 1.42   | 6      | 0.62   | 0      | 0      | 1.06   | 1.79   | 0      | 4.91   | 1.88   | 0.88   | 1.79   | 0      | 0      | 1.379  | 1.231  | -0.164 | 0.8995 |
| hsa-miR-3188    | 0      | 0      | 1.19   | 2.01   | 0      | 3.91   | 1.7    | 2.4    | 0.62   | 0.49   | 9.89   | 1.06   | 0      | 0      | 0      | 1.65   | 1.77   | 3.29   | 0.36   | 0      | 1.232  | 1.802  | 0.5486 | 0.8999 |
| hsa-miR-148b-3p | 1031   | 1248   | 181.81 | 677.29 | 1262.8 | 899.46 | 900.16 | 244.23 | 717.15 | 513.07 | 3184.5 | 982.08 | 548.43 | 172.69 | 701.31 | 1011   | 1392.2 | 1156.8 | 569.91 | 391.36 | 767.49 | 1011   | 0.3976 | 0.9014 |
| hsa-miR-1284    | 11.85  | 4.85   | 0      | 5.17   | 0      | 7.34   | 6.53   | 0      | 3.1    | 4.42   | 0      | 4.77   | 0      | 0      | 0      | 3.77   | 12.83  | 8.97   | 9.68   | 0      | 4.326  | 4.002  | -0.112 | 0.9018 |
| hsa-miR-7108-5p | 0      | 0      | 3.27   | 0      | 0      | 0      | 0      | 0      | 0      | 0      | 0      | 0      | 0      | 1.86   | 0.98   | 0      | 0      | 0.15   | 0      | 0      | 0.327  | 0.299  | -0.129 | 0.9019 |
| hsa-miR-6818-3p | 1.91   | 0      | 0      | 1.43   | 0      | 0      | 0.57   | 0      | 0      | 0.49   | 0      | 0.53   | 0      | 0      | 2.95   | 0.71   | 0.88   | 1.2    | 0      | 0.3    | 0.44   | 0.657  | 0.5784 | 0.9023 |
| hsa-miR-1909-5p | 0.76   | 0      | 1.19   | 0      | 0      | 0.49   | 0.85   | 2      | 0      | 0.49   | 0      | 2.12   | 0      | 0.62   | 2.95   | 0      | 0      | 0.3    | 0      | 0      | 0.578  | 0.599  | 0.0515 | 0.9027 |
| hsa-miR-548a-5p | 3.45   | 4.85   | 0      | 0      | 0      | 5.88   | 2.85   | 1.6    | 3.1    | 0      | 0      | 0.53   | 1.19   | 0      | 0      | 3.54   | 3.52   | 0.15   | 7.16   | 0      | 2.173  | 1.609  | -0.434 | 0.9031 |
| hsa-miR-10a-5p  | 1490.1 | 1045.8 | 46.64  | 829.11 | 746.19 | 1683.5 | 983.93 | 46.37  | 775.52 | 851.18 | 749.65 | 1142.8 | 368.01 | 55.29  | 236.72 | 644.34 | 2557.5 | 1348.5 | 1222.3 | 528.07 | 849.83 | 885.31 | 0.059  | 0.9036 |
| hsa-miR-140-5p  | 155.58 | 253.82 | 5.05   | 49.65  | 1.43   | 102.71 | 102.79 | 11.59  | 42.84  | 19.66  | 3.96   | 143.18 | 87.22  | 3.11   | 9.82   | 147.55 | 202.17 | 109.29 | 29.05  | 13.11  | 74.512 | 74.846 | 0.0065 | 0.9046 |
| hsa-miR-135a-3p | 1.53   | 0.35   | 0      | 0.29   | 0      | 0      | 1.42   | 0      | 0      | 0      | 9.89   | 0      | 0      | 0      | 0.98   | 0      | 0.44   | 0.15   | 0      | 0      | 0.359  | 1.146  | 1.6746 | 0.9048 |
| hsa-miR-6862-5p | 0.76   | 0      | 3.56   | 3.44   | 4.3    | 0.98   | 0.85   | 1.6    | 1.24   | 5.41   | 0      | 1.06   | 2.39   | 1.24   | 1.96   | 0.24   | 1.77   | 3.14   | 4.3    | 9.23   | 2.214  | 2.533  | 0.1942 | 0.905  |
| hsa-miR-374c-5p | 0      | 9.7    | 0      | 1.15   | 0      | 0      | 1.42   | 0      | 2.48   | 0      | 0      | 1.59   | 0.6    | 0      | 0      | 3.53   | 6.19   | 0.15   | 1.43   | 0.3    | 1.475  | 1.379  | -0.097 | 0.9052 |

|                  |        |        |        |        |        |        |        |        |        |        |        |        |        |        |        |        |        |        |        |        |        |        |        |        |
|------------------|--------|--------|--------|--------|--------|--------|--------|--------|--------|--------|--------|--------|--------|--------|--------|--------|--------|--------|--------|--------|--------|--------|--------|--------|
| hsa-miR-548c-5p  | 3.45   | 3.12   | 0      | 0      | 0      | 4.41   | 1.71   | 0      | 1.86   | 0      | 0      | 0      | 0      | 0      | 0      | 2.13   | 2.64   | 0      | 5.37   | 0      | 1.455  | 1.014  | -0.521 | 0.9053 |
| hsa-miR-548am-5p | 3.45   | 3.12   | 0      | 0      | 0      | 4.41   | 1.71   | 0      | 1.86   | 0      | 0      | 0      | 0      | 0      | 0      | 2.13   | 2.64   | 0      | 5.37   | 0      | 1.455  | 1.014  | -0.521 | 0.9054 |
| hsa-miR-548o-5p  | 3.45   | 3.12   | 0      | 0      | 0      | 4.41   | 1.71   | 0      | 1.86   | 0      | 0      | 0      | 0      | 0      | 0      | 2.13   | 2.64   | 0      | 5.37   | 0      | 1.455  | 1.014  | -0.521 | 0.9054 |
| hsa-miR-7855-5p  | 1.15   | 0.35   | 2.08   | 1.43   | 4.3    | 0      | 0.85   | 3.6    | 0.62   | 2.46   | 1.98   | 2.12   | 2.99   | 2.48   | 0      | 0.94   | 0.44   | 1.79   | 0.36   | 7.15   | 1.684  | 2.025  | 0.266  | 0.9056 |
| hsa-miR-1299     | 1.53   | 1.39   | 21.09  | 9.76   | 163.59 | 228.41 | 199.91 | 1.6    | 3.1    | 4.91   | 931.62 | 44.54  | 48.99  | 9.32   | 70.72  | 51.3   | 46.89  | 0.6    | 12.19  | 2.98   | 63.529 | 121.92 | 0.9404 | 0.906  |
| hsa-miR-3912-3p  | 3.44   | 3.46   | 0      | 3.44   | 1.43   | 2.93   | 2.27   | 2.4    | 3.1    | 0      | 0      | 2.65   | 0.6    | 0      | 0      | 1.88   | 2.65   | 2.24   | 5.74   | 4.47   | 2.247  | 2.023  | -0.152 | 0.9064 |
| hsa-miR-21-5p    | 8701.3 | 9893.3 | 675.83 | 3995.2 | 1216.9 | 6176.4 | 5040   | 854.99 | 2633.3 | 1437   | 1833.6 | 7029.9 | 3073.1 | 580.81 | 1900.6 | 5081.8 | 12778  | 8020.1 | 3659.1 | 2865.2 | 4062.4 | 4682.3 | 0.2049 | 0.9065 |
| hsa-miR-6727-5p  | 0      | 0      | 0.89   | 0      | 1.43   | 0      | 0      | 0      | 1.24   | 0.98   | 0      | 0      | 0.6    | 0      | 0      | 0.71   | 0.44   | 0      | 0      | 4.17   | 0.454  | 0.592  | 0.3829 | 0.908  |
| hsa-miR-197-3p   | 235.86 | 130.89 | 25.85  | 134.02 | 57.4   | 247    | 102.51 | 30.78  | 163.3  | 86.49  | 87.03  | 156.43 | 23.9   | 24.85  | 44.2   | 63.78  | 210.58 | 139.79 | 330.69 | 99.78  | 121.41 | 118.1  | -0.04  | 0.9082 |
| hsa-miR-19b-3p   | 546.26 | 1297.9 | 1056.4 | 664.09 | 218.12 | 471.01 | 643.74 | 1171.2 | 913.98 | 467.86 | 106.8  | 1160.8 | 2514.5 | 239.78 | 506.82 | 1184.4 | 1216.1 | 464.98 | 436.5  | 285.03 | 745.05 | 811.58 | 0.1234 | 0.9085 |
| hsa-miR-5187-5p  | 0.38   | 0.69   | 11.88  | 0.29   | 0      | 0      | 1.14   | 11.99  | 2.48   | 2.46   | 7.91   | 2.12   | 3.58   | 13.04  | 10.8   | 0.24   | 1.77   | 2.24   | 0.36   | 0      | 3.131  | 4.206  | 0.4258 | 0.9086 |
| hsa-miR-509-3-5p | 1.15   | 1.39   | 0      | 0.57   | 1.43   | 0.98   | 1.7    | 0      | 0.62   | 0      | 0      | 0.53   | 0      | 0      | 0      | 1.65   | 1.33   | 0.9    | 0.72   | 1.79   | 0.784  | 0.692  | -0.18  | 0.9089 |
| hsa-miR-195-3p   | 20.26  | 14.89  | 0      | 7.75   | 21.52  | 25.43  | 19.88  | 1.2    | 5.59   | 0.98   | 61.32  | 21.74  | 6.57   | 3.73   | 0      | 21.89  | 26.99  | 15.4   | 3.59   | 0.6    | 11.75  | 16.183 | 0.4618 | 0.9102 |
| hsa-miR-665      | 3.06   | 1.04   | 5.35   | 0.57   | 2.87   | 0      | 0.28   | 2.8    | 0      | 0      | 7.91   | 2.12   | 1.19   | 0.62   | 0      | 1.18   | 0.44   | 0      | 0.72   | 5.36   | 1.597  | 1.954  | 0.2911 | 0.911  |
| hsa-miR-92a-2-5p | 0      | 0.35   | 0      | 1.15   | 0      | 0      | 0      | 0      | 1.86   | 0      | 0      | 0      | 0      | 0      | 0      | 0      | 0      | 0.6    | 0.72   | 3.87   | 0.336  | 0.519  | 0.6273 | 0.9122 |
| hsa-miR-181b-5p  | 667.06 | 680.78 | 233.79 | 293.59 | 634.26 | 564.91 | 504.89 | 534.02 | 269.47 | 173.48 | 704.15 | 625.73 | 407.44 | 159.64 | 283.86 | 625.98 | 722.86 | 606.87 | 292.67 | 500.67 | 455.63 | 492.99 | 0.1137 | 0.9129 |
| hsa-miR-519d-3p  | 1.15   | 0.69   | 0      | 1.72   | 0      | 0.49   | 0      | 0      | 0      | 0      | 0      | 0      | 0      | 0      | 0      | 0.24   | 0      | 0      | 0      | 4.77   | 0.405  | 0.501  | 0.3069 | 0.9135 |
| hsa-miR-4787-3p  | 0.38   | 0      | 0      | 0      | 0      | 0      | 0      | 2      | 1.24   | 0.98   | 0      | 2.12   | 0      | 0      | 1.96   | 0      | 0      | 0.6    | 1.08   | 0      | 0.46   | 0.576  | 0.3244 | 0.9139 |
| hsa-miR-92b-5p   | 6.88   | 2.42   | 45.15  | 12.34  | 20.09  | 13.21  | 10.79  | 83.14  | 15.52  | 26.05  | 13.85  | 18.03  | 26.29  | 42.24  | 73.67  | 7.53   | 7.08   | 8.37   | 13.27  | 66.42  | 23.559 | 27.675 | 0.2323 | 0.9151 |
| hsa-miR-3187-3p  | 21.41  | 2.77   | 12.48  | 10.04  | 10.04  | 12.23  | 5.11   | 20.39  | 5.59   | 17.2   | 23.74  | 7.95   | 7.77   | 11.8   | 8.84   | 8.94   | 7.52   | 15.55  | 20.09  | 25.32  | 11.726 | 13.752 | 0.2299 | 0.916  |

|                 |       |        |        |        |        |        |        |        |        |        |        |        |        |        |        |        |        |        |        |        |        |        |        |        |
|-----------------|-------|--------|--------|--------|--------|--------|--------|--------|--------|--------|--------|--------|--------|--------|--------|--------|--------|--------|--------|--------|--------|--------|--------|--------|
| hsa-miR-10b-3p  | 27.14 | 18.01  | 11.29  | 15.78  | 30.13  | 26.41  | 17.32  | 11.99  | 4.97   | 15.73  | 43.52  | 22.27  | 14.34  | 0      | 12.77  | 26.36  | 34.95  | 26.61  | 11.48  | 8.94   | 17.877 | 20.124 | 0.1708 | 0.9161 |
| hsa-miR-18a-3p  | 35.93 | 37.4   | 10.4   | 63.42  | 37.31  | 53.8   | 47.42  | 33.98  | 47.81  | 34.4   | 5.93   | 36.06  | 51.98  | 16.77  | 28.48  | 57.42  | 61.93  | 72.06  | 56.31  | 53.61  | 40.187 | 44.055 | 0.1326 | 0.9194 |
| hsa-miR-130b-5p | 88.3  | 4.5    | 2.67   | 21.52  | 121.97 | 56.74  | 46.85  | 0.8    | 11.8   | 72.73  | 261.09 | 23.86  | 10.16  | 3.73   | 26.52  | 15.77  | 73.44  | 62.35  | 44.12  | 32.76  | 42.788 | 55.38  | 0.3722 | 0.9196 |
| hsa-miR-190a-5p | 0     | 0.35   | 0      | 2.58   | 0      | 0      | 1.42   | 1.2    | 0.62   | 0      | 0      | 2.12   | 0      | 0      | 0      | 1.18   | 0.88   | 1.2    | 0.72   | 0      | 0.617  | 0.61   | -0.017 | 0.9196 |
| hsa-miR-4638-3p | 0.76  | 0      | 1.19   | 0.57   | 2.87   | 1.47   | 0      | 0.8    | 0      | 0      | 0      | 1.59   | 0      | 0      | 4.91   | 0      | 0      | 0.6    | 0      | 0      | 0.766  | 0.71   | -0.11  | 0.9209 |
| hsa-miR-204-5p  | 7.65  | 3.12   | 0      | 3.73   | 2.87   | 5.38   | 2.56   | 10.79  | 6.83   | 2.46   | 0      | 9.55   | 1.79   | 0      | 0.98   | 1.18   | 7.08   | 17.34  | 7.53   | 4.17   | 4.539  | 4.962  | 0.1285 | 0.9224 |
| hsa-miR-4746-5p | 18.73 | 6.23   | 3.86   | 8.9    | 1.43   | 14.67  | 18.46  | 25.58  | 11.8   | 10.81  | 15.82  | 10.08  | 22.1   | 3.11   | 3.93   | 14.59  | 12.39  | 20.48  | 8.97   | 21.74  | 12.047 | 13.321 | 0.145  | 0.9242 |
| hsa-miR-6807-5p | 0.76  | 0.35   | 23.77  | 2.01   | 10.04  | 2.45   | 1.7    | 12.39  | 1.86   | 2.95   | 9.89   | 2.65   | 10.75  | 8.7    | 12.77  | 2.12   | 2.65   | 2.39   | 2.15   | 9.53   | 5.828  | 6.36   | 0.126  | 0.9261 |
| hsa-miR-410-3p  | 4.2   | 9.35   | 2.08   | 1.43   | 0      | 1.47   | 5.4    | 0      | 3.73   | 2.95   | 15.82  | 4.77   | 1.79   | 0.62   | 0.98   | 4.71   | 4.42   | 1.64   | 4.3    | 0      | 3.061  | 3.905  | 0.3513 | 0.9274 |
| hsa-miR-24-3p   | 9608  | 7288.5 | 1774.4 | 4409.6 | 2989.1 | 7191.3 | 5944.7 | 1538.5 | 3827.3 | 2399.2 | 12631  | 7558.6 | 2828.2 | 1152.9 | 2235.5 | 5495.3 | 9672.4 | 9938.2 | 3247.7 | 5047.2 | 4697.1 | 5980.7 | 0.3486 | 0.9291 |
| hsa-miR-6857-3p | 0     | 0      | 0      | 0.86   | 2.87   | 0.98   | 1.42   | 0.8    | 1.24   | 0.98   | 0      | 1.06   | 1.19   | 0      | 0      | 0.71   | 0.88   | 2.69   | 2.15   | 0      | 0.915  | 0.868  | -0.076 | 0.9293 |
| hsa-miR-6753-3p | 0     | 0.35   | 0.89   | 0.29   | 0      | 0      | 0.85   | 2.8    | 1.86   | 0      | 0      | 0      | 0      | 0      | 2.95   | 1.18   | 0      | 0.15   | 0      | 3.57   | 0.704  | 0.785  | 0.1571 | 0.9309 |
| hsa-miR-744-3p  | 1.53  | 1.04   | 0      | 0.86   | 0      | 1.47   | 1.42   | 0.8    | 2.48   | 0      | 0      | 0.53   | 0      | 0      | 0      | 0.94   | 2.65   | 1.64   | 1.79   | 1.19   | 0.96   | 0.874  | -0.135 | 0.9313 |
| hsa-miR-6734-5p | 5.35  | 4.16   | 67.14  | 7.17   | 8.61   | 5.38   | 6.53   | 41.97  | 8.69   | 15.73  | 3.96   | 9.55   | 24.49  | 67.71  | 40.27  | 7.53   | 3.1    | 7.48   | 6.1    | 23.23  | 17.073 | 19.342 | 0.18   | 0.9322 |
| hsa-miR-6884-5p | 3.06  | 2.77   | 41.29  | 6.31   | 24.39  | 7.34   | 10.22  | 26.78  | 9.93   | 12.78  | 19.78  | 9.55   | 21.51  | 37.89  | 50.09  | 5.88   | 3.98   | 6.43   | 1.08   | 16.98  | 14.487 | 17.317 | 0.2574 | 0.9333 |
| hsa-miR-6837-5p | 1.53  | 0      | 0      | 0.57   | 1.43   | 0      | 1.42   | 0      | 0.62   | 1.97   | 0      | 0      | 1.19   | 0      | 0      | 0.24   | 3.1    | 2.09   | 1.79   | 0      | 0.754  | 0.841  | 0.1575 | 0.9345 |
| hsa-miR-589-5p  | 71.48 | 122.24 | 93.58  | 94.71  | 269.78 | 67.99  | 139.99 | 109.92 | 101.83 | 62.41  | 619.1  | 96.51  | 72.29  | 108.09 | 138.49 | 126.84 | 82.28  | 117.97 | 31.56  | 115.56 | 113.39 | 150.87 | 0.412  | 0.9347 |
| hsa-miR-548av-2 | 54.28 | 70.99  | 11.28  | 27.56  | 24.37  | 49.9   | 39.48  | 4.8    | 34.14  | 14.74  | 170.1  | 53.55  | 22.1   | 7.46   | 17.68  | 29.18  | 72.1   | 23.77  | 31.92  | 7.74   | 33.154 | 43.56  | 0.3938 | 0.9358 |
| hsa-miR-4498    | 0     | 1.04   | 7.72   | 0.86   | 1.43   | 0.49   | 2.56   | 5.6    | 3.1    | 1.47   | 3.96   | 1.59   | 2.99   | 1.24   | 11.79  | 2.35   | 2.21   | 0.75   | 0.36   | 4.77   | 2.427  | 3.201  | 0.3993 | 0.9378 |
| hsa-miR-378f    | 9.56  | 10.04  | 173.79 | 7.46   | 153.54 | 13.21  | 10.79  | 122.71 | 9.31   | 27.52  | 207.69 | 24.39  | 47.79  | 116.78 | 84.47  | 20.94  | 7.08   | 41.71  | 6.1    | 79.82  | 53.793 | 63.677 | 0.2434 | 0.9396 |

|                 |        |        |        |        |        |        |        |        |        |        |        |        |        |        |        |        |        |        |        |        |        |        |        |        |
|-----------------|--------|--------|--------|--------|--------|--------|--------|--------|--------|--------|--------|--------|--------|--------|--------|--------|--------|--------|--------|--------|--------|--------|--------|--------|
| hsa-miR-4429    | 21.02  | 8.31   | 389.76 | 25.25  | 58.83  | 31.79  | 32.37  | 165.88 | 36.63  | 66.34  | 106.81 | 48.79  | 129.04 | 319.91 | 166.98 | 28.95  | 23     | 36.63  | 8.25   | 128.37 | 83.618 | 99.673 | 0.2534 | 0.9397 |
| hsa-miR-3679-5p | 0.38   | 0.69   | 3.27   | 0      | 5.74   | 1.47   | 0.57   | 0.8    | 0      | 0      | 0      | 2.65   | 0.6    | 0      | 0      | 1.41   | 1.77   | 2.99   | 0.36   | 0.6    | 1.292  | 1.038  | -0.316 | 0.9399 |
| hsa-let-7f-5p   | 13445  | 5665.9 | 64.46  | 5589.4 | 3294.7 | 7022   | 5207.6 | 100.73 | 1472.8 | 1124.9 | 3572.2 | 3569.8 | 742.59 | 252.2  | 871.23 | 3354.7 | 13658  | 10664  | 8021.5 | 2225.2 | 4298.8 | 4693.1 | 0.1266 | 0.9411 |
| hsa-miR-3176    | 3.44   | 2.08   | 4.46   | 3.16   | 12.91  | 0.98   | 3.41   | 16.39  | 4.97   | 2.46   | 3.96   | 5.3    | 2.39   | 7.45   | 10.8   | 4.24   | 1.33   | 13.01  | 2.15   | 8.34   | 5.426  | 5.897  | 0.1201 | 0.9422 |
| hsa-miR-296-3p  | 1.53   | 2.42   | 40.7   | 1.15   | 4.3    | 3.91   | 2.27   | 8.39   | 0      | 1.97   | 47.47  | 3.71   | 4.18   | 16.77  | 5.89   | 5.18   | 2.21   | 4.04   | 1.43   | 5.36   | 6.664  | 9.624  | 0.5302 | 0.944  |
| hsa-miR-376c-3p | 0      | 4.5    | 0      | 0      | 0      | 1.96   | 0.57   | 0      | 0      | 0      | 0      | 2.12   | 0      | 0      | 0      | 1.18   | 1.77   | 0.3    | 2.15   | 0      | 0.703  | 0.752  | 0.0972 | 0.9442 |
| hsa-miR-422a    | 9.56   | 5.54   | 82.88  | 6.89   | 117.67 | 6.85   | 5.68   | 55.16  | 8.69   | 27.52  | 146.37 | 15.38  | 33.46  | 83.24  | 49.11  | 14.12  | 8.41   | 16     | 5.74   | 35.74  | 32.644 | 40.757 | 0.3202 | 0.9451 |
| hsa-miR-126-3p  | 12904  | 9497.1 | 139.92 | 5709.3 | 2943.1 | 6935   | 6933.5 | 607.97 | 4575.5 | 839.88 | 7354.1 | 10870  | 2099.9 | 361.53 | 1473.3 | 4789.7 | 10810  | 12097  | 4052.9 | 4116.2 | 5108.6 | 5802.4 | 0.1837 | 0.9456 |
| hsa-miR-1468-5p | 9.94   | 1.73   | 0.89   | 5.74   | 8.61   | 9.29   | 6.25   | 2      | 4.97   | 15.73  | 17.8   | 12.73  | 4.18   | 0      | 1.96   | 4.24   | 7.52   | 7.03   | 7.89   | 14.59  | 6.515  | 7.794  | 0.2586 | 0.9457 |
| hsa-miR-2116-3p | 0.38   | 1.39   | 4.75   | 0.57   | 1.43   | 1.96   | 0.57   | 0      | 0      | 0      | 7.91   | 2.12   | 2.39   | 0      | 0      | 1.18   | 2.21   | 0.3    | 0.72   | 0.3    | 1.105  | 1.713  | 0.6325 | 0.946  |
| hsa-miR-3158-3p | 287.85 | 260.4  | 1514.5 | 477.26 | 902.6  | 374.65 | 592.06 | 1608.9 | 761.23 | 189.21 | 1720.8 | 685.12 | 954.07 | 1138   | 935.08 | 797.78 | 249.95 | 566.65 | 165.34 | 939.99 | 696.86 | 815.28 | 0.2264 | 0.9462 |
| hsa-miR-6741-5p | 4.2    | 2.08   | 45.15  | 6.6    | 15.78  | 12.72  | 8.8    | 97.13  | 16.14  | 17.69  | 67.25  | 6.36   | 15.53  | 40.38  | 85.45  | 6.82   | 4.42   | 6.43   | 3.95   | 62.55  | 22.629 | 29.914 | 0.4026 | 0.9471 |
| hsa-miR-3131    | 28.29  | 15.93  | 190.12 | 0      | 0      | 1.47   | 1.99   | 0      | 0      | 0      | 447.02 | 1.06   | 5.38   | 3.11   | 0      | 39.07  | 1.77   | 0      | 0.72   | 0      | 23.78  | 49.813 | 1.0668 | 0.9472 |
| hsa-miR-200b-3p | 26.76  | 37.74  | 2.67   | 16.07  | 7.17   | 31.79  | 20.73  | 17.59  | 9.93   | 4.91   | 0      | 16.44  | 12.55  | 7.45   | 32.41  | 21.65  | 27.87  | 37.08  | 16.5   | 9.53   | 17.536 | 18.148 | 0.0495 | 0.9489 |
| hsa-let-7d-5p   | 2135.4 | 913.14 | 35.95  | 1147.7 | 677.31 | 1483.5 | 1570.6 | 72.75  | 564.41 | 901.31 | 981.07 | 1462.5 | 497.65 | 59.01  | 205.29 | 970.98 | 1964.7 | 3217.8 | 888.76 | 984.36 | 950.19 | 1123.2 | 0.2413 | 0.9503 |
| hsa-miR-455-5p  | 121.94 | 96.27  | 12.48  | 7.46   | 5.74   | 116.41 | 83.48  | 11.59  | 6.83   | 8.35   | 148.35 | 99.16  | 47.2   | 4.35   | 5.89   | 123.08 | 110.6  | 14.05  | 3.95   | 0      | 47.055 | 55.663 | 0.2424 | 0.9531 |
| hsa-miR-584-5p  | 1395.3 | 299.53 | 49.31  | 463.2  | 301.35 | 918.53 | 587.23 | 81.54  | 410.42 | 553.36 | 344.17 | 602.4  | 168.47 | 65.22  | 162.07 | 453.49 | 1490   | 1067.2 | 720.55 | 612.96 | 505.98 | 568.65 | 0.1685 | 0.9532 |
| hsa-miR-4755-3p | 2.29   | 0.69   | 6.83   | 3.44   | 7.17   | 3.91   | 5.68   | 3.6    | 3.73   | 8.35   | 11.87  | 1.59   | 6.57   | 8.7    | 10.8   | 2.35   | 4.87   | 3.89   | 1.43   | 3.87   | 4.569  | 5.594  | 0.292  | 0.9539 |
| hsa-miR-99a-5p  | 6974.9 | 5858.4 | 1752.7 | 4959.2 | 4197.3 | 12683  | 7879.4 | 3264.1 | 5530.4 | 6953.9 | 11765  | 10992  | 5781.8 | 2022   | 2213   | 10232  | 7913.9 | 8181.2 | 4128.6 | 7181.8 | 6005.3 | 7041   | 0.2295 | 0.9548 |
| hsa-miR-455-3p  | 4.2    | 3.12   | 0.3    | 0.29   | 0      | 2.93   | 0.28   | 0      | 1.24   | 0.49   | 0      | 4.24   | 0      | 1.24   | 1.96   | 3.53   | 2.21   | 1.35   | 0      | 0      | 1.285  | 1.453  | 0.1773 | 0.9552 |

|                 |        |        |        |        |        |        |        |        |        |        |        |        |        |        |        |        |        |        |        |        |        |        |        |        |
|-----------------|--------|--------|--------|--------|--------|--------|--------|--------|--------|--------|--------|--------|--------|--------|--------|--------|--------|--------|--------|--------|--------|--------|--------|--------|
| hsa-miR-222-3p  | 1392.2 | 458.48 | 48.72  | 542.41 | 246.82 | 860.82 | 680.66 | 92.73  | 360.13 | 539.11 | 488.56 | 974.12 | 316.63 | 65.22  | 122.78 | 403.36 | 1485.5 | 922.49 | 740.64 | 361.58 | 522.21 | 588.09 | 0.1714 | 0.9602 |
| hsa-miR-28-3p   | 910.19 | 442.2  | 579.88 | 440.53 | 684.48 | 817.29 | 677.25 | 526.43 | 503.56 | 891.48 | 1568.5 | 837.31 | 547.83 | 644.17 | 712.11 | 476.55 | 1012.2 | 1042.4 | 411.74 | 731.5  | 647.33 | 798.43 | 0.3027 | 0.9611 |
| hsa-miR-9-3p    | 5.73   | 4.16   | 0.3    | 0.29   | 0      | 2.45   | 1.42   | 0      | 0.62   | 0.98   | 0      | 0.53   | 1.19   | 0.62   | 0      | 2.35   | 3.98   | 4.04   | 3.23   | 0.3    | 1.595  | 1.624  | 0.026  | 0.9617 |
| hsa-miR-362-5p  | 2.68   | 1.04   | 14.85  | 1.72   | 8.61   | 0.49   | 2.56   | 57.96  | 5.59   | 4.91   | 3.96   | 10.61  | 20.31  | 18.64  | 17.68  | 8      | 6.19   | 8.37   | 0      | 7.45   | 10.041 | 10.121 | 0.0114 | 0.9619 |
| hsa-miR-425-3p  | 102.07 | 149.94 | 193.39 | 76.91  | 330.04 | 81.68  | 120.97 | 259.82 | 106.18 | 71.75  | 403.5  | 186.66 | 159.51 | 195.05 | 251.45 | 149.67 | 107.94 | 190.93 | 24.39  | 106.92 | 149.28 | 177.6  | 0.2507 | 0.9627 |
| hsa-miR-6875-5p | 0      | 0.35   | 7.13   | 0.57   | 0      | 0.98   | 0.28   | 3.6    | 0      | 1.47   | 0      | 1.59   | 2.39   | 3.73   | 7.86   | 0.47   | 0      | 0.9    | 0      | 0.89   | 1.438  | 1.783  | 0.3102 | 0.9628 |
| hsa-miR-4772-5p | 1.15   | 4.85   | 2.67   | 1.15   | 4.3    | 1.96   | 0.85   | 0.8    | 0      | 0      | 0      | 1.59   | 5.38   | 0      | 3.93   | 0.71   | 4.87   | 2.69   | 0      | 0      | 1.773  | 1.917  | 0.1127 | 0.9631 |
| hsa-miR-361-5p  | 146.03 | 98.34  | 4.75   | 39.32  | 15.78  | 94.4   | 62.76  | 0.4    | 52.78  | 23.59  | 15.82  | 70     | 20.31  | 0.62   | 13.75  | 68.48  | 201.29 | 106    | 68.15  | 22.34  | 53.815 | 58.676 | 0.1248 | 0.9643 |
| hsa-miR-98-5p   | 168.96 | 116.7  | 3.27   | 64.57  | 12.91  | 99.78  | 86.61  | 3.6    | 31.67  | 11.3   | 29.67  | 50.91  | 12.55  | 4.97   | 21.61  | 57.42  | 195.09 | 154.3  | 90.02  | 43.19  | 59.937 | 65.973 | 0.1384 | 0.965  |
| hsa-miR-615-3p  | 36.7   | 0.69   | 12.77  | 5.74   | 0      | 47.44  | 12.49  | 4.8    | 2.48   | 0.49   | 9.89   | 14.85  | 8.96   | 6.21   | 1.96   | 16     | 26.99  | 16.3   | 13.27  | 23.23  | 12.36  | 13.766 | 0.1554 | 0.965  |
| hsa-miR-92b-3p  | 142.59 | 100.42 | 7.72   | 144.64 | 24.39  | 187.82 | 111.03 | 14.39  | 113.01 | 52.58  | 7.91   | 95.45  | 20.31  | 1.24   | 14.73  | 112.49 | 145.55 | 133.22 | 299.84 | 49.44  | 89.859 | 88.018 | -0.03  | 0.9652 |
| hsa-miR-93-5p   | 1294.8 | 1908.7 | 499.37 | 1121   | 1070.5 | 858.37 | 1462.7 | 733.48 | 814.01 | 564.18 | 745.69 | 1429.1 | 1743.3 | 317.43 | 866.32 | 1550.1 | 1746.1 | 1413.6 | 882.31 | 485.18 | 1032.7 | 1117.9 | 0.1144 | 0.9652 |
| hsa-miR-501-5p  | 4.2    | 6.93   | 13.67  | 5.45   | 15.78  | 8.31   | 8.52   | 23.58  | 6.83   | 11.79  | 11.87  | 6.36   | 15.53  | 10.56  | 21.61  | 7.77   | 8.41   | 8.52   | 3.23   | 28.89  | 10.506 | 12.275 | 0.2245 | 0.9662 |
| hsa-miR-412-5p  | 6.88   | 3.81   | 4.75   | 4.3    | 10.04  | 10.27  | 5.68   | 2.8    | 0.62   | 9.83   | 57.36  | 3.71   | 1.79   | 6.83   | 4.91   | 8.94   | 4.42   | 3.29   | 2.15   | 3.28   | 5.898  | 9.668  | 0.713  | 0.9672 |
| hsa-let-7a-5p   | 18487  | 6211.6 | 279.24 | 8906.4 | 8685.9 | 10397  | 9208.3 | 352.55 | 2472.5 | 3723.2 | 9828.5 | 6546.3 | 1471.4 | 428    | 1455.7 | 5378.3 | 15715  | 18786  | 9698.6 | 5650.9 | 6872.4 | 7495.9 | 0.1253 | 0.9676 |
| hsa-let-7c-5p   | 883.43 | 310.27 | 40.1   | 564.22 | 489.33 | 590.35 | 533.56 | 66.35  | 204.9  | 154.8  | 447.02 | 427.94 | 149.35 | 82.62  | 138.49 | 402.18 | 483.97 | 1344.4 | 400.98 | 376.17 | 383.73 | 425.31 | 0.1484 | 0.9677 |
| hsa-miR-200b-5p | 5.73   | 1.04   | 0      | 2.01   | 11.48  | 3.91   | 3.41   | 0      | 0.62   | 1.47   | 3.96   | 2.12   | 0.6    | 0      | 5.89   | 2.35   | 1.77   | 4.34   | 3.95   | 3.28   | 2.967  | 2.826  | -0.07  | 0.9698 |
| hsa-miR-197-5p  | 1.53   | 1.39   | 6.54   | 1.72   | 5.74   | 0.98   | 0.57   | 8.39   | 0      | 0.49   | 11.87  | 1.59   | 5.97   | 1.24   | 6.88   | 1.65   | 0.88   | 2.84   | 0      | 3.28   | 2.735  | 3.62   | 0.4044 | 0.9704 |
| hsa-miR-501-3p  | 494.66 | 253.13 | 218.94 | 506.53 | 938.48 | 516.98 | 655.38 | 483.26 | 518.46 | 881.16 | 419.33 | 661.79 | 523.93 | 500.06 | 612.91 | 730.94 | 417.62 | 1014.1 | 436.13 | 739.84 | 546.7  | 605.67 | 0.1478 | 0.9716 |
| hsa-miR-4677-3p | 2.68   | 5.19   | 1.49   | 3.16   | 0      | 4.4    | 1.99   | 4.8    | 4.35   | 0      | 11.87  | 1.59   | 4.78   | 0      | 3.93   | 5.41   | 3.98   | 5.08   | 0.36   | 0      | 2.806  | 3.7    | 0.399  | 0.9738 |

|                 |        |        |        |        |        |        |        |        |        |        |        |        |        |        |        |        |        |        |        |        |        |        |        |        |
|-----------------|--------|--------|--------|--------|--------|--------|--------|--------|--------|--------|--------|--------|--------|--------|--------|--------|--------|--------|--------|--------|--------|--------|--------|--------|
| hsa-miR-107     | 956.83 | 797.49 | 341.04 | 826.52 | 710.31 | 458.29 | 768.97 | 534.42 | 423.46 | 252.11 | 468.78 | 802.84 | 788.59 | 243.51 | 563.8  | 1148.2 | 711.36 | 1168   | 394.17 | 349.07 | 606.94 | 663.83 | 0.1293 | 0.9746 |
| hsa-miR-374a-5p | 31.73  | 84.49  | 0.89   | 18.94  | 4.3    | 33.26  | 30.38  | 2.4    | 24.84  | 4.42   | 1.98   | 33.41  | 13.14  | 2.48   | 8.84   | 39.77  | 56.18  | 68.48  | 22.6   | 1.79   | 23.565 | 24.867 | 0.0776 | 0.977  |
| hsa-miR-2278    | 1.53   | 1.39   | 12.18  | 0.57   | 7.17   | 0.98   | 0.28   | 2      | 0      | 5.41   | 1.98   | 0.53   | 2.99   | 12.42  | 3.93   | 1.41   | 1.77   | 1.79   | 0      | 7.15   | 3.151  | 3.397  | 0.1085 | 0.9772 |
| hsa-miR-23b-5p  | 14.91  | 4.16   | 0      | 13.2   | 17.22  | 23.48  | 13.35  | 5.6    | 9.31   | 27.03  | 11.87  | 22.8   | 16.73  | 12.42  | 5.89   | 10.83  | 16.37  | 6.58   | 18.65  | 13.11  | 12.826 | 13.525 | 0.0766 | 0.9786 |
| hsa-miR-126-5p  | 124.62 | 123.97 | 0.3    | 36.16  | 47.35  | 57.71  | 54.52  | 7.19   | 29.8   | 18.18  | 11.87  | 64.69  | 18.52  | 2.48   | 22.59  | 49.66  | 178.28 | 138.45 | 32.64  | 28     | 49.98  | 54.718 | 0.1307 | 0.9811 |
| hsa-miR-191-3p  | 20.64  | 5.54   | 24.36  | 7.17   | 5.74   | 13.21  | 11.64  | 19.59  | 10.56  | 15.73  | 21.76  | 13.79  | 5.38   | 24.23  | 10.8   | 8.94   | 19.02  | 28.71  | 9.68   | 14.89  | 13.418 | 15.72  | 0.2284 | 0.9825 |
| hsa-miR-885-5p  | 6.12   | 15.93  | 0      | 3.44   | 11.48  | 8.8    | 5.96   | 0      | 1.86   | 9.34   | 0      | 11.14  | 0      | 0      | 0      | 5.18   | 6.19   | 6.88   | 24.03  | 0      | 6.293  | 5.342  | -0.236 | 0.983  |
| hsa-let-7a-3p   | 66.9   | 64.06  | 4.75   | 41.04  | 57.4   | 57.22  | 46     | 3.6    | 20.49  | 11.3   | 59.34  | 29.7   | 8.96   | 3.73   | 23.57  | 47.54  | 101.75 | 48.59  | 65.28  | 1.49   | 37.276 | 38.995 | 0.065  | 0.9846 |
| hsa-miR-1304-5p | 30.2   | 5.89   | 27.33  | 10.33  | 34.44  | 7.34   | 13.91  | 13.99  | 29.18  | 44.23  | 96.92  | 34.47  | 16.73  | 30.44  | 29.47  | 12.24  | 15.93  | 31.1   | 3.23   | 23.83  | 21.684 | 29.436 | 0.441  | 0.9847 |
| hsa-miR-505-3p  | 24.08  | 23.2   | 9.51   | 13.2   | 24.39  | 20.05  | 17.89  | 17.99  | 14.9   | 10.81  | 65.27  | 30.76  | 16.73  | 9.32   | 5.89   | 8      | 29.64  | 27.21  | 7.53   | 24.42  | 17.602 | 22.477 | 0.3527 | 0.9852 |
| hsa-miR-4685-3p | 10.32  | 5.89   | 10.69  | 17.22  | 11.48  | 19.56  | 9.65   | 19.59  | 21.73  | 7.86   | 0      | 12.2   | 7.77   | 14.91  | 11.79  | 11.3   | 7.08   | 24.67  | 28.33  | 18.47  | 13.399 | 13.652 | 0.027  | 0.986  |
| hsa-miR-625-5p  | 7.65   | 10.04  | 0      | 5.74   | 0      | 8.31   | 4.26   | 0      | 2.48   | 0.98   | 0      | 3.71   | 0.6    | 0      | 0      | 6.82   | 10.17  | 15.55  | 5.74   | 0.3    | 3.946  | 4.289  | 0.1203 | 0.9866 |
| hsa-miR-27b-3p  | 829.91 | 981.01 | 41.89  | 350.99 | 793.54 | 683.28 | 431.91 | 119.91 | 235.95 | 143.99 | 1131.4 | 590.73 | 147.56 | 108.09 | 401.73 | 568.09 | 938.75 | 760.72 | 401.34 | 319.58 | 461.24 | 536.8  | 0.2189 | 0.9876 |
| hsa-miR-106b-5p | 181.58 | 155.83 | 62.68  | 123.98 | 34.44  | 112    | 128.07 | 217.05 | 152.12 | 20.64  | 15.82  | 177.64 | 176.24 | 17.39  | 62.86  | 244.98 | 134.49 | 281.38 | 81.42  | 74.16  | 118.84 | 126.64 | 0.0917 | 0.9877 |
| hsa-miR-4467    | 0      | 1.73   | 0      | 13.78  | 10.04  | 11.25  | 0      | 4.4    | 11.18  | 8.35   | 0      | 4.77   | 6.57   | 0      | 0      | 6.59   | 0.88   | 2.24   | 15.42  | 25.61  | 6.073  | 6.208  | 0.0317 | 0.9915 |
| hsa-miR-7-5p    | 2949.2 | 2621.7 | 467.88 | 2246.8 | 873.9  | 2599.1 | 3512.9 | 1645.6 | 2260.7 | 2155.5 | 1204.6 | 2483.8 | 4263.8 | 645.41 | 710.16 | 3758.3 | 4368.2 | 2027.7 | 2206.5 | 993.6  | 2133.3 | 2266.2 | 0.0872 | 0.9936 |
| hsa-miR-30e-5p  | 2526.1 | 3822.3 | 267.36 | 2080.4 | 581.17 | 2161.3 | 2823.7 | 743.47 | 2237.1 | 870.84 | 221.53 | 3215.1 | 2689   | 134.18 | 906.59 | 3088.7 | 4218.2 | 2505.4 | 1756   | 591.21 | 1811.4 | 1932.6 | 0.0935 | 0.9939 |
| hsa-miR-183-5p  | 545.88 | 473.71 | 29.11  | 526.62 | 772.02 | 547.79 | 400.67 | 153.89 | 275.68 | 132.69 | 243.29 | 434.83 | 310.06 | 78.89  | 193.5  | 472.78 | 755.6  | 800.94 | 492.44 | 175.13 | 385.81 | 395.75 | 0.0367 | 0.9975 |
| hsa-miR-3151-5p | 0.38   | 0.35   | 0      | 0.57   | 0      | 0      | 0      | 1.6    | 0      | 0      | 0      | 0      | 0      | 0      | 0      | 0      | 0.44   | 0.45   | 0      | 2.38   | 0.29   | 0.327  | 0.1732 | 1      |
| hsa-miR-3155a   | 1.53   | 0      | 0      | 0      | 0      | 0.49   | 0.28   | 0.8    | 0.62   | 0      | 1.98   | 0.53   | 0.6    | 1.24   | 0      | 0.47   | 0      | 0      | 0      | 0      | 0.372  | 0.482  | 0.3737 | 1      |

|                  |      |      |      |      |      |      |      |     |      |      |      |      |      |   |      |      |      |      |      |     |       |       |        |   |
|------------------|------|------|------|------|------|------|------|-----|------|------|------|------|------|---|------|------|------|------|------|-----|-------|-------|--------|---|
| hsa-miR-511-3p   | 0.38 | 0.35 | 0    | 0.57 | 0    | 0    | 0    | 0.8 | 0    | 0    | 0    | 1.06 | 0    | 0 | 0    | 0.47 | 0.44 | 0.3  | 0.36 | 0   | 0.21  | 0.263 | 0.3247 | 1 |
| hsa-miR-548ab    | 0    | 1.04 | 0.59 | 0.29 | 0    | 0.98 | 0.57 | 1.6 | 0.62 | 0    | 0    | 1.59 | 1.19 | 0 | 0    | 1.88 | 0.88 | 0.15 | 0    | 0   | 0.569 | 0.569 | 0      | 1 |
| hsa-miR-4659b-5p | 0.76 | 0    | 0    | 0.29 | 1.43 | 0.49 | 0    | 0   | 0    | 0.49 | 1.98 | 0    | 0.6  | 0 | 0    | 0.24 | 1.33 | 0.9  | 0    | 0   | 0.346 | 0.505 | 0.5455 | 1 |
| hsa-miR-629-3p   | 0.38 | 1.04 | 0    | 1.72 | 2.87 | 1.96 | 0.28 | 0   | 0    | 0.98 | 3.96 | 0    | 0    | 0 | 1.96 | 0.47 | 1.77 | 2.54 | 1.43 | 0   | 0.923 | 1.213 | 0.3942 | 1 |
| hsa-miR-6879-3p  | 0    | 0    | 0    | 0.29 | 0    | 0    | 0    | 0.8 | 0    | 0    | 0    | 0    | 0    | 0 | 0    | 0    | 0    | 0    | 0.72 | 0   | 0.109 | 0.072 | -0.598 | 1 |
| hsa-miR-4796-5p  | 0.38 | 0    | 0    | 0    | 0    | 0    | 0.28 | 0   | 0    | 0    | 0    | 0    | 0    | 0 | 0    | 0    | 0.44 | 0    | 0    | 0   | 0.066 | 0.044 | -0.585 | 1 |
| hsa-miR-6866-3p  | 0    | 0    | 0    | 0    | 0    | 0    | 0.57 | 0   | 0.62 | 0    | 0    | 1.06 | 0    | 0 | 0    | 0    | 0    | 0    | 0    | 0   | 0.119 | 0.106 | -0.167 | 1 |
| hsa-miR-1827     | 1.15 | 0.69 | 0    | 0.57 | 0    | 0.98 | 0    | 0   | 0    | 0    | 0    | 1.06 | 0    | 0 | 0    | 0.47 | 0    | 0.75 | 0.36 | 0.3 | 0.339 | 0.294 | -0.206 | 1 |
| hsa-miR-4425     | 0.76 | 0.69 | 0    | 0    | 0    | 1.47 | 0.28 | 1.2 | 0.62 | 0    | 1.98 | 1.59 | 1.79 | 0 | 0    | 0.24 | 0    | 0.75 | 0    | 0   | 0.502 | 0.635 | 0.3391 | 1 |
| hsa-miR-5004-5p  | 0.38 | 0.35 | 0    | 0    | 0    | 0    | 0    | 0   | 0    | 0    | 0    | 0    | 0    | 0 | 0    | 0.24 | 0    | 0    | 0.72 | 0   | 0.073 | 0.096 | 0.3951 | 1 |
| hsa-miR-1911-5p  | 0    | 0    | 0    | 0    | 0    | 0    | 0.57 | 0   | 0    | 0    | 0    | 0    | 0    | 0 | 0    | 0    | 0    | 0.3  | 0    | 0   | 0.057 | 0.03  | -0.926 | 1 |
| hsa-miR-6860     | 0.38 | 0    | 0    | 0    | 0    | 0    | 0    | 0   | 0    | 0    | 0    | 0    | 0.6  | 0 | 0    | 0.24 | 0    | 0    | 0    | 0   | 0.038 | 0.084 | 1.1444 | 1 |
| hsa-miR-4749-3p  | 0    | 0    | 0    | 0    | 0    | 0    | 0    | 0.8 | 0    | 0    | 0    | 0    | 0    | 0 | 0    | 0    | 0    | 0.45 | 0    | 0   | 0.08  | 0.045 | -0.83  | 1 |
| hsa-miR-6757-5p  | 0.38 | 0    | 0    | 0    | 0    | 0    | 0    | 0   | 0    | 0    | 0    | 0    | 0    | 0 | 0    | 0    | 0    | 0    | 0.72 | 0   | 0.038 | 0.072 | 0.922  | 1 |
| hsa-miR-3129-5p  | 0    | 0.69 | 0    | 0    | 0    | 0    | 0    | 0   | 0    | 0    | 0    | 0    | 0    | 0 | 0    | 0    | 0    | 0.45 | 0    | 0   | 0.069 | 0.045 | -0.617 | 1 |
| hsa-miR-548ah-5p | 0    | 0    | 0    | 0    | 0    | 0    | 0    | 0.8 | 0.62 | 0    | 0    | 0    | 0    | 0 | 0    | 0    | 0.44 | 0.3  | 0    | 0   | 0.142 | 0.074 | -0.94  | 1 |
| hsa-miR-548as-5p | 0    | 1.04 | 0    | 0    | 0    | 0    | 0    | 0   | 0    | 0    | 0    | 0    | 0    | 0 | 0    | 0.47 | 0.44 | 0.15 | 0    | 0   | 0.104 | 0.106 | 0.0275 | 1 |
| hsa-miR-590-3p   | 0.76 | 2.77 | 0    | 0.29 | 0    | 0    | 0    | 0   | 0    | 0    | 0    | 1.06 | 0    | 0 | 0    | 0.24 | 0.44 | 0.6  | 1.43 | 0   | 0.382 | 0.377 | -0.019 | 1 |
| hsa-miR-4744     | 0    | 0    | 0    | 0.57 | 0    | 0    | 0    | 0   | 0    | 0    | 0    | 0    | 0    | 0 | 0    | 0.47 | 0    | 0    | 0    | 0   | 0.057 | 0.047 | -0.278 | 1 |
| hsa-miR-592      | 0    | 0.35 | 0    | 0    | 0    | 0    | 0    | 0   | 0    | 0    | 0    | 0    | 0    | 0 | 0    | 0    | 0    | 0.9  | 0    | 0   | 0.035 | 0.09  | 1.3626 | 1 |

|                   |      |      |      |      |      |      |      |     |      |      |      |      |      |      |      |      |      |      |      |      |       |       |        |   |
|-------------------|------|------|------|------|------|------|------|-----|------|------|------|------|------|------|------|------|------|------|------|------|-------|-------|--------|---|
| hsa-miR-548e-5p   | 0    | 0.35 | 0    | 0    | 0    | 0    | 0    | 1.2 | 0    | 0.49 | 0    | 0    | 0    | 0    | 0    | 0.47 | 0    | 0    | 0    | 1.19 | 0.204 | 0.166 | -0.297 | 1 |
| hsa-miR-548n      | 0    | 0    | 0.59 | 0.57 | 0    | 0.98 | 0    | 0   | 0    | 0    | 0    | 1.06 | 0    | 0    | 0    | 1.18 | 0.44 | 0.45 | 0    | 0    | 0.214 | 0.313 | 0.5486 | 1 |
| hsa-miR-4684-3p   | 0    | 0    | 0.89 | 0    | 0    | 0    | 0    | 0   | 0    | 0    | 0    | 0    | 0    | 0    | 0    | 0.47 | 0    | 0    | 0    | 0    | 0.089 | 0.047 | -0.921 | 1 |
| hsa-miR-5696      | 0    | 0    | 0    | 0    | 0    | 0    | 0    | 0   | 0.62 | 0    | 0    | 0    | 0    | 0    | 0    | 0    | 0    | 0.6  | 0    | 0    | 0.062 | 0.06  | -0.047 | 1 |
| hsa-miR-4523      | 0    | 0    | 0    | 0    | 0    | 0    | 0.28 | 0   | 0    | 0    | 0    | 0    | 0    | 0    | 0    | 0    | 0    | 0.6  | 0    | 0    | 0.028 | 0.06  | 1.0995 | 1 |
| hsa-miR-3938      | 0    | 0    | 0    | 0    | 0    | 0.49 | 0    | 0   | 0    | 0    | 0    | 0    | 0    | 0    | 0    | 0    | 0.88 | 0    | 0    | 0    | 0.049 | 0.088 | 0.8447 | 1 |
| hsa-miR-6825-3p   | 0    | 0    | 0    | 0    | 0    | 0    | 0    | 0.4 | 0    | 0    | 0    | 1.06 | 0    | 0    | 0    | 0    | 0    | 0    | 0    | 0    | 0.04  | 0.106 | 1.406  | 1 |
| hsa-miR-4520-5p   | 0    | 0    | 0    | 0    | 0    | 0    | 0.56 | 0   | 0    | 0    | 0    | 0    | 0    | 0    | 0    | 0    | 0.88 | 0    | 0    | 0    | 0.056 | 0.088 | 0.6521 | 1 |
| hsa-miR-187-3p    | 1.15 | 1.04 | 3.86 | 0.86 | 0    | 1.47 | 0.85 | 1.2 | 0    | 0.98 | 5.93 | 0    | 1.19 | 0    | 0    | 0.47 | 0.44 | 1.35 | 0    | 7.74 | 1.141 | 1.712 | 0.5854 | 1 |
| hsa-miR-6727-3p   | 0    | 0    | 0    | 0    | 0    | 0    | 0.28 | 0.4 | 0    | 0    | 0    | 0    | 0    | 0    | 0    | 0.24 | 0    | 0    | 0    | 0    | 0.068 | 0.024 | -1.503 | 1 |
| hsa-miR-3944-3p   | 0.76 | 0    | 0    | 1.15 | 0    | 0.98 | 0.57 | 0   | 1.24 | 0.98 | 0    | 0.53 | 0.6  | 0    | 0.98 | 0.24 | 0    | 0.15 | 0.36 | 3.87 | 0.568 | 0.673 | 0.2447 | 1 |
| hsa-miR-6864-5p   | 0.38 | 0    | 0    | 0    | 0    | 0    | 0    | 0   | 0    | 0    | 0    | 0    | 0    | 0    | 0    | 0    | 0    | 0.6  | 0    | 0    | 0.038 | 0.06  | 0.659  | 1 |
| hsa-miR-4753-5p   | 0.76 | 0.69 | 0    | 0.57 | 2.87 | 3.91 | 1.42 | 0.8 | 1.86 | 0    | 3.96 | 1.59 | 0.6  | 0    | 0.98 | 0.94 | 1.77 | 1.64 | 1.08 | 2.08 | 1.288 | 1.464 | 0.1848 | 1 |
| hsa-miR-1277-5p   | 1.15 | 1.04 | 0    | 0.57 | 0    | 1.47 | 1.42 | 0   | 0.62 | 0    | 0    | 1.06 | 0.6  | 0    | 0    | 0.71 | 2.65 | 2.24 | 0    | 0    | 0.627 | 0.726 | 0.2115 | 1 |
| hsa-miR-181b-2-3p | 0.38 | 0    | 0    | 0.86 | 0    | 0    | 0    | 0   | 1.24 | 0    | 0    | 0    | 0.6  | 0.62 | 0    | 0.24 | 0.44 | 0.9  | 0    | 0.6  | 0.248 | 0.34  | 0.4552 | 1 |
| hsa-miR-211-5p    | 0    | 0.35 | 0    | 0.57 | 0    | 0    | 0.57 | 0   | 0    | 0    | 0    | 0    | 0    | 0    | 0    | 0    | 0.44 | 0.75 | 0    | 0    | 0.149 | 0.119 | -0.324 | 1 |
| hsa-miR-548at-5p  | 0    | 0    | 0    | 0    | 0    | 0.49 | 0.28 | 0   | 0    | 0    | 0    | 0    | 1.19 | 0    | 0    | 0.24 | 0    | 0    | 0    | 0    | 0.077 | 0.143 | 0.8931 | 1 |
| hsa-miR-6881-3p   | 0    | 0.35 | 0    | 0    | 0    | 1.47 | 0.28 | 0   | 0    | 0    | 0    | 0    | 0.6  | 0    | 0    | 0    | 0    | 0    | 1.08 | 0    | 0.21  | 0.168 | -0.322 | 1 |
| hsa-miR-676-5p    | 0    | 0    | 0    | 0    | 0    | 0    | 0    | 0   | 0.62 | 0    | 0    | 0    | 0    | 0    | 0    | 0.47 | 0    | 0    | 0    | 0    | 0.062 | 0.047 | -0.4   | 1 |
| hsa-miR-4776-5p   | 0.38 | 0    | 0    | 0    | 0    | 0    | 0    | 0   | 0    | 0    | 0    | 0    | 0    | 0    | 0    | 0.24 | 0    | 0.15 | 0    | 0.3  | 0.038 | 0.069 | 0.8606 | 1 |

|                 |       |      |      |      |       |       |      |       |      |      |       |      |      |       |       |      |      |       |      |       |       |        |        |   |
|-----------------|-------|------|------|------|-------|-------|------|-------|------|------|-------|------|------|-------|-------|------|------|-------|------|-------|-------|--------|--------|---|
| hsa-miR-132-5p  | 11.09 | 9.35 | 9.21 | 8.04 | 10.04 | 14.18 | 9.65 | 16.39 | 6.83 | 2.46 | 23.74 | 9.01 | 4.78 | 10.56 | 14.73 | 11.3 | 6.19 | 16.75 | 3.95 | 18.47 | 9.724 | 11.948 | 0.2971 | 1 |
| hsa-miR-6764-3p | 0     | 0    | 0    | 0    | 0     | 0.49  | 0    | 0     | 0    | 0    | 0     | 0    | 0    | 0     | 0     | 0    | 0    | 0.6   | 0    | 0     | 0.049 | 0.06   | 0.2922 | 1 |
| hsa-miR-5582-3p | 0.38  | 0.35 | 0    | 1.43 | 0     | 0     | 0.28 | 0     | 0    | 0    | 0     | 0.53 | 0    | 0     | 0     | 0.47 | 0    | 0.6   | 1.08 | 0     | 0.244 | 0.268  | 0.1354 | 1 |
| hsa-miR-762     | 0     | 0    | 0    | 0    | 0     | 0     | 0    | 0.4   | 0    | 0    | 0     | 0    | 0    | 0     | 0     | 0    | 0    | 0.15  | 0    | 0     | 0.04  | 0.015  | -1.415 | 1 |
| hsa-miR-675-5p  | 0.38  | 0.35 | 1.19 | 0    | 0     | 1.47  | 1.14 | 0     | 0.62 | 0.98 | 0     | 0.53 | 1.79 | 0.62  | 0     | 0.47 | 0.88 | 1.05  | 0    | 2.08  | 0.613 | 0.742  | 0.2755 | 1 |
| hsa-miR-4753-3p | 0     | 1.04 | 0    | 0    | 0     | 0     | 0    | 0     | 0    | 0.49 | 0     | 0.53 | 0    | 0     | 0     | 0.47 | 0.44 | 0.45  | 0    | 0     | 0.153 | 0.189  | 0.3049 | 1 |
| hsa-miR-374b-3p | 0     | 0.35 | 0    | 0    | 0     | 0     | 0    | 0     | 0    | 0    | 0     | 0    | 0    | 0     | 0     | 0    | 0.88 | 0.15  | 0    | 0     | 0.035 | 0.103  | 1.5572 | 1 |
| hsa-miR-6855-3p | 0     | 0.35 | 0    | 0.86 | 0     | 0.98  | 0.28 | 0     | 0.62 | 0.49 | 0     | 0.53 | 0    | 0     | 0     | 0    | 0.88 | 0.9   | 1.08 | 0     | 0.358 | 0.339  | -0.079 | 1 |
| hsa-let-7c-3p   | 0     | 0    | 0    | 0    | 0     | 0.49  | 0    | 0     | 0    | 0    | 0     | 0    | 0    | 0     | 0     | 0    | 0    | 0     | 0.36 | 0     | 0.049 | 0.036  | -0.445 | 1 |
| hsa-miR-4762-3p | 1.53  | 1.39 | 0.59 | 2.87 | 0     | 0     | 2.56 | 4     | 0    | 0    | 7.91  | 0.53 | 0    | 2.48  | 3.93  | 2.59 | 0.44 | 1.05  | 0    | 0.3   | 1.294 | 1.923  | 0.5715 | 1 |
| hsa-miR-5587-5p | 0.76  | 0    | 0    | 0    | 0     | 0     | 0    | 0     | 0    | 0    | 0     | 0    | 0    | 0     | 0     | 0    | 0.44 | 0.3   | 0    | 0     | 0.076 | 0.074  | -0.039 | 1 |
| hsa-miR-548t-5p | 0     | 0    | 0.89 | 0    | 0     | 0     | 0.28 | 1.2   | 0.62 | 0.49 | 0     | 1.06 | 0.6  | 0     | 0     | 0.24 | 0.44 | 0.45  | 0    | 1.19  | 0.348 | 0.398  | 0.1937 | 1 |
| hsa-miR-4796-3p | 0     | 0.35 | 0    | 0    | 0     | 0     | 0    | 0     | 0    | 0    | 0     | 0    | 0    | 0     | 0     | 0.24 | 0    | 0.15  | 0    | 0     | 0.035 | 0.039  | 0.1561 | 1 |
| hsa-miR-508-3p  | 0     | 0    | 0    | 0    | 0     | 0     | 0.28 | 0     | 0    | 0    | 0     | 0.53 | 0    | 0     | 0     | 0    | 0    | 0.45  | 0    | 0     | 0.028 | 0.098  | 1.8074 | 1 |
| hsa-miR-3117-3p | 0.76  | 0.35 | 0    | 0    | 0     | 0     | 0    | 0     | 0    | 0    | 0     | 0    | 0    | 0     | 0     | 0.24 | 0    | 0.15  | 0.72 | 0     | 0.111 | 0.111  | 0      | 1 |
| hsa-miR-4301    | 0.38  | 0    | 0    | 0    | 0     | 0     | 0.28 | 0     | 0    | 0    | 0     | 0    | 0    | 0     | 0     | 0    | 0    | 0.45  | 0.72 | 0     | 0.066 | 0.117  | 0.826  | 1 |
| hsa-miR-6716-3p | 0.38  | 0    | 0    | 0.57 | 0     | 1.47  | 0.57 | 0     | 0    | 0.49 | 0     | 1.06 | 0    | 0     | 1.96  | 0.24 | 1.77 | 0     | 0    | 0     | 0.348 | 0.503  | 0.5315 | 1 |
| hsa-miR-3652    | 0     | 0.35 | 0    | 0.57 | 0     | 0     | 0    | 0     | 0    | 0    | 0     | 0    | 0    | 0     | 0     | 0    | 0    | 1.05  | 0    | 0     | 0.092 | 0.105  | 0.1907 | 1 |
| hsa-miR-6798-5p | 0     | 0    | 0    | 0    | 0     | 0     | 0.28 | 0     | 0    | 0    | 0     | 0.53 | 0    | 0     | 0     | 0    | 0    | 0     | 0    | 0     | 0.028 | 0.053  | 0.9206 | 1 |
| hsa-miR-497-5p  | 0.76  | 2.42 | 3.27 | 0.29 | 0     | 0.49  | 0.85 | 0.8   | 0    | 0    | 0     | 1.59 | 1.79 | 0     | 1.96  | 1.88 | 1.33 | 0.45  | 0    | 0     | 0.888 | 0.9    | 0.0194 | 1 |

|                   |      |       |      |      |   |      |      |     |      |      |      |      |      |      |      |      |       |      |      |     |       |       |        |   |
|-------------------|------|-------|------|------|---|------|------|-----|------|------|------|------|------|------|------|------|-------|------|------|-----|-------|-------|--------|---|
| hsa-miR-4758-3p   | 0    | 0     | 0    | 0.29 | 0 | 0.98 | 0.28 | 0   | 0    | 0    | 0    | 0    | 0    | 1.24 | 0    | 0.24 | 0     | 0    | 0    | 0   | 0.155 | 0.148 | -0.067 | 1 |
| hsa-miR-548i      | 0.38 | 0.35  | 0    | 0    | 0 | 0    | 0    | 0   | 0    | 0    | 0    | 0    | 0    | 0    | 0    | 0    | 0.88  | 0.15 | 0    | 0   | 0.073 | 0.103 | 0.4967 | 1 |
| hsa-miR-1233-5p   | 0    | 0.35  | 0    | 0    | 0 | 0    | 0    | 0   | 0    | 0    | 0    | 0    | 0    | 0    | 0    | 0.24 | 0     | 0.15 | 0    | 0   | 0.035 | 0.039 | 0.1561 | 1 |
| hsa-let-7f-1-3p   | 6.88 | 19.05 | 0    | 5.17 | 0 | 9.29 | 6.53 | 0   | 4.35 | 0.98 | 3.96 | 2.12 | 0    | 0.62 | 3.93 | 6.12 | 23.45 | 8.22 | 8.61 | 0   | 5.225 | 5.703 | 0.1263 | 1 |
| hsa-miR-3910      | 0.38 | 0     | 0    | 0    | 0 | 0    | 0    | 0   | 0    | 0    | 0    | 0.53 | 0    | 0    | 0    | 0    | 0     | 0    | 0    | 0   | 0.038 | 0.053 | 0.48   | 1 |
| hsa-miR-549a      | 0.76 | 0     | 0    | 0    | 0 | 0    | 0    | 0   | 0    | 0    | 0    | 0    | 0    | 0    | 0    | 0    | 0.88  | 0    | 0    | 0   | 0.076 | 0.088 | 0.2115 | 1 |
| hsa-miR-450a-1-3p | 0    | 0.35  | 0    | 0.29 | 0 | 0    | 0    | 0   | 0    | 0    | 0    | 0    | 0    | 0    | 0    | 0    | 0.88  | 0    | 0    | 0.3 | 0.064 | 0.118 | 0.8826 | 1 |
| hsa-miR-496       | 0    | 3.12  | 0    | 0    | 0 | 0    | 0    | 0   | 0    | 0.49 | 3.96 | 0.53 | 0    | 0    | 0    | 0.24 | 0.88  | 0.45 | 0.36 | 0   | 0.361 | 0.642 | 0.8306 | 1 |
| hsa-miR-15a-3p    | 0    | 0     | 0    | 0    | 0 | 0    | 0.28 | 0   | 0    | 0    | 0    | 0    | 0    | 0    | 0    | 0.47 | 0     | 0    | 0    | 0   | 0.028 | 0.047 | 0.7472 | 1 |
| hsa-miR-3687      | 0    | 0     | 0    | 0.86 | 0 | 0.49 | 0    | 0   | 0.62 | 0.98 | 0    | 0    | 1.79 | 0    | 0    | 1.18 | 0     | 0.3  | 0.36 | 0   | 0.295 | 0.363 | 0.2993 | 1 |
| hsa-miR-6810-3p   | 0    | 0     | 0    | 0    | 0 | 0.49 | 0    | 0   | 0    | 0    | 0    | 0    | 0    | 0    | 0    | 0.24 | 0     | 0    | 0    | 0   | 0.049 | 0.024 | -1.03  | 1 |
| hsa-miR-6788-5p   | 0.38 | 0     | 0    | 0    | 0 | 0    | 0    | 0   | 0    | 0    | 0    | 0    | 0    | 0    | 0    | 0    | 0.44  | 0    | 0    | 0   | 0.038 | 0.044 | 0.2115 | 1 |
| hsa-miR-6089      | 0    | 0     | 0    | 0.29 | 0 | 0.49 | 0    | 0   | 0    | 0    | 0    | 0    | 0    | 0.62 | 0    | 0    | 0     | 0    | 0    | 0   | 0.078 | 0.062 | -0.331 | 1 |
| hsa-miR-6885-3p   | 1.15 | 0     | 0    | 0    | 0 | 0.98 | 0.28 | 0   | 0    | 0    | 0    | 0    | 0    | 0    | 0    | 0.47 | 0.44  | 0    | 0.72 | 0   | 0.241 | 0.163 | -0.564 | 1 |
| hsa-miR-6125      | 0    | 0     | 0.89 | 0    | 0 | 0.49 | 0    | 0.8 | 0    | 0    | 0    | 0    | 0.6  | 1.86 | 0    | 0    | 0     | 0    | 0    | 0   | 0.218 | 0.246 | 0.1743 | 1 |
| hsa-miR-4723-5p   | 0.76 | 0.35  | 0    | 0.29 | 0 | 1.96 | 0    | 0   | 0    | 0    | 0    | 0    | 0    | 0    | 0    | 0.71 | 0     | 1.05 | 0.72 | 0   | 0.336 | 0.248 | -0.438 | 1 |
| hsa-miR-6871-3p   | 0    | 0     | 0    | 0.29 | 0 | 0    | 0    | 0   | 0    | 0    | 0    | 0    | 0.6  | 0    | 0    | 0    | 0     | 0    | 0    | 0   | 0.029 | 0.06  | 1.0489 | 1 |
| hsa-miR-6833-5p   | 0    | 0     | 0    | 0    | 0 | 0    | 0    | 0.4 | 0    | 0    | 0    | 0.53 | 0    | 0    | 0    | 0    | 0     | 0    | 0    | 0   | 0.04  | 0.053 | 0.406  | 1 |
| hsa-miR-3065-3p   | 0    | 0     | 0    | 0.29 | 0 | 0    | 0    | 0   | 0    | 0    | 0    | 0    | 0    | 0    | 0    | 0    | 0.44  | 0.15 | 0    | 0   | 0.029 | 0.059 | 1.0247 | 1 |
| hsa-miR-3193      | 0    | 0     | 0    | 0    | 0 | 0    | 0.28 | 0   | 0    | 0    | 0    | 0    | 0.6  | 0    | 0    | 0    | 0     | 0    | 0    | 0   | 0.028 | 0.06  | 1.0995 | 1 |

|                 |      |      |      |      |      |      |      |     |      |      |   |      |      |      |      |      |      |      |      |      |       |       |        |   |
|-----------------|------|------|------|------|------|------|------|-----|------|------|---|------|------|------|------|------|------|------|------|------|-------|-------|--------|---|
| hsa-miR-5188    | 0    | 0    | 0    | 0    | 0    | 0.49 | 1.14 | 0   | 0    | 0    | 0 | 0    | 0    | 0    | 0    | 0.47 | 0.88 | 0.3  | 0    | 0    | 0.163 | 0.165 | 0.0176 | 1 |
| hsa-miR-6802-3p | 0    | 0    | 0    | 0    | 0    | 0    | 0    | 0   | 0    | 0.49 | 0 | 0    | 0    | 0    | 0    | 0.24 | 0    | 0.45 | 0    | 0    | 0.049 | 0.069 | 0.4938 | 1 |
| hsa-miR-4707-3p | 1.15 | 3.46 | 0    | 0    | 0    | 2.93 | 0    | 5.6 | 0    | 0    | 0 | 2.12 | 0    | 0    | 7.86 | 3.53 | 0    | 0    | 0    | 0    | 1.314 | 1.351 | 0.0401 | 1 |
| hsa-miR-6805-5p | 0.38 | 1.04 | 3.56 | 2.3  | 0    | 4.4  | 0.57 | 1.2 | 3.1  | 5.41 | 0 | 3.18 | 3.58 | 0.62 | 2.95 | 1.88 | 1.33 | 3.29 | 4.66 | 2.38 | 2.196 | 2.387 | 0.1203 | 1 |
| hsa-miR-664a-3p | 2.68 | 7.62 | 0    | 0.29 | 0    | 2.93 | 0.85 | 0   | 0    | 0    | 0 | 3.71 | 0    | 0    | 0    | 1.18 | 5.31 | 2.84 | 1.79 | 0    | 1.437 | 1.483 | 0.0455 | 1 |
| hsa-miR-6730-3p | 0    | 0.35 | 0    | 0.86 | 0    | 0    | 0.85 | 0   | 0.62 | 0.98 | 0 | 0    | 0    | 0    | 0    | 0.24 | 0.44 | 0.15 | 2.15 | 0    | 0.366 | 0.298 | -0.297 | 1 |
| hsa-miR-6820-5p | 1.15 | 0    | 0    | 0.57 | 0    | 1.96 | 0.28 | 0.8 | 0    | 0.49 | 0 | 0.53 | 0    | 0    | 3.93 | 0    | 0    | 0    | 0    | 2.98 | 0.525 | 0.744 | 0.503  | 1 |
| hsa-miR-216b-5p | 1.53 | 0    | 0    | 1.43 | 0    | 1.47 | 0.57 | 0   | 0    | 0    | 0 | 1.06 | 0    | 0    | 0    | 0.71 | 1.77 | 0.6  | 1.08 | 0    | 0.5   | 0.522 | 0.0621 | 1 |
| hsa-miR-4459    | 0    | 0    | 1.19 | 0    | 0    | 0    | 0    | 0   | 0    | 0    | 0 | 0    | 0    | 0    | 0.98 | 0    | 0    | 0    | 0    | 0.6  | 0.119 | 0.158 | 0.409  | 1 |
| hsa-miR-3139    | 0.38 | 0    | 0    | 0    | 0    | 0    | 0    | 0   | 0    | 0    | 0 | 0    | 0    | 0    | 0    | 0.24 | 0    | 0    | 0    | 0    | 0.038 | 0.024 | -0.663 | 1 |
| hsa-miR-6513-5p | 0.76 | 2.77 | 0.89 | 1.15 | 1.43 | 0.49 | 0.85 | 0   | 0.62 | 0    | 0 | 0    | 1.79 | 0    | 3.93 | 2.59 | 1.33 | 0.75 | 0    | 0    | 0.896 | 1.039 | 0.2136 | 1 |
| hsa-miR-627-3p  | 0.38 | 0.69 | 0    | 1.43 | 0    | 0    | 2.56 | 0.4 | 0.62 | 1.47 | 0 | 2.12 | 1.79 | 0    | 0.98 | 0.71 | 1.33 | 0.3  | 0.72 | 0.3  | 0.755 | 0.825 | 0.1279 | 1 |
| hsa-miR-4714-5p | 0.76 | 0    | 0    | 2.01 | 0    | 0    | 0.85 | 0   | 0.62 | 0    | 0 | 1.59 | 0    | 0    | 0    | 0.71 | 1.33 | 1.5  | 0    | 0    | 0.424 | 0.513 | 0.2749 | 1 |
| hsa-miR-4424    | 0    | 0.69 | 0    | 0    | 0    | 0    | 0    | 0   | 0.62 | 0    | 0 | 0.53 | 0    | 0    | 0    | 0    | 0.44 | 0    | 0    | 0    | 0.131 | 0.097 | -0.434 | 1 |
| hsa-miR-6800-5p | 0    | 0    | 0    | 0    | 0    | 1.96 | 0.28 | 0   | 0    | 0    | 0 | 0    | 0    | 0    | 0    | 0    | 0    | 0    | 1.43 | 0    | 0.224 | 0.143 | -0.648 | 1 |
| hsa-miR-7843-5p | 0.38 | 0    | 0    | 0    | 0    | 0    | 0    | 0   | 0    | 0    | 0 | 0.53 | 0    | 0    | 0    | 0    | 0    | 0    | 0    | 0    | 0.038 | 0.053 | 0.48   | 1 |
| hsa-miR-3191-3p | 1.53 | 0.35 | 1.19 | 0    | 0    | 1.47 | 1.14 | 2   | 1.24 | 0    | 0 | 1.06 | 0    | 0    | 2.95 | 0    | 1.33 | 2.69 | 0    | 2.98 | 0.892 | 1.101 | 0.3037 | 1 |
| hsa-miR-1972    | 0    | 0    | 0    | 0    | 0    | 0    | 0.28 | 0   | 0    | 0    | 0 | 0    | 0.6  | 0    | 0    | 0    | 0    | 0.3  | 0    | 0    | 0.028 | 0.09  | 1.6845 | 1 |
| hsa-miR-4469    | 0    | 0    | 0    | 0    | 0    | 0    | 0    | 0   | 0.62 | 0    | 0 | 0    | 0    | 0    | 0    | 0.24 | 0    | 0    | 0    | 0    | 0.062 | 0.024 | -1.369 | 1 |
| hsa-miR-6509-3p | 0.76 | 0    | 0    | 0    | 0    | 0    | 0    | 0   | 0.62 | 0    | 0 | 0    | 0    | 0    | 0    | 0.47 | 0    | 0.9  | 0    | 0    | 0.138 | 0.137 | -0.011 | 1 |

|                  |      |      |      |      |      |      |      |     |      |      |       |      |      |      |      |      |      |      |      |      |       |       |        |   |
|------------------|------|------|------|------|------|------|------|-----|------|------|-------|------|------|------|------|------|------|------|------|------|-------|-------|--------|---|
| hsa-miR-3667-3p  | 0    | 0    | 0    | 0    | 0    | 0    | 0.28 | 0   | 0    | 0    | 0     | 0    | 0    | 0    | 0    | 0.24 | 0    | 0    | 0    | 0    | 0.028 | 0.024 | -0.222 | 1 |
| hsa-miR-6780b-5p | 0    | 0    | 0    | 0    | 1.43 | 0    | 0    | 0   | 0    | 0    | 0     | 0    | 0    | 0    | 0    | 0.24 | 0.44 | 0    | 0    | 0    | 0.143 | 0.068 | -1.072 | 1 |
| hsa-miR-6516-3p  | 0.76 | 0    | 0    | 0.86 | 0    | 0    | 0.85 | 0   | 1.24 | 0    | 0     | 1.06 | 0.6  | 0    | 0    | 0    | 1.77 | 0.6  | 0.72 | 0    | 0.371 | 0.475 | 0.3565 | 1 |
| hsa-miR-6809-3p  | 0    | 0    | 0    | 0    | 0    | 0    | 0.57 | 0   | 0    | 0    | 0     | 0    | 0    | 0    | 0    | 0    | 0    | 0    | 0.36 | 0    | 0.057 | 0.036 | -0.663 | 1 |
| hsa-miR-4677-5p  | 0    | 1.04 | 0    | 0.29 | 0    | 0    | 0    | 0   | 0    | 0    | 0     | 0.53 | 0    | 0    | 0    | 0.24 | 0.44 | 0    | 0    | 0    | 0.133 | 0.121 | -0.136 | 1 |
| hsa-miR-299-3p   | 0.76 | 1.04 | 0    | 0    | 0    | 0    | 0.57 | 0   | 0    | 0    | 0     | 0    | 0.6  | 0    | 0.98 | 0.94 | 0    | 0.45 | 0    | 0    | 0.237 | 0.297 | 0.3256 | 1 |
| hsa-miR-329-5p   | 0    | 0    | 0    | 0    | 0    | 1.47 | 0.57 | 0   | 0    | 0.49 | 0     | 1.06 | 0    | 0    | 0    | 0.24 | 0    | 1.2  | 0    | 0    | 0.253 | 0.25  | -0.017 | 1 |
| hsa-miR-4721     | 0.38 | 0    | 0    | 0.29 | 0    | 0    | 0    | 2.4 | 0    | 0    | 0     | 0    | 0.6  | 0    | 0.98 | 0.24 | 0.44 | 0    | 0.36 | 0.3  | 0.307 | 0.292 | -0.072 | 1 |
| hsa-miR-4757-5p  | 0    | 0    | 0    | 0.29 | 0    | 0.49 | 0    | 0   | 0    | 0    | 0     | 0    | 0    | 0    | 0    | 0    | 0    | 0.45 | 0    | 0    | 0.078 | 0.045 | -0.794 | 1 |
| hsa-miR-3609     | 0.76 | 0.35 | 0.89 | 0    | 0    | 0    | 0    | 0   | 0    | 0    | 0     | 0    | 1.79 | 0    | 0    | 0    | 0    | 0    | 0    | 0    | 0.2   | 0.179 | -0.16  | 1 |
| hsa-miR-6799-3p  | 0    | 0.35 | 0    | 0    | 0    | 0    | 0    | 0   | 0    | 0    | 0     | 0    | 0    | 0    | 0    | 0.24 | 0.44 | 0.15 | 0    | 0    | 0.035 | 0.083 | 1.2458 | 1 |
| hsa-miR-548s     | 0    | 0    | 0    | 0    | 0    | 0    | 0.28 | 0   | 0    | 0    | 1.98  | 0    | 0    | 0    | 0    | 0    | 0    | 0    | 0    | 0    | 0.028 | 0.198 | 2.822  | 1 |
| hsa-miR-548ak    | 0.38 | 0.69 | 0    | 0    | 0    | 0.98 | 0.85 | 0   | 0.62 | 0    | 0     | 1.06 | 0.6  | 0    | 0    | 0    | 0.44 | 0    | 1.08 | 0    | 0.352 | 0.318 | -0.147 | 1 |
| hsa-miR-3940-5p  | 0    | 0    | 0.3  | 0.29 | 0    | 0    | 0    | 2   | 0.62 | 0    | 0     | 0    | 0    | 0    | 2.95 | 0    | 0.44 | 0.45 | 0    | 0    | 0.321 | 0.384 | 0.2585 | 1 |
| hsa-miR-6755-5p  | 0    | 0.69 | 0    | 0.57 | 0    | 0    | 0    | 0   | 0    | 0    | 0     | 0    | 0.6  | 0    | 0    | 0.24 | 0.44 | 0    | 0.72 | 0    | 0.126 | 0.2   | 0.6666 | 1 |
| hsa-miR-208a-3p  | 0    | 0    | 0    | 0    | 0    | 0    | 0    | 0   | 0    | 0.98 | 0     | 0    | 0    | 0.62 | 0.98 | 0    | 0    | 0    | 0    | 0    | 0.098 | 0.16  | 0.7072 | 1 |
| hsa-miR-4742-5p  | 0.76 | 0.35 | 0    | 0.29 | 0    | 0.98 | 0    | 0   | 0.62 | 0.98 | 0     | 1.06 | 0    | 0    | 0    | 0.47 | 0.44 | 1.79 | 0.72 | 0    | 0.398 | 0.448 | 0.1707 | 1 |
| hsa-miR-4664-3p  | 4.2  | 0    | 0    | 2.01 | 8.61 | 1.47 | 2.56 | 6   | 0.62 | 2.46 | 15.82 | 1.06 | 4.18 | 3.11 | 0.98 | 2.35 | 3.1  | 1.2  | 0.36 | 4.17 | 2.793 | 3.633 | 0.3793 | 1 |
| hsa-miR-4779     | 0    | 0.35 | 0    | 0    | 0    | 0    | 0    | 0   | 0    | 0    | 0     | 0    | 0    | 0    | 0    | 0.24 | 0    | 0.3  | 0    | 0    | 0.035 | 0.054 | 0.6256 | 1 |
| hsa-miR-1247-3p  | 0    | 0    | 0.59 | 0    | 5.74 | 0    | 0.28 | 0.4 | 0    | 0    | 0     | 0    | 0    | 0    | 0.98 | 0    | 0    | 0    | 0    | 5.36 | 0.701 | 0.634 | -0.145 | 1 |

|                  |      |      |       |      |      |      |      |       |      |      |       |      |      |      |       |      |      |      |      |       |       |       |        |   |
|------------------|------|------|-------|------|------|------|------|-------|------|------|-------|------|------|------|-------|------|------|------|------|-------|-------|-------|--------|---|
| hsa-miR-186-3p   | 0    | 0.69 | 0     | 0    | 0    | 0.49 | 0    | 0     | 0    | 0    | 0     | 0    | 0.6  | 0    | 0     | 0.24 | 0    | 0.15 | 0    | 0     | 0.118 | 0.099 | -0.253 | 1 |
| hsa-miR-6785-5p  | 0    | 0    | 0     | 0    | 0    | 0    | 0.57 | 0.8   | 0.62 | 0    | 0     | 0    | 0    | 0    | 0     | 0.24 | 0    | 0.3  | 0.72 | 0     | 0.199 | 0.126 | -0.659 | 1 |
| hsa-miR-216a-3p  | 0    | 0.35 | 0     | 0    | 0    | 0    | 0    | 0     | 0    | 0    | 0     | 0    | 0    | 0    | 0     | 0    | 0.44 | 0    | 0    | 0     | 0.035 | 0.044 | 0.3301 | 1 |
| hsa-miR-4421     | 0    | 0    | 0     | 0    | 0    | 0    | 0    | 0     | 0    | 0.49 | 0     | 0    | 0    | 0    | 0     | 0.24 | 0    | 0    | 0    | 0     | 0.049 | 0.024 | -1.03  | 1 |
| hsa-miR-3064-3p  | 0    | 0.69 | 0     | 0.29 | 0    | 0    | 0    | 0     | 0    | 0    | 0     | 1.06 | 0    | 0    | 0     | 0    | 0.44 | 0    | 0    | 0     | 0.098 | 0.15  | 0.6141 | 1 |
| hsa-miR-216a-5p  | 0    | 0.69 | 0     | 0    | 0    | 0    | 0    | 0     | 0    | 0    | 0     | 0    | 0    | 0    | 0     | 0    | 0    | 0    | 0.36 | 0     | 0.069 | 0.036 | -0.939 | 1 |
| hsa-miR-548al    | 0    | 0    | 0     | 0    | 0    | 0    | 0    | 1.6   | 0    | 0    | 0     | 0.53 | 0    | 0    | 0     | 0    | 0    | 0.3  | 0    | 0     | 0.16  | 0.083 | -0.947 | 1 |
| hsa-miR-3916     | 0    | 0    | 0     | 0    | 0    | 0    | 0    | 1.2   | 0    | 0    | 0     | 0.53 | 0    | 0    | 0     | 0    | 0.44 | 0    | 0    | 0     | 0.12  | 0.097 | -0.307 | 1 |
| hsa-miR-6791-3p  | 0    | 0    | 0     | 0    | 0    | 0    | 0.28 | 0     | 0    | 0    | 0     | 0    | 0    | 0    | 0     | 0    | 0    | 0.45 | 0    | 0     | 0.028 | 0.045 | 0.6845 | 1 |
| hsa-miR-6788-3p  | 0    | 0    | 0     | 0.29 | 0    | 0    | 0    | 0     | 0    | 0    | 0     | 0    | 0    | 0    | 0     | 0    | 0    | 0    | 0.36 | 0     | 0.029 | 0.036 | 0.3119 | 1 |
| hsa-miR-487b-5p  | 0    | 0    | 0     | 0.57 | 0    | 0    | 0.28 | 0     | 0    | 0    | 0     | 0.53 | 0    | 0    | 0     | 0    | 0    | 0.75 | 0    | 0     | 0.085 | 0.128 | 0.5906 | 1 |
| hsa-miR-217      | 0.38 | 0    | 0     | 0    | 0    | 0.49 | 1.42 | 0     | 0.62 | 0    | 0     | 0    | 0    | 0    | 0     | 0.24 | 1.33 | 0    | 0.72 | 0     | 0.291 | 0.229 | -0.346 | 1 |
| hsa-miR-1266-5p  | 0    | 1.04 | 0     | 0    | 0    | 0    | 0.28 | 0     | 1.24 | 0    | 0     | 2.65 | 0    | 0    | 0     | 0    | 0.44 | 0    | 0    | 0     | 0.256 | 0.309 | 0.2715 | 1 |
| hsa-miR-6780a-5p | 1.53 | 2.08 | 12.77 | 3.16 | 2.87 | 2.45 | 3.12 | 19.19 | 0.62 | 1.97 | 13.85 | 4.77 | 5.38 | 5.59 | 17.68 | 3.53 | 0.88 | 0.75 | 0.72 | 10.42 | 4.976 | 6.357 | 0.3534 | 1 |
| hsa-miR-6766-3p  | 0    | 0.35 | 0     | 0    | 0    | 0    | 0    | 0     | 0    | 0    | 0     | 0    | 0    | 0    | 0     | 0    | 0    | 0.3  | 0    | 0     | 0.035 | 0.03  | -0.222 | 1 |
| hsa-miR-1273e    | 0    | 0.35 | 3.27  | 0.57 | 0    | 0    | 0.28 | 2     | 1.24 | 0.98 | 0     | 2.12 | 0.6  | 1.86 | 0.98  | 0.71 | 0    | 0.6  | 0    | 3.57  | 0.869 | 1.044 | 0.2647 | 1 |
| hsa-miR-5571-3p  | 0.76 | 0.35 | 0     | 0    | 0    | 0    | 0.28 | 0     | 0    | 0    | 0     | 0    | 0    | 0    | 0     | 0    | 0    | 0    | 0.72 | 0     | 0.139 | 0.072 | -0.949 | 1 |
| hsa-miR-6793-5p  | 0.38 | 1.73 | 2.08  | 1.15 | 1.43 | 0.98 | 0.57 | 0.8   | 0    | 0    | 5.93  | 0.53 | 1.19 | 1.24 | 0     | 0.94 | 1.33 | 1.5  | 0    | 0.89  | 0.912 | 1.355 | 0.5712 | 1 |
| hsa-miR-1234-3p  | 1.15 | 1.04 | 0.59  | 0.57 | 4.3  | 3.42 | 0.85 | 0     | 0    | 0.49 | 0     | 1.59 | 1.19 | 0    | 0     | 1.88 | 0.44 | 1.35 | 0.72 | 3.87  | 1.241 | 1.104 | -0.169 | 1 |
| hsa-miR-4503     | 0.38 | 0.69 | 0     | 0    | 0    | 0.98 | 0    | 0     | 0.62 | 0    | 0     | 0    | 0    | 0    | 0     | 0.71 | 0.88 | 1.35 | 0    | 0     | 0.267 | 0.294 | 0.139  | 1 |

|                 |       |      |       |      |      |      |       |       |      |       |      |      |      |      |      |      |      |       |       |       |       |       |        |   |
|-----------------|-------|------|-------|------|------|------|-------|-------|------|-------|------|------|------|------|------|------|------|-------|-------|-------|-------|-------|--------|---|
| hsa-miR-203b-3p | 0     | 0    | 0     | 0    | 0    | 0    | 0     | 0     | 0.62 | 0     | 0    | 0.53 | 0    | 0    | 0    | 0    | 0    | 0.9   | 0     | 0     | 0.062 | 0.143 | 1.2057 | 1 |
| hsa-miR-5684    | 0.76  | 0    | 0     | 0    | 0    | 0    | 0     | 0     | 0    | 0     | 0    | 0    | 0    | 0    | 0    | 0    | 0    | 0     | 0.36  | 0     | 0.076 | 0.036 | -1.078 | 1 |
| hsa-miR-3591-5p | 0     | 0    | 0     | 0    | 0    | 0.49 | 0     | 0     | 0    | 0.98  | 0    | 0.53 | 0    | 0    | 0    | 0.24 | 0    | 0     | 0.36  | 0     | 0.147 | 0.113 | -0.38  | 1 |
| hsa-miR-323a-3p | 14.14 | 8.31 | 0     | 7.46 | 2.87 | 8.8  | 11.36 | 0     | 9.31 | 14.74 | 0    | 2.65 | 1.19 | 0    | 4.91 | 9.18 | 11.5 | 11.81 | 29.41 | 0     | 7.699 | 7.065 | -0.124 | 1 |
| hsa-miR-6782-5p | 0     | 0    | 0     | 0.29 | 0    | 0    | 0.28  | 0     | 0    | 0     | 0    | 0    | 0    | 0    | 0    | 0    | 0.44 | 0     | 0.36  | 0     | 0.057 | 0.08  | 0.489  | 1 |
| hsa-miR-3121-3p | 0.38  | 0.69 | 0     | 0.29 | 0    | 0.49 | 0.57  | 0     | 0    | 0     | 0    | 0.53 | 0    | 0    | 0    | 0.24 | 0.44 | 0     | 1.08  | 0     | 0.242 | 0.229 | -0.08  | 1 |
| hsa-miR-4709-3p | 0     | 0    | 0     | 0.57 | 0    | 0    | 0.28  | 0     | 0    | 0     | 0    | 0    | 0.6  | 0    | 0    | 0    | 0.44 | 0.15  | 0     | 0     | 0.085 | 0.119 | 0.4854 | 1 |
| hsa-miR-4632-5p | 0     | 0    | 0     | 0    | 0    | 0    | 0     | 0     | 0.62 | 0     | 0    | 0    | 0    | 0.62 | 0    | 0    | 0    | 0     | 0     | 0     | 0.062 | 0.062 | 0      | 1 |
| hsa-miR-3074-3p | 0     | 0.35 | 0     | 0    | 0    | 0    | 0     | 0     | 0    | 0     | 0    | 0    | 0    | 0    | 0    | 0    | 0    | 0.15  | 0     | 0     | 0.035 | 0.015 | -1.222 | 1 |
| hsa-miR-4757-3p | 0     | 0.35 | 0     | 0.57 | 0    | 0    | 0     | 0     | 0    | 0     | 0    | 1.06 | 0    | 0    | 0    | 0.47 | 0    | 0     | 0     | 0     | 0.092 | 0.153 | 0.7338 | 1 |
| hsa-miR-4786-5p | 1.91  | 0.35 | 0     | 0    | 2.87 | 0.98 | 0.57  | 0     | 0    | 0     | 1.98 | 1.06 | 1.19 | 0    | 1.96 | 0.24 | 0    | 0     | 0     | 0     | 0.668 | 0.643 | -0.055 | 1 |
| hsa-miR-1197    | 0     | 0.69 | 0     | 0.29 | 0    | 0    | 0.28  | 0     | 0.62 | 0     | 0    | 1.06 | 0    | 0    | 0    | 0    | 0    | 0     | 0.72  | 0     | 0.188 | 0.178 | -0.079 | 1 |
| hsa-miR-376a-3p | 0     | 4.84 | 2.38  | 0    | 0    | 0.98 | 0     | 0     | 3.72 | 0     | 0    | 0    | 0    | 0    | 5.9  | 0.94 | 0.88 | 2.4   | 2.86  | 0     | 1.192 | 1.298 | 0.1229 | 1 |
| hsa-miR-212-3p  | 0.38  | 0.35 | 0     | 0    | 0    | 0.49 | 0     | 0     | 0    | 0     | 0    | 1.59 | 0    | 0    | 0    | 0    | 0    | 0     | 0     | 0     | 0.122 | 0.159 | 0.3821 | 1 |
| hsa-miR-4788    | 1.53  | 0    | 0     | 0    | 0    | 0    | 0     | 0     | 0    | 0.49  | 0    | 0    | 0    | 0    | 0    | 0.24 | 0.88 | 0.75  | 0     | 0     | 0.202 | 0.187 | -0.111 | 1 |
| hsa-miR-6514-5p | 2.29  | 1.04 | 12.77 | 2.01 | 5.74 | 2.93 | 4.54  | 10.79 | 1.86 | 6.88  | 17.8 | 4.24 | 8.96 | 6.21 | 4.91 | 4.71 | 2.21 | 2.39  | 2.15  | 11.02 | 5.085 | 6.46  | 0.3453 | 1 |
| hsa-miR-4727-5p | 0     | 0.35 | 0     | 0    | 0    | 0    | 0     | 0     | 0    | 0     | 0    | 0    | 0    | 0    | 0    | 0    | 0    | 0.45  | 0     | 0     | 0.035 | 0.045 | 0.3626 | 1 |
| hsa-miR-205-3p  | 0     | 0    | 0     | 0.29 | 0    | 0    | 0     | 0     | 0    | 0     | 0    | 0    | 0    | 0    | 0    | 0.24 | 0    | 0     | 0     | 0     | 0.029 | 0.024 | -0.273 | 1 |
| hsa-miR-6718-5p | 0     | 0.35 | 0     | 0    | 0    | 0    | 0     | 0     | 0    | 0     | 0    | 0    | 0    | 0    | 0    | 0    | 0    | 0.45  | 0     | 0     | 0.035 | 0.045 | 0.3626 | 1 |
| hsa-miR-663a    | 0.76  | 0    | 0     | 0.29 | 0    | 0    | 0     | 0     | 0    | 0     | 0    | 0    | 0.6  | 0    | 0    | 0    | 0.44 | 0.45  | 0     | 0     | 0.105 | 0.149 | 0.5049 | 1 |

|                 |      |      |   |      |      |      |   |     |      |      |   |      |   |      |      |      |      |      |      |      |       |       |        |        |   |
|-----------------|------|------|---|------|------|------|---|-----|------|------|---|------|---|------|------|------|------|------|------|------|-------|-------|--------|--------|---|
| hsa-miR-6772-5p | 0    | 0    | 0 | 0.57 | 0    | 0    | 0 | 0   | 0.62 | 0.98 | 0 | 0    | 0 | 1.86 | 0.98 | 0    | 0.44 | 0.3  | 0    | 0    | 0.217 | 0.358 | 0.7223 | 1      |   |
| hsa-miR-539-5p  | 0    | 0.69 | 0 | 0    | 0    | 0    | 0 | 0   | 0    | 0    | 0 | 0.53 | 0 | 0    | 0    | 0    | 0    | 0    | 0    | 0    | 0.069 | 0.053 | -0.381 | 1      |   |
| hsa-miR-3659    | 0    | 0    | 0 | 0    | 0    | 0    | 0 | 0   | 0    | 0.49 | 0 | 0    | 0 | 0    | 0    | 0    | 0    | 0.15 | 0    | 0    | 0.049 | 0.015 | -1.708 | 1      |   |
| hsa-miR-6847-3p | 0    | 0    | 0 | 0    | 0    | 0.49 | 0 | 0   | 0    | 0    | 0 | 0    | 0 | 0    | 0    | 0    | 0    | 0.3  | 0    | 0    | 0.049 | 0.03  | -0.708 | 1      |   |
| hsa-miR-7856-5p | 0.38 | 0    | 0 | 0    | 1.43 | 0    | 0 | 0.8 | 0    | 0    | 0 | 0    | 0 | 0    | 0    | 0    | 0    | 0.9  | 0.36 | 0    | 0.261 | 0.126 | -1.051 | 1      |   |
| hsa-miR-7113-3p | 0    | 0    | 0 | 0    | 0    | 0    | 0 | 0   | 0.62 | 0    | 0 | 0    | 0 | 0    | 0    | 0    | 0    | 0    | 0.72 | 0    | 0.062 | 0.072 | 0.2157 | 1      |   |
| hsa-miR-642b-3p | 0    | 0.69 | 0 | 0.57 | 0    | 0    | 0 | 0.4 | 0    | 0    | 0 | 0.53 | 0 | 0    | 0    | 0.71 | 0.44 | 0.15 | 0    | 0    | 0.166 | 0.183 | 0.1407 | 1      |   |
| hsa-miR-202-3p  | 0.76 | 0    | 0 | 1.15 | 1.43 | 5.38 | 0 | 0   | 1.24 | 0    | 0 | 0.53 | 0 | 0    | 1.96 | 0.94 | 0.44 | 3.89 | 1.08 | 1.79 | 0.996 | 1.063 | 0.0939 | 1      |   |
| hsa-miR-6883-3p | 0.38 | 0    | 0 | 0    | 0    | 0    | 0 | 0   | 0    | 0    | 0 | 0    | 0 | 0    | 0    | 0    | 0.44 | 0    | 0    | 0    | 0.038 | 0.044 | 0.2115 | 1      |   |
| hsa-miR-3186-5p | 1.15 | 1.39 | 0 | 0    | 0    | 0    | 0 | 0   | 0    | 0    | 0 | 0    | 0 | 2.39 | 0    | 0    | 0.24 | 0.44 | 0    | 0    | 0     | 0.254 | 0.307  | 0.2734 | 1 |
